# Supplementary material for: Visible-light-mediated substituent-controlled regiodivergent (2 + 2)/(3 + 2) cycloadditions for the synthesis of aza-analogs of β-lactam and γ-fused lactam derivatives
Source: Royal Society of Chemistry journal article supplement (doi:10.1039/d4qo00584h), 2024-01-01
Supplement: d4qo00584h1.pdf [file d4qo00584h1.pdf]

# **Visible-Light-Mediated Substituent-Controlled Regiodivergent (2 + 2)/(3 + 2) Cycloadditions for the Synthesis of Aza-analogs of $\beta$ -Lactam and $\gamma$ -fused Lactam Derivatives**

**Wei-Fang Zuo,<sup>‡a</sup> Yang Zhang,<sup>‡a</sup> Yulin Luo,<sup>a</sup> Xiang Li,<sup>\*a</sup> Gu Zhan,<sup>a</sup> Jin Zhou,<sup>a</sup> Qiwen Pang,<sup>a</sup>  
Qian-Qian Yang,<sup>\*a</sup> and Bo Han<sup>\*a</sup>**

<sup>a</sup> State Key Laboratory of Southwestern Chinese Medicine Resources, Hospital of Chengdu University of Traditional Chinese Medicine, School of Pharmacy, Chengdu University of Traditional Chinese Medicine, Chengdu 611137, P. R. China

<sup>‡</sup> These authors contributed equally to this work.

## **Supporting Information**

|                                                                    |    |
|--------------------------------------------------------------------|----|
| 1. General methods .....                                           | 2  |
| 2. General procedure for synthesis of product 3 .....              | 2  |
| 3. General procedure for synthesis of product 3m .....             | 6  |
| 4. General procedure for synthesis of product 5 .....              | 7  |
| 5. General procedure for synthesis of product 7 .....              | 13 |
| 6. Gram-scale synthesis of compound 5a.....                        | 16 |
| 7. Synthesis of product 8 .....                                    | 17 |
| 8. Synthesis of product 9 .....                                    | 17 |
| 9. Synthesis of product 10.....                                    | 18 |
| 10. Synthesis of product 12.....                                   | 19 |
| 11. Synthesis of product 13.....                                   | 20 |
| 12. X-ray crystal structures of 3a, 5b and 7a.....                 | 21 |
| 13. <sup>1</sup> H NMR, <sup>13</sup> C NMR and HPLC Spectra ..... | 25 |

## 1. General methods

Nuclear magnetic resonance (NMR) spectra were recorded in  $\text{CDCl}_3$  and  $\text{DMSO}-d_6$  on Bruker 600 MHz (at 600 MHz for  $^1\text{H}$ , and at 150 MHz for  $^{13}\text{C}$ ). The  $^1\text{H}$  NMR chemical shifts are reported in ppm with the internal TMS signal at 0.0 ppm as standard. The  $^{13}\text{C}$  NMR chemical shifts were given using  $\text{CDCl}_3$  as the internal standard ( $\text{CDCl}_3$ :  $\delta = 77.2$  ppm and  $\text{DMSO}-d_6$ :  $\delta = 39.5$  ppm). High-resolution mass spectra (HRMS) were obtained using Agilent P/N G1969-90010. High-resolution mass spectra were reported for the molecular ion  $[\text{M}+\text{H}]^+$  or  $[\text{M}+\text{Na}]^+$ . Melting points were recorded on BUCHI Melting Point M-565 instrument. X-ray diffraction experiment was carried out on an Agilent D8 QUEST and the data obtained were deposited at the Cambridge Crystallographic Data Centre. UV detection was performed at 254 nm. TLC was performed on glass-backed silica plates; products were visualized using UV light. All reagents and solvents were obtained from commercial sources and used without further purification. azo esters **1**<sup>1</sup>,  $\alpha$ -diazo ketones **2**<sup>2</sup> and azonaphthalenes **4**<sup>1</sup> were prepared according to the literature procedures.

### Reference

1. L.-W. Qi, J.-H. Mao, J. Zhang and B. Tan, *Nature Chem.*, 2018, **10**, 58-64.
2. J. R. Denton and H. M. L. Davies, *Org. Lett.*, 2009, **11**, 787-790.

## 2. General procedure for synthesis of product 3

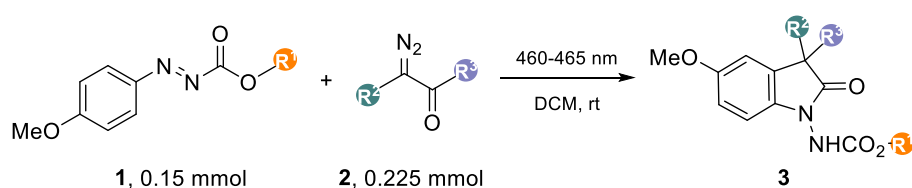

A mixture of 4-methoxyazobenzenes **1** (0.15 mmol) and  $\alpha$ -diazo ketones **2** (0.225 mmol) was stirred in  $\text{CH}_2\text{Cl}_2$  (1.0 mL) at room temperature and then irradiated under blue LEDs for hours. After the reaction completed (monitored by TLC), the reaction mixture was purified by column chromatography to afford the desired products **3** as white solids.

### Analytical data of compounds 3

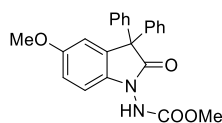

**3a**

**Methyl (5-methoxy-2-oxo-3,3-diphenylindolin-1-yl)carbamate (3a):** The residue was purified by flash chromatography (PE/EA = 5/1) giving the product **3a** as a white solid in 74% yield (43.0 mg), m. p. 199.1-200.7 °C. <sup>1</sup>H NMR (600 MHz, Chloroform-*d*) δ 7.35 – 7.27 (m, 10H), 7.03 (s, 1H), 6.95 (d, *J* = 8.4 Hz, 1H), 6.86 (dd, *J* = 8.4, 2.4 Hz, 1H), 6.83 (d, *J* = 3.0 Hz, 1H), 3.84 (s, 3H), 3.77 (s, 3H). <sup>13</sup>C NMR (151 MHz, CDCl<sub>3</sub>) δ 156.7, 134.8, 131.6, 128.54, 128.52, 127.5, 113.6, 112.9, 109.1, 61.5, 55.8, 53.6. HRMS (ESI-TOF) *m/z* [M + Na]<sup>+</sup> Calcd for C<sub>23</sub>H<sub>20</sub>N<sub>2</sub>O<sub>4</sub>Na 411.1315; found 411.1310.

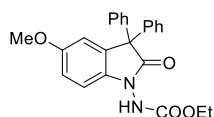

**3b**

**Ethyl (5-methoxy-2-oxo-3,3-diphenylindolin-1-yl)carbamate (3b):** The residue was purified by flash chromatography (PE/EA = 5/1) giving the product **3b** as a white solid in 62% yield (37.4 mg), m. p. 157.6-159.1 °C. <sup>1</sup>H NMR (600 MHz, Chloroform-*d*) δ 7.34 – 7.24 (m, 10H), 7.00 – 6.87 (m, 2H), 6.83 (dd, *J* = 8.4, 2.4 Hz, 1H), 6.80 (d, *J* = 2.4 Hz, 1H), 4.26 (s, 2H), 3.74 (s, 3H), 1.40 – 1.08 (m, 3H). <sup>13</sup>C NMR (151 MHz, CDCl<sub>3</sub>) δ 156.6, 134.9, 131.6, 128.53, 128.50, 127.5, 113.6, 112.9, 109.1, 62.9, 61.5, 55.8, 14.3. HRMS (ESI-TOF) *m/z* [M + Na]<sup>+</sup> Calcd for C<sub>24</sub>H<sub>22</sub>N<sub>2</sub>O<sub>4</sub>Na 425.1472; found 425.1472.

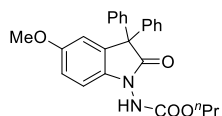

**3c**

**Propyl (5-methoxy-2-oxo-3,3-diphenylindolin-1-yl)carbamate (3c):** The residue was purified by flash chromatography (PE/EA = 5/1) giving the product **3c** as a white solid in 64% yield (40.0 mg), m. p. 75.2-77.1 °C. <sup>1</sup>H NMR (600 MHz, Chloroform-*d*) δ 7.32 – 7.30 (m, 2H), 7.28 – 7.23 (m, 9H), 6.91 (d, *J* = 8.4 Hz, 1H), 6.82 (dd, *J* = 8.4, 2.4 Hz, 1H), 6.79 (d, *J* = 2.4 Hz, 1H), 4.14 (s, 2H), 3.73 (s, 3H), 1.75 – 1.43 (m, 2H), 0.98 – 0.65 (m, 3H). <sup>13</sup>C NMR (151 MHz, CDCl<sub>3</sub>) δ 176.5, 156.7, 138.3, 134.9, 131.6, 128.7, 128.6, 128.5, 128.54, 127.53, 127.4, 113.5, 112.9, 109.2, 68.4, 61.6, 55.8, 22.1, 10.1. HRMS (ESI-TOF) *m/z* [M + Na]<sup>+</sup> Calcd for C<sub>25</sub>H<sub>24</sub>N<sub>2</sub>O<sub>4</sub>Na 439.1628; found 439.1624.

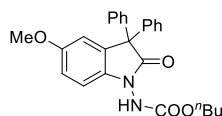

**3d**

**Butyl (5-methoxy-2-oxo-3,3-diphenylindolin-1-yl)carbamate (3d):** The residue was purified by flash chromatography (PE/EA = 5/1) giving the product **3d** as a white solid in 62% yield (40.0 mg), m. p. 82.4-84.2 °C. <sup>1</sup>H NMR (600 MHz, Chloroform-*d*) δ 7.33 – 7.22 (m, 10H), 7.17 (s, 1H), 6.90 (d, *J* = 8.4 Hz, 1H), 6.82 (dd, *J* = 8.4, 2.4 Hz, 1H), 6.79 (d, *J* = 2.4 Hz, 1H), 4.19 (s, 2H), 3.73 (s, 3H), 1.68 – 1.22 (m, 4H), 0.96 – 0.81 (m, 3H). <sup>13</sup>C NMR (151 MHz, CDCl<sub>3</sub>) δ 154.4, 132.7, 129.3, 126.3, 126.2, 125.2, 111.3, 110.6, 106.9, 64.4, 59.3, 53.5, 28.4, 16.6, 11.4. HRMS (ESI-TOF) *m/z* [M + Na]<sup>+</sup> Calcd for C<sub>26</sub>H<sub>26</sub>N<sub>2</sub>O<sub>4</sub>Na 453.1785; found 453.1782.

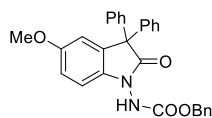

3e

**Benzyl (5-methoxy-2-oxo-3,3-diphenylindolin-1-yl)carbamate (3e):** The residue

was purified by flash chromatography (PE/EA = 5/1) giving the product **3e** as a white solid in 56% yield (39.0 mg), m. p. 84.0-85.9 °C. <sup>1</sup>H NMR (600 MHz, Chloroform-*d*) δ 7.39 – 7.09 (m, 15H), 6.96 (s, 1H), 6.83 (d, *J* = 8.4 Hz, 1H), 6.75 (dd, *J* = 8.4, 2.4 Hz, 1H), 6.72 (d, *J* = 2.4 Hz, 1H), 5.16 (s, 2H), 3.66 (s, 3H). <sup>13</sup>C NMR (151 MHz, CDCl<sub>3</sub>) δ 156.7, 134.8, 131.6, 128.7, 128.5, 127.5, 113.6, 112.9, 109.1, 68.5, 61.5, 55.8. HRMS (ESI-TOF) *m/z* [M + Na]<sup>+</sup> Calcd for C<sub>29</sub>H<sub>24</sub>N<sub>2</sub>O<sub>4</sub>Na 487.1628; found 487.1623.

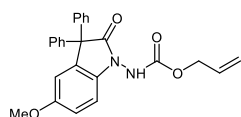

3f

**Allyl (5-methoxy-2-oxo-3,3-diphenylindolin-1-yl)carbamate (3f):** The residue

was purified by flash chromatography (PE/EA = 5/1) giving the product **3f** as a white solid in 70% yield (43.5 mg), m. p. 84.2-86.0 °C. <sup>1</sup>H NMR (600 MHz, Chloroform-*d*) δ 7.26 – 7.15 (m, 10H), 6.96 (s, 1H), 6.86 (d, *J* = 8.4 Hz, 1H), 6.76 (dd, *J* = 8.4, 2.4 Hz, 1H), 6.73 (d, *J* = 2.4 Hz, 1H), 5.87 (s, 1H), 5.36 – 5.09 (m, 2H), 4.63 (s, 2H), 3.67 (s, 3H). <sup>13</sup>C NMR (151 MHz, CDCl<sub>3</sub>) δ 156.7, 134.8, 131.6, 128.5, 127.5, 118.8, 113.6, 112.9, 109.1, 67.3, 61.5, 55.8. HRMS (ESI-TOF) *m/z* [M + Na]<sup>+</sup> Calcd for C<sub>25</sub>H<sub>22</sub>N<sub>2</sub>O<sub>4</sub>Na 437.1472; found 437.1471.

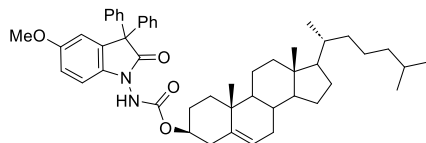

3g

**(3*S*,10*R*,13*R*)-10,13-dimethyl-17-((*R*)-6-methylheptan-2-yl)-**

**2,3,4,7,8,9,10,11,12,13,14,15,16,17-tetradecahydro-1H-cyclopenta[a]phenanthren-3-yl (5-methoxy-2-oxo-3,3-diphenylindolin-1-yl)carbamate (3g):** The residue was purified by flash chromatography (PE/EA = 5/1) giving the product **3g** as a white solid in 60% yield (67.3 mg), m. p. 206.9-208.8 °C. <sup>1</sup>H NMR (600 MHz, Chloroform-*d*) δ 7.27 – 7.24 (m, 5H), 7.23 – 7.21 (m, 4H), 7.20 – 7.19 (m, 1H), 6.99 (s, 1H), 6.86 (d, *J* = 9.0 Hz, 1H), 6.76 (dd, *J* = 8.4, 2.4 Hz, 1H), 6.73 (d, *J* = 2.4 Hz, 1H), 5.29 (s, 1H), 4.98 (s, 1H), 4.55 (s, 1H), 3.68 (s, 3H), 2.40 – 2.08 (m, 2H), 1.97 – 1.72 (m, 5H), 1.55 – 1.15 (m, 12H), 1.11 – 0.96 (m, 7H), 0.95 – 0.88 (m, 4H), 0.84 (d, *J* = 6.6 Hz, 3H), 0.80 – 0.76 (m, 6H), 0.60 (s, 3H). <sup>13</sup>C NMR (151 MHz, CDCl<sub>3</sub>) δ 177.4, 156.6, 139.2, 138.0, 134.9, 128.70, 128.68, 128.6, 128.5, 127.5, 123.0, 113.5, 112.9, 109.1, 61.6, 56.9, 56.7, 56.1, 55.8, 50.0, 42.3, 39.7, 39.5, 36.9, 36.5, 36.2, 35.8, 31.9, 31.8, 28.2, 28.0, 24.3, 23.8, 22.8, 22.6, 21.0, 19.4, 18.7, 11.9. HRMS (ESI-TOF) *m/z* [M + Na]<sup>+</sup> Calcd for C<sub>49</sub>H<sub>62</sub>N<sub>2</sub>O<sub>4</sub>Na 765.4602; found 765.4601.

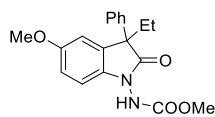

3h

**Methyl (3-ethyl-5-methoxy-2-oxo-3-phenylindolin-1-yl)carbamate (3h):** The

residue was purified by flash chromatography (PE/EA = 5/1) giving the product **3h** as a white solid in 51% yield (26.0 mg), m. p. 141.6-142.5 °C. <sup>1</sup>H NMR (600 MHz, Chloroform-*d*) δ 7.38 (d, *J* = 7.8 Hz,



2H), 7.34 – 7.17 (m, 4H), 6.92 (d,  $J = 8.4$  Hz, 1H), 6.87 (dd,  $J = 8.4, 2.4$  Hz, 1H), 6.82 (s, 1H), 3.81 (s, 6H), 2.52 (dq,  $J = 14.4, 7.2$  Hz, 1H), 2.25 (dq,  $J = 14.4, 7.2$  Hz, 1H), 0.78 (t,  $J = 7.2$  Hz, 3H).  $^{13}\text{C}$  NMR (151 MHz,  $\text{CDCl}_3$ )  $\delta$  156.7, 139.6, 135.8, 128.6, 127.5, 126.9, 112.7, 112.0, 108.8, 56.5, 55.8, 53.5, 9.0. HRMS (ESI-TOF)  $m/z$   $[\text{M} + \text{Na}]^+$  Calcd for  $\text{C}_{19}\text{H}_{20}\text{N}_2\text{O}_4\text{Na}$  363.1315; found 363.1313.

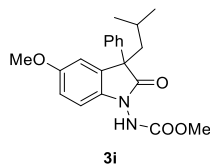

**Methyl (3-isobutyl-5-methoxy-2-oxo-3-phenylindolin-1-yl)carbamate (3i):** The

residue was purified by flash chromatography (PE/EA = 5/1) giving the product **3i** as a white solid in 57% yield (31.5 mg), m. p. 124.4-125.3 °C.  $^1\text{H}$  NMR (600 MHz, Chloroform- $d$ )  $\delta$  7.38 (d,  $J = 7.2$  Hz, 2H), 7.30 – 7.28 (m, 2H), 7.25 – 7.22 (m, 1H), 7.07 (s, 1H), 6.92 (d,  $J = 8.4$  Hz, 1H), 6.88 (dd,  $J = 8.4, 2.4$  Hz, 1H), 6.86 (s, 1H), 3.82 (s, 6H), 2.49 (dd,  $J = 13.8, 6.6$  Hz, 1H), 2.19 (dd,  $J = 14.4, 6.0$  Hz, 1H), 1.58 (s, 1H), 0.85 (d,  $J = 6.6$  Hz, 3H), 0.71 (d,  $J = 6.6$  Hz, 3H).  $^{13}\text{C}$  NMR (151 MHz,  $\text{CDCl}_3$ )  $\delta$  156.5, 140.9, 135.7, 128.6, 127.4, 126.7, 112.7, 108.8, 55.9, 55.5, 53.4, 25.4, 24.3, 23.5. HRMS (ESI-TOF)  $m/z$   $[\text{M} + \text{Na}]^+$  Calcd for  $\text{C}_{21}\text{H}_{24}\text{N}_2\text{O}_4\text{Na}$  391.1628; found 391.1627.

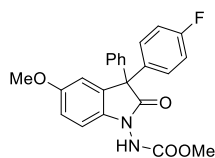

**Methyl (3-(4-fluorophenyl)-5-methoxy-2-oxo-3-phenylindolin-1-yl)carbamate (3j):**

The residue was purified by flash chromatography (PE/EA = 5/1) giving the product **3j** as a white solid in 67% yield (40.8 mg), m. p. 142.0-143.4 °C.  $^1\text{H}$  NMR (600 MHz, Chloroform- $d$ )  $\delta$  7.33 – 7.27 (m, 7H), 7.09 (s, 1H), 7.02 – 6.97 (m, 2H), 6.95 (d,  $J = 8.4$  Hz, 1H), 6.87 (dd,  $J = 8.4, 2.4$  Hz, 1H), 6.80 (d,  $J = 2.4$  Hz, 1H), 3.84 (s, 3H), 3.78 (s, 3H).  $^{13}\text{C}$  NMR (151 MHz,  $\text{CDCl}_3$ )  $\delta$  162.2(d,  $J_{\text{C,F}} = 244.5$  Hz), 156.8, 155.5, 134.7, 131.5, 130.3(d,  $J_{\text{C,F}} = 30.0$  Hz), 128.7, 128.3, 127.7, 115.5, 115.3, 113.5, 113.0, 109.2, 60.9, 55.8, 53.7. HRMS (ESI-TOF)  $m/z$   $[\text{M} + \text{Na}]^+$  Calcd for  $\text{C}_{23}\text{H}_{19}\text{FN}_2\text{O}_4\text{Na}$  429.1221; found 429.1220.

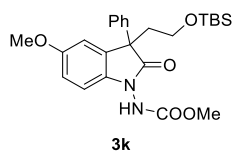

**Methyl (3-(2-((tert-butyldimethylsilyl)oxy)ethyl)-5-methoxy-2-oxo-3-**

**phenylindolin-1-yl)carbamate (3k):** The residue was purified by flash chromatography (PE/EA = 5/1) giving the product **3k** as a colorless oil in 36% yield (25.2 mg).  $^1\text{H}$  NMR (600 MHz, Chloroform- $d$ )  $\delta$  7.41 (d,  $J = 7.8$  Hz, 2H), 7.36 – 7.32 (m, 2H), 7.29 (t,  $J = 7.2$  Hz, 1H), 7.20 (s, 1H), 6.94 (d,  $J = 9.0$  Hz, 1H), 6.91 (dd,  $J = 8.4, 2.4$  Hz, 1H), 6.88 (s, 1H), 3.84 (s, 6H), 3.65 (s, 1H), 3.47 (s, 1H), 2.87 – 2.79 (m, 1H), 2.55 – 2.50 (m, 1H), 0.87 (s, 9H), 0.01 (s, 3H), 0.00 (s, 3H).  $^{13}\text{C}$  NMR (151 MHz,  $\text{CDCl}_3$ )  $\delta$  162.1, 141.0, 134.1, 133.0, 132.1, 130.7, 118.5, 117.4, 114.3, 64.9, 61.3, 59.2, 58.9, 31.3, 23.6, 0.0. HRMS (ESI-TOF)  $m/z$   $[\text{M} + \text{Na}]^+$  Calcd for  $\text{C}_{25}\text{H}_{34}\text{N}_2\text{O}_5\text{SiNa}$  493.2129; found 493.2127.

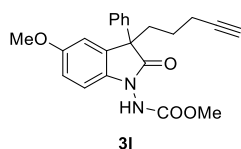

**Methyl (5-methoxy-2-oxo-3-(pent-4-yn-1-yl)-3-phenylindolin-1-yl)carbamate**

**(3l):** The residue was purified by flash chromatography (PE/EA = 5/1) giving the product **3l** as a colorless oil in 32% yield (18.4 mg). <sup>1</sup>H NMR (600 MHz, Chloroform-*d*) δ 7.30 (d, *J* = 7.8 Hz, 2H), 7.23 (t, *J* = 7.8 Hz, 2H), 7.18 (t, *J* = 7.2 Hz, 1H), 6.97 – 6.83 (m, 2H), 6.79 (dd, *J* = 8.4, 2.4 Hz, 1H), 6.75 (s, 1H), 3.72 (s, 6H), 2.46 (td, *J* = 13.2, 4.8 Hz, 1H), 2.29 (s, 1H), 2.14 – 2.04 (m, 2H), 1.86 (t, *J* = 2.4 Hz, 1H), 1.47 – 1.42 (m, 1H), 1.21 – 1.12 (m, 1H). <sup>13</sup>C NMR (151 MHz, CDCl<sub>3</sub>) δ 155.7, 138.3, 134.5, 127.6, 126.5, 125.7, 111.7, 111.0, 107.7, 82.6, 67.7, 54.7, 54.4, 52.4, 22.2, 17.4. HRMS (ESI-TOF) *m/z* [M + Na]<sup>+</sup> Calcd for C<sub>22</sub>H<sub>22</sub>N<sub>2</sub>O<sub>4</sub>Na 401.1472; found 401.1468.

### 3. General procedure for synthesis of product 3m

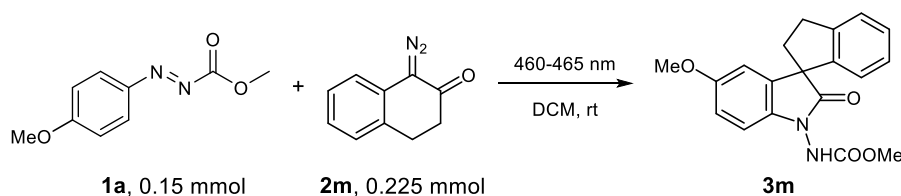

A mixture of 4-methoxyazobenzenes **1a** (0.15 mmol) and  $\alpha$ -diazo ketones **2m** (0.225 mmol) was stirred in CH<sub>2</sub>Cl<sub>2</sub> (1.0 mL) at room temperature and then irradiated under blue LEDs for hours. After the reaction completed (monitored by TLC), the reaction mixture was purified by column chromatography (PE/EtOAc = 5:1, v/v) to afford the desired products **3m** as white solids.

#### Analytical data of compounds 3m

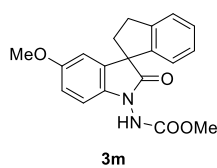

**Methyl (5'-methoxy-2'-oxo-2,3-dihydrospiro[indene-1,3'-indolin]-1'-yl)carbamate (3m):**

The residue was purified by flash chromatography (PE/EA = 3/1) giving the product **3m** as a white solid in 15% yield (7.5 mg), m. p. 87.5-89.0 °C. <sup>1</sup>H NMR (600 MHz, Chloroform-*d*) δ 7.28 (d, *J* = 7.8 Hz, 1H), 7.17 (t, *J* = 7.8 Hz, 1H), 7.03 (t, *J* = 7.2 Hz, 1H), 6.90 (s, 1H), 6.83 (d, *J* = 8.4 Hz, 1H), 6.75 (dd, *J* = 8.4, 2.4 Hz, 2H), 6.58 (d, *J* = 3.0 Hz, 1H), 3.74 (s, 3H), 3.66 (s, 3H), 3.38 – 3.32 (m, 1H), 3.17 – 3.12 (m, 1H), 2.69 – 2.64 (m, 1H), 2.39 – 2.35 (m, 1H). <sup>13</sup>C NMR (151 MHz, CDCl<sub>3</sub>) δ 157.0, 144.8, 143.5, 135.2, 133.2, 128.2, 127.2, 125.0, 123.7, 113.0, 110.7, 108.6, 59.2, 55.8, 53.6, 37.8, 31.7. HRMS (ESI-TOF) *m/z* [M + Na]<sup>+</sup> Calcd for C<sub>19</sub>H<sub>18</sub>N<sub>2</sub>O<sub>4</sub>Na 361.1159; found 361.1162.

## 4. General procedure for synthesis of product 5

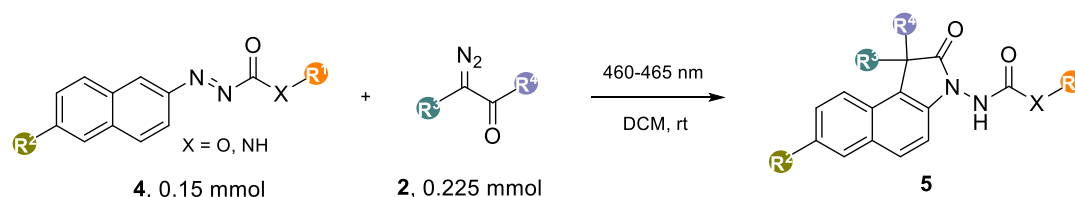

A mixture of azonaphthalenes **4** (0.15 mmol) and  $\alpha$ -diazo ketones **2** (0.225 mmol) was stirred in  $\text{CH}_2\text{Cl}_2$  (1.0 mL) at room temperature and then irradiated under blue LEDs for hours. After the reaction completed (monitored by TLC), the reaction mixture was purified by column chromatography to afford the desired products **5** as white solids.

### Analytical data of compounds **5**

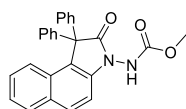

**5a** **Methyl (2-oxo-1,1-diphenyl-1,2-dihydro-3H-benzo[e]indol-3-yl)carbamate (5a):** The residue was purified by flash chromatography (PE/EA = 8/1) giving the product **5a** as a white solid in 91% yield (55.6 mg), m. p. 192.7-193.9 °C.  $^1\text{H}$  NMR (600 MHz, Chloroform-*d*)  $\delta$  7.82 (d,  $J$  = 9.0 Hz, 1H), 7.75 (d,  $J$  = 7.8 Hz, 1H), 7.38 (d,  $J$  = 8.4 Hz, 1H), 7.32 – 7.28 (m, 4H), 7.24 (d,  $J$  = 8.4 Hz, 1H), 7.21 – 7.11 (m, 9H), 3.71 (s, 3H).  $^{13}\text{C}$  NMR (151 MHz,  $\text{CDCl}_3$ )  $\delta$  178.0, 154.7, 138.5, 137.3, 130.2, 129.6, 128.9, 128.4, 128.3, 127.7, 127.6, 127.3, 126.6, 126.1, 122.9, 122.4, 121.8, 108.6, 61.0, 52.6. HRMS (ESI-TOF)  $m/z$   $[\text{M} + \text{Na}]^+$  Calcd for  $\text{C}_{26}\text{H}_{20}\text{N}_2\text{O}_3\text{Na}$  431.1366; found 431.1369.

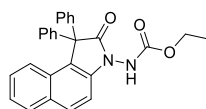

**5b** **Ethyl (2-oxo-1,1-diphenyl-1,2-dihydro-3H-benzo[e]indol-3-yl)carbamate (5b):** The residue was purified by flash chromatography (PE/EA = 8/1) giving the product **5b** as a white solid in 88% yield (55.8 mg), m. p. 166.3-167.8 °C.  $^1\text{H}$  NMR (700 MHz, Chloroform-*d*)  $\delta$  7.92 (d,  $J$  = 9.1 Hz, 1H), 7.84 (d,  $J$  = 8.4 Hz, 1H), 7.46 (d,  $J$  = 8.4 Hz, 1H), 7.42 – 7.41 (m, 3H), 7.35 (d,  $J$  = 8.4 Hz, 1H), 7.29 (t,  $J$  = 7.7 Hz, 1H), 7.26 – 7.17 (m, 8H), 7.09 (s, 1H), 4.28 – 4.10 (m, 2H), 1.32 – 1.10 (m, 3H).  $^{13}\text{C}$  NMR (176 MHz,  $\text{CDCl}_3$ )  $\delta$  178.9, 155.3, 139.7, 131.3, 130.6, 130.0, 129.5, 129.4, 128.4, 127.6, 127.1, 123.9, 123.5, 122.8, 109.6, 63.0, 62.0, 14.3. HRMS (ESI-TOF)  $m/z$   $[\text{M} + \text{Na}]^+$  Calcd for  $\text{C}_{27}\text{H}_{22}\text{N}_2\text{O}_3\text{Na}$  445.1523; found 445.1526.

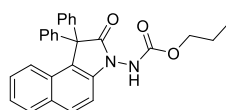

**5c** **Propyl (2-oxo-1,1-diphenyl-1,2-dihydro-3H-benzo[e]indol-3-yl)carbamate (5c):** The residue was purified by flash chromatography (PE/EA = 8/1) giving the product **5c** as a white solid

in 82% yield (53.6 mg), m. p. 192.4-194.1 °C. <sup>1</sup>H NMR (600 MHz, Chloroform-*d*) δ 7.94 (d, *J* = 8.4 Hz, 1H), 7.85 (d, *J* = 7.8 Hz, 1H), 7.48 (d, *J* = 8.4 Hz, 1H), 7.46 – 7.33 (m, 5H), 7.32 – 7.26 (m, 5H), 7.25 – 7.21 (m, 3H), 7.01 (s, 1H), 4.21 (s, 2H), 1.76 – 1.56 (m, 2H), 1.06 – 0.60 (m, 3H). <sup>13</sup>C NMR (151 MHz, CDCl<sub>3</sub>) δ 179.0, 155.4, 139.7, 131.3, 130.6, 130.0, 129.5, 129.3, 128.4, 127.7, 127.2, 124.0, 123.5, 122.9, 109.5, 68.6, 62.1, 22.1, 10.2. HRMS (ESI-TOF) *m/z* [M + Na]<sup>+</sup> Calcd for C<sub>28</sub>H<sub>24</sub>N<sub>2</sub>O<sub>3</sub>Na 459.1679; found 459.1678.

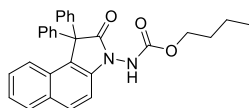

5d

***Butyl (2-oxo-1,1-diphenyl-1,2-dihydro-3H-benzo[e]indol-3-yl)carbamate (5d):***

The residue was purified by flash chromatography (PE/EA = 8/1) giving the product **5d** as a white solid in 87% yield (58.5 mg), m. p. 146.5-147.7 °C. <sup>1</sup>H NMR (600 MHz, Chloroform-*d*) δ 7.94 (d, *J* = 9.0 Hz, 1H), 7.85 (d, *J* = 7.8 Hz, 1H), 7.48 (d, *J* = 8.4 Hz, 1H), 7.46 – 7.35 (m, 5H), 7.32 – 7.27 (m, 5H), 7.25 – 7.22 (m, 3H), 6.95 (s, 1H), 4.24 (s, 2H), 1.69 (s, 2H), 1.43 (s, 2H), 0.96 – 0.80 (m, 3H). <sup>13</sup>C NMR (151 MHz, CDCl<sub>3</sub>) δ 179.5, 155.4, 139.7, 131.3, 130.6, 130.0, 129.5, 129.4, 128.4, 127.7, 127.2, 124.0, 123.5, 122.9, 109.5, 66.9, 62.1, 30.7, 18.9, 13.7. HRMS (ESI-TOF) *m/z* [M + Na]<sup>+</sup> Calcd for C<sub>29</sub>H<sub>26</sub>N<sub>2</sub>O<sub>3</sub>Na 473.1836; found 473.1838.

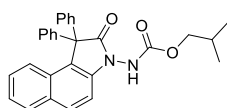

5e

***Isobutyl (2-oxo-1,1-diphenyl-1,2-dihydro-3H-benzo[e]indol-3-yl)carbamate (5e):***

The residue was purified by flash chromatography (PE/EA = 8/1) giving the product **5e** as a white solid in 80% yield (54.3 mg), m. p. 149.2-151.0 °C. <sup>1</sup>H NMR (700 MHz, Chloroform-*d*) δ 7.87 (d, *J* = 8.4 Hz, 1H), 7.77 (d, *J* = 7.7 Hz, 1H), 7.40 (d, *J* = 9.1 Hz, 1H), 7.36 – 7.33 (m, 3H), 7.31 – 7.30 (m, 1H), 7.23 (t, *J* = 7.7 Hz, 1H), 7.20 – 7.16 (m, 8H), 6.91 (s, 1H), 3.96 (s, 2H), 1.31 – 1.15 (m, 1H), 0.91 – 0.58 (m, 6H). <sup>13</sup>C NMR (176 MHz, CDCl<sub>3</sub>) δ 177.8, 154.4, 138.6, 130.2, 129.6, 129.0, 128.4, 127.4, 126.6, 126.1, 122.9, 122.5, 121.8, 108.5, 71.9, 61.0, 26.8, 17.8. HRMS (ESI-TOF) *m/z* [M + Na]<sup>+</sup> Calcd for C<sub>29</sub>H<sub>26</sub>N<sub>2</sub>O<sub>3</sub>Na 473.1836; found 473.1836.

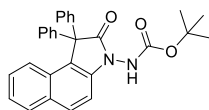

5f

***Tert-butyl (2-oxo-1,1-diphenyl-1,2-dihydro-3H-benzo[e]indol-3-yl)carbamate (5f):***

The residue was purified by flash chromatography (PE/EA = 8/1) giving the product **5f** as a white solid in 82% yield (55.5 mg), m. p. 129.1-130.5 °C. <sup>1</sup>H NMR (600 MHz, Chloroform-*d*) δ 7.85 (d, *J* = 9.0 Hz, 1H), 7.76 (d, *J* = 8.4 Hz, 1H), 7.38 (d, *J* = 8.4 Hz, 1H), 7.36 – 7.31 (m, 3H), 7.29 (d, *J* = 8.4 Hz, 1H), 7.25 – 7.11 (m, 9H), 6.76 (s, 1H), 1.56 – 1.25 (m, 9H). <sup>13</sup>C NMR (151 MHz, CDCl<sub>3</sub>) δ 175.5, 154.1, 139.9, 138.4, 131.2, 130.6, 130.0, 129.5, 129.3, 128.7, 128.6, 128.4, 127.6, 127.4, 127.1, 123.9, 123.5, 122.8, 109.6, 83.0, 62.1, 56.8, 28.1. HRMS (ESI-TOF) *m/z* [M + Na]<sup>+</sup> Calcd for C<sub>29</sub>H<sub>26</sub>N<sub>2</sub>O<sub>3</sub>Na 473.1836; found 473.1845.

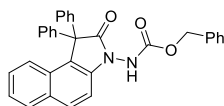

5g

***N*-(2-oxo-1,1-diphenyl-1,2-dihydro-3H-benzo[e]indol-3-yl)carbamate (5g):**

The residue was purified by flash chromatography (PE/EA = 8/1) giving the product **5g** as a white solid in 83% yield (60.3 mg), m. p. 117.4-119.3 °C. <sup>1</sup>H NMR (600 MHz, Chloroform-*d*) δ 7.96 (d, *J* = 8.4 Hz, 1H), 7.88 (d, *J* = 8.4 Hz, 1H), 7.54 – 7.41 (m, 7H), 7.38 (d, *J* = 8.4 Hz, 2H), 7.34 – 7.19 (m, 10H), 7.15 (s, 1H), 5.30 (s, 2H). <sup>13</sup>C NMR (151 MHz, CDCl<sub>3</sub>) δ 178.9, 155.1, 139.6, 131.3, 130.7, 130.0, 129.5, 128.7, 128.4, 127.7, 127.2, 124.0, 123.5, 122.9, 68.6, 62.1. HRMS (ESI-TOF) *m/z* [M + Na]<sup>+</sup> Calcd for C<sub>32</sub>H<sub>24</sub>N<sub>2</sub>O<sub>3</sub>Na 507.1679; found 507.1679.

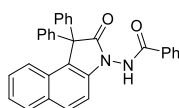

5h

***N*-(2-oxo-1,1-diphenyl-1,2-dihydro-3H-benzo[e]indol-3-yl)benzamide (5h):**

The residue was purified by flash chromatography (PE/EA = 8/1) giving the product **5h** as a white solid in 80% yield (54.6 mg), m. p. 259.1-261.0 °C. <sup>1</sup>H NMR (600 MHz, Chloroform-*d*) δ 9.19 – 9.06 (m, 1H), 7.95 (d, *J* = 7.8 Hz, 2H), 7.90 (d, *J* = 8.4 Hz, 1H), 7.87 (d, *J* = 8.4 Hz, 1H), 7.53 (t, *J* = 7.8 Hz, 1H), 7.48 – 7.39 (m, 7H), 7.32 (t, *J* = 7.8 Hz, 1H), 7.28 – 7.24 (m, 2H), 7.23 – 7.15 (m, 6H). <sup>13</sup>C NMR (151 MHz, CDCl<sub>3</sub>) δ 179.8, 166.2, 139.6, 132.8, 131.3, 130.8, 130.5, 130.0, 129.4, 129.3, 128.8, 128.4, 127.7, 127.6, 127.1, 123.9, 123.5, 123.2, 109.9, 62.5. HRMS (ESI-TOF) *m/z* [M + Na]<sup>+</sup> Calcd for C<sub>31</sub>H<sub>22</sub>N<sub>2</sub>O<sub>2</sub>Na 477.1573; found 477.1575.

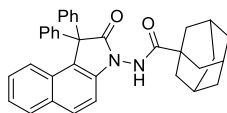

5i

***N*-(2-oxo-1,1-diphenyl-1,2-dihydro-3H-benzo[e]indol-3-yl)adamantane-1-carboxamide (5i):** The residue was purified by flash chromatography (PE/EA = 25/1) giving the product **5i** as a white solid in 65% yield (49.8 mg), m. p. 295.5-297.5 °C. <sup>1</sup>H NMR (600 MHz, Chloroform-*d*) δ 7.87 (d, *J* = 9.0 Hz, 1H), 7.82 (d, *J* = 8.4 Hz, 1H), 7.80 (s, 1H), 7.49 – 7.42 (m, 5H), 7.30 – 7.25 (m, 4H), 7.25 – 7.20 (m, 4H), 7.15 (d, *J* = 9.0 Hz, 1H), 2.13 – 2.10 (m, 3H), 2.09 – 2.06 (m, 6H), 1.82 – 1.75 (m, 6H). <sup>13</sup>C NMR (151 MHz, CDCl<sub>3</sub>) δ 178.6, 176.9, 139.7, 131.2, 130.4, 130.0, 129.41, 129.39, 128.4, 127.6, 127.1, 123.8, 123.4, 123.1, 109.4, 62.3, 40.8, 39.0, 36.3, 27.9. HRMS (ESI-TOF) *m/z* [M + Na]<sup>+</sup> Calcd for C<sub>35</sub>H<sub>32</sub>N<sub>2</sub>O<sub>2</sub>Na 535.2356; found 535.2357.

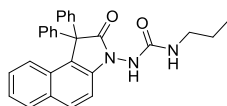

5j

**1-(2-oxo-1,1-diphenyl-1,2-dihydro-3H-benzo[e]indol-3-yl)-3-propylurea (5j):**

The residue was purified by flash chromatography (PE/EA = 6/1) giving the product **5j** as a white solid in 86% yield (56.1 mg), m. p. 269.7-271.7 °C. <sup>1</sup>H NMR (700 MHz, DMSO-*d*<sub>6</sub>) δ 8.97 (s, 1H), 8.05 (d, *J* = 8.4 Hz, 1H), 7.94 (dd, *J* = 7.0, 2.1 Hz, 1H), 7.49 – 7.43 (m, 2H), 7.38 (dd, *J* = 7.0, 2.1 Hz, 1H), 7.34 – 7.27 (m, 9H), 7.24 (s, 1H), 6.91 (t, *J* = 5.6 Hz, 1H), 3.07 (p, *J* = 6.3 Hz, 2H), 1.48 (m, 2H), 0.88 (t, *J* =

7.7 Hz, 3H).  $^{13}\text{C}$  NMR (176 MHz, DMSO)  $\delta$  178.0, 156.2, 141.3, 140.8, 137.6, 130.4, 130.3, 129.5, 129.1, 129.0, 128.8, 128.2, 127.6, 127.1, 127.0, 123.4, 122.4, 121.8, 110.2, 61.4, 41.3, 22.8, 11.2. HRMS (ESI-TOF)  $m/z$   $[\text{M} + \text{Na}]^+$  Calcd for  $\text{C}_{28}\text{H}_{25}\text{N}_3\text{O}_2\text{Na}$  458.1839; found 458.1842.

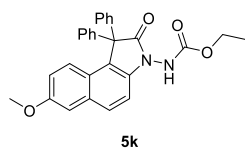

**Ethyl (7-methoxy-2-oxo-1,1-diphenyl-1,2-dihydro-3H-benzo[e]indol-3-yl)carbamate (5k):** The residue was purified by flash chromatography (PE/EA = 8/1) giving the product **5k** as a white solid in 82% yield (55.7 mg), m. p. 192.1-194.0 °C.  $^1\text{H}$  NMR (600 MHz, Chloroform-*d*)  $\delta$  7.82 (d,  $J$  = 8.4 Hz, 1H), 7.47 – 7.36 (m, 5H), 7.33 (d,  $J$  = 9.0 Hz, 1H), 7.29 – 7.23 (m, 6H), 7.15 (d,  $J$  = 3.0 Hz, 1H), 7.00 (s, 1H), 6.94 (dd,  $J$  = 9.0, 2.4 Hz, 1H), 4.30 (s, 2H), 3.86 (s, 3H), 1.38 – 1.08 (m, 3H).  $^{13}\text{C}$  NMR (151 MHz,  $\text{CDCl}_3$ )  $\delta$  179.0, 156.1, 155.3, 137.8, 132.5, 129.4, 129.1, 128.4, 127.6, 125.5, 124.9, 123.3, 120.1, 109.9, 107.3, 63.0, 62.1, 55.3, 14.3. HRMS (ESI-TOF)  $m/z$   $[\text{M} + \text{Na}]^+$  Calcd for  $\text{C}_{28}\text{H}_{24}\text{N}_2\text{O}_4\text{Na}$  475.1628; found 475.1627.

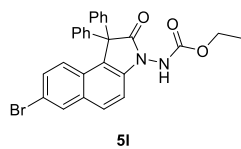

**Ethyl (7-bromo-2-oxo-1,1-diphenyl-1,2-dihydro-3H-benzo[e]indol-3-yl)carbamate (5l):** The residue was purified by flash chromatography (PE/EA = 8/1) giving the product **5l** as a white solid in 78% yield (58.4 mg), m. p. 202.8-204.1 °C.  $^1\text{H}$  NMR (600 MHz, Chloroform-*d*)  $\delta$  8.03 (s, 1H), 7.87 (d,  $J$  = 8.4 Hz, 1H), 7.45 – 7.38 (m, 5H), 7.37 – 7.27 (m, 8H), 7.03 (s, 1H), 4.32 (s, 2H), 1.49 – 1.09 (m, 3H).  $^{13}\text{C}$  NMR (151 MHz,  $\text{CDCl}_3$ )  $\delta$  178.7, 155.2, 140.1, 132.4, 131.3, 130.6, 129.8, 129.3, 128.5, 128.4, 127.9, 125.1, 123.2, 117.8, 110.7, 63.2, 61.9, 14.3. HRMS (ESI-TOF)  $m/z$   $[\text{M} + \text{Na}]^+$  Calcd for  $\text{C}_{27}\text{H}_{21}\text{BrN}_2\text{O}_3\text{Na}$  523.0628; found 523.0626.

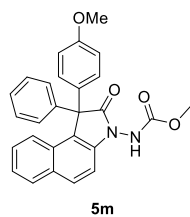

**Methyl (1-(4-methoxyphenyl)-2-oxo-1-phenyl-1,2-dihydro-3H-benzo[e]indol-3-yl)carbamate (5m):** The residue was purified by flash chromatography (PE/EA = 6/1) giving the product **5m** as a white solid in 71% yield (46.8 mg), m. p. 234.8-236.7 °C.  $^1\text{H}$  NMR (600 MHz, Chloroform-*d*)  $\delta$  7.93 (d,  $J$  = 8.4 Hz, 1H), 7.85 (d,  $J$  = 8.4 Hz, 1H), 7.47 (d,  $J$  = 8.4 Hz, 1H), 7.45 – 7.39 (m, 2H), 7.36 (d,  $J$  = 9.0 Hz, 1H), 7.36 – 7.25 (m, 5H), 7.26 – 7.22 (m, 2H), 7.07 (s, 1H), 6.83 – 6.78 (m, 2H), 3.85 (s, 3H), 3.74 (s, 3H).  $^{13}\text{C}$  NMR (151 MHz,  $\text{CDCl}_3$ )  $\delta$  179.0, 159.0, 155.7, 139.5, 131.3, 130.6, 130.0, 129.5, 129.2, 128.4, 127.6, 127.2, 124.0, 123.5, 123.1, 113.8, 109.5, 61.4, 55.2, 53.7. HRMS (ESI-TOF)  $m/z$   $[\text{M} + \text{Na}]^+$  Calcd for  $\text{C}_{27}\text{H}_{22}\text{N}_2\text{O}_4\text{Na}$  461.1472; found 461.1478.

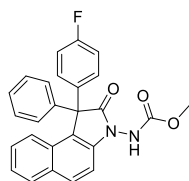

5n

**Methyl (1-(4-fluorophenyl)-2-oxo-1-phenyl-1,2-dihydro-3H-benzo[e]indol-3-yl)carbamate (5n):**

The residue was purified by flash chromatography (PE/EA = 6/1) giving the product **5n** as a white solid in 70% yield (45.0 mg), m. p. 217.9-219.7 °C. <sup>1</sup>H NMR (700 MHz, Chloroform-*d*) δ 7.92 (d, *J* = 8.4 Hz, 1H), 7.84 (d, *J* = 8.4 Hz, 1H), 7.42 (d, *J* = 8.4 Hz, 1H), 7.39 – 7.36 (m, 4H), 7.33 (d, *J* = 9.1 Hz, 1H), 7.30 (t, *J* = 7.7 Hz, 1H), 7.26 – 7.21 (m, 5H), 6.93 (t, *J* = 8.4 Hz, 2H), 3.82 (s, 3H). <sup>13</sup>C NMR (176 MHz, CDCl<sub>3</sub>) δ 179.0, 162.1 (d, *J*<sub>C,F</sub> = 248.5 Hz), 155.7, 139.6, 131.3, 131.1, 130.8, 129.8, 129.6, 129.2, 128.5, 127.8, 127.3, 124.1, 123.2, 122.6, 115.2 (d, *J*<sub>C,F</sub> = 21.1 Hz), 109.6, 61.4, 53.7. HRMS (ESI-TOF) *m/z* [M + Na]<sup>+</sup> Calcd for C<sub>26</sub>H<sub>19</sub>FN<sub>2</sub>O<sub>3</sub>Na 449.1272; found 449.1274.

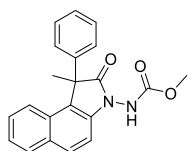

5o

**Methyl (1-methyl-2-oxo-1-phenyl-1,2-dihydro-3H-benzo[e]indol-3-yl)carbamate (5o):**

The residue was purified by flash chromatography (PE/EA = 6/1) giving the product **5o** as a white solid in 79% yield (41.2 mg), m. p. 107.2-108.9 °C. <sup>1</sup>H NMR (700 MHz, Chloroform-*d*) δ 7.91 (d, *J* = 9.1 Hz, 1H), 7.89 – 7.85 (m, 1H), 7.42 – 7.38 (m, 1H), 7.36 – 7.26 (m, 8H), 7.27 – 7.22 (m, 1H), 3.81 (s, 3H), 2.04 (s, 3H). <sup>13</sup>C NMR (176 MHz, CDCl<sub>3</sub>) δ 179.2, 155.6, 139.5, 139.2, 131.4, 129.9, 129.6, 129.0, 128.8, 127.6, 127.2, 127.0, 124.0, 122.8, 109.4, 53.6, 52.0, 22.4. HRMS (ESI-TOF) *m/z* [M + Na]<sup>+</sup> Calcd for C<sub>21</sub>H<sub>18</sub>N<sub>2</sub>O<sub>3</sub>Na 369.1210; found 369.1218.

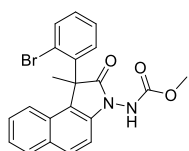

5p

**Methyl (1-(2-bromophenyl)-1-methyl-2-oxo-1,2-dihydro-3H-benzo[e]indol-3-yl)carbamate (5p):**

The residue was purified by flash chromatography (PE/EA = 6/1) giving the product **5p** as a white solid in 73% yield (45.0 mg), m. p. 145.2-146.7 °C. <sup>1</sup>H NMR (600 MHz, Chloroform-*d*) δ 7.99 (dd, *J* = 8.4, 1.8 Hz, 1H), 7.91 (d, *J* = 8.4 Hz, 1H), 7.86 (d, *J* = 8.4 Hz, 1H), 7.56 (td, *J* = 7.8, 1.2 Hz, 1H), 7.47 (dd, *J* = 7.8, 1.2 Hz, 1H), 7.34 (d, *J* = 8.4 Hz, 1H), 7.32 – 7.27 (m, 2H), 7.26 – 7.22 (m, 2H), 7.21 (d, *J* = 8.4 Hz, 1H), 3.88 (s, 3H), 2.07 (s, 3H). <sup>13</sup>C NMR (151 MHz, CDCl<sub>3</sub>) δ 171.2, 155.9, 139.8, 138.8, 134.5, 131.2, 130.1, 129.7, 129.6, 128.5, 127.8, 127.1, 124.1, 123.8, 122.9, 121.2, 109.4, 60.4, 53.5, 21.1. HRMS (ESI-TOF) *m/z* [M + Na]<sup>+</sup> Calcd for C<sub>21</sub>H<sub>17</sub>BrN<sub>2</sub>O<sub>3</sub>Na 447.0315; found 447.0319.

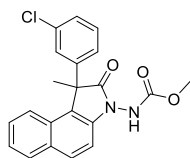

5q

**Methyl (1-(3-chlorophenyl)-1-methyl-2-oxo-1,2-dihydro-3H-benzo[e]indol-3-yl)carbamate (5q):**

The residue was purified by flash chromatography (PE/EA = 6/1) giving the product **5q** as a white solid in 63% yield (36.0 mg), m. p. 165.8-167.1 °C. <sup>1</sup>H NMR (700 MHz, Chloroform-*d*) δ 7.82 (d, *J* = 8.4 Hz, 1H), 7.80 – 7.77 (m, 1H), 7.51 (s, 1H), 7.31 – 7.22 (m, 5H), 7.14 – 6.98 (m, 3H), 3.71 (s, 3H), 1.91 (s, 3H). <sup>13</sup>C NMR (176 MHz, CDCl<sub>3</sub>) δ 178.8, 155.7, 141.3, 139.6, 134.7, 131.4, 130.3, 130.1, 130.0, 129.7, 128.8, 127.9, 127.4, 127.3, 125.4, 124.2, 123.5, 122.5, 109.5, 53.7, 51.7, 22.3. HRMS (ESI-TOF) *m/z* [M + Na]<sup>+</sup> Calcd for C<sub>21</sub>H<sub>17</sub>ClN<sub>2</sub>O<sub>3</sub>Na 403.0820; found 403.0828.

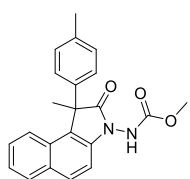

5r

**Methyl (1-methyl-2-oxo-1-(p-tolyl)-1,2-dihydro-3H-benzo[e]indol-3-yl)carbamate (5r):**

The residue was purified by flash chromatography (PE/EA = 6/1) giving the product **5r** as a white solid in 87% yield (47.0 mg), m. p. 103.1-104.9 °C. <sup>1</sup>H NMR (700 MHz, Chloroform-*d*) δ 7.94 – 7.91 (m, 1H), 7.90 – 7.87 (m, 1H), 7.59 (s, 1H), 7.45 – 7.43 (m, 1H), 7.37 – 7.33 (m, 3H), 7.20 (d, *J* = 7.7 Hz, 2H), 7.08 (d, *J* = 8.4 Hz, 2H), 3.83 (s, 3H), 2.29 (s, 3H), 2.02 (s, 3H). <sup>13</sup>C NMR (176 MHz, CDCl<sub>3</sub>) δ 179.4, 155.7, 139.5, 137.2, 136.2, 131.3, 129.8, 129.54, 129.49, 129.0, 127.1, 126.9, 124.3, 124.0, 122.9, 109.5, 53.6, 51.7, 22.4, 21.0. HRMS (ESI-TOF) *m/z* [M + Na]<sup>+</sup> Calcd for C<sub>22</sub>H<sub>20</sub>N<sub>2</sub>O<sub>3</sub>Na 383.1366; found 383.1370.

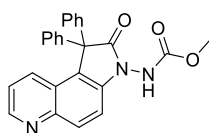

5s

**Methyl (2-oxo-1,1-diphenyl-1,2-dihydro-3H-pyrrolo[3,2-f]quinolin-3-yl)carbamate (5s):**

The residue was purified by flash chromatography (PE/EA = 20/1) giving the product **5s** as a white solid in 75% yield (46.1 mg), m. p. 240.9-241.8 °C. <sup>1</sup>H NMR (700 MHz, Chloroform-*d*) δ 8.75 (d, *J* = 4.2 Hz, 1H), 8.23 (d, *J* = 9.1 Hz, 1H), 7.84 (d, *J* = 8.4 Hz, 1H), 7.70 (s, 1H), 7.59 (d, *J* = 8.4 Hz, 1H), 7.45 – 7.35 (m, 4H), 7.31 – 7.27 (m, 6H), 7.17 (dd, *J* = 8.4, 4.2 Hz, 1H), 3.89 (s, 3H). <sup>13</sup>C NMR (176 MHz, CDCl<sub>3</sub>) δ 178.7, 155.7, 148.4, 145.8, 140.1, 131.9, 131.6, 129.2, 128.6, 127.9, 125.5, 122.8, 121.8, 113.0, 62.0, 53.8. HRMS (ESI-TOF) *m/z* [M + Na]<sup>+</sup> Calcd for C<sub>25</sub>H<sub>19</sub>N<sub>3</sub>O<sub>3</sub>Na 432.1319; found 432.1320.



## 5. General procedure for synthesis of product 7

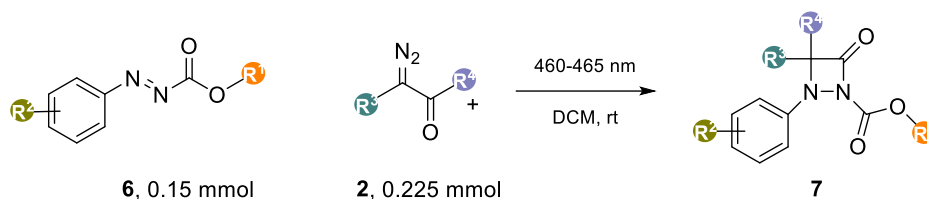

A mixture of non-electron-donating substituted azobenzenes **6** (0.15 mmol) and  $\alpha$ -diazo ketones **2** (0.225 mmol) was stirred in  $\text{CH}_2\text{Cl}_2$  (1.0 mL) at room temperature and then irradiated under blue LEDs for hours. After the reaction completed (monitored by TLC), the reaction mixture was purified by column chromatography to afford the desired products **7** as white solids.

### Analytical data of compounds 7

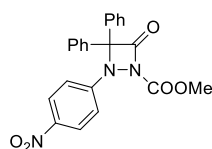

**7a**      *Methyl 2-(4-nitrophenyl)-4-oxo-3,3-diphenyl-1,2-diazetidone-1-carboxylate (7a):*

The residue was purified by flash chromatography (PE/EA = 50/1) giving the product **7a** as a white solid in 91% yield (46.5 mg), m. p. 149.3–151.6 °C.  $^1\text{H}$  NMR (600 MHz, Chloroform-*d*)  $\delta$  8.18 – 8.15 (m, 2H), 7.45 – 7.42 (m, 2H), 7.41 – 7.37 (m, 4H), 7.36 – 7.32 (m, 6H), 3.26 (s, 3H).  $^{13}\text{C}$  NMR (151 MHz,  $\text{CDCl}_3$ )  $\delta$  165.3, 158.6, 144.1, 142.6, 134.3, 129.7, 128.8, 128.1, 124.9, 116.2, 93.0, 53.7. HRMS (ESI-TOF)  $m/z$   $[\text{M} + \text{Na}]^+$  Calcd for  $\text{C}_{22}\text{H}_{17}\text{N}_3\text{O}_5\text{Na}$  426.1060; 426.1065.

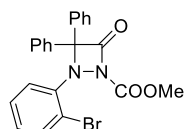

**7b**      *Methyl 2-(2-bromophenyl)-4-oxo-3,3-diphenyl-1,2-diazetidone-1-carboxylate (7b):*

The residue was purified by flash chromatography (PE/EA = 20/1) giving the product **7b** as a white solid in 91% yield (60.0 mg), m. p. 159.1–161.0 °C.  $^1\text{H}$  NMR (600 MHz, Chloroform-*d*)  $\delta$  7.93 – 7.86 (m, 2H), 7.46 – 7.37 (m, 3H), 7.31 (dd,  $J = 7.8, 1.2$  Hz, 1H), 7.23 – 7.20 (m, 2H), 7.18 – 7.10 (m, 3H), 7.08 – 7.02 (m, 2H), 6.81 (td,  $J = 7.8, 1.8$  Hz, 1H), 3.91 (s, 3H).  $^{13}\text{C}$  NMR (151 MHz,  $\text{CDCl}_3$ )  $\delta$  165.3, 148.7, 143.8, 135.8, 133.3, 132.6, 130.0, 129.4, 128.8, 128.6, 128.5, 128.1, 127.4, 126.9, 122.2, 118.6, 95.5, 54.3. HRMS (ESI-TOF)  $m/z$   $[\text{M} + \text{Na}]^+$  Calcd for  $\text{C}_{22}\text{H}_{17}\text{BrN}_2\text{O}_3\text{Na}$  459.0315; found 459.0317.

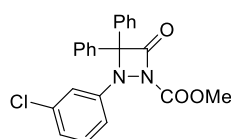

**7c**      *Methyl 2-(3-chlorophenyl)-4-oxo-3,3-diphenyl-1,2-diazetidone-1-carboxylate*

**(7c):** The residue was purified by flash chromatography (PE/EA = 25/1) giving the product **7c** as a white solid in 65% yield (38.3 mg), m. p. 118.2–120.1 °C.  $^1\text{H}$  NMR (600 MHz, Chloroform-*d*)  $\delta$  7.51 – 7.46

(m, 4H), 7.43 – 7.39 (m, 7H), 7.33 (dt,  $J = 7.8, 1.4$  Hz, 1H), 7.29 (t,  $J = 7.8$  Hz, 1H), 7.12 (dt,  $J = 7.8, 1.8$  Hz, 1H), 3.33 (s, 3H).  $^{13}\text{C}$  NMR (151 MHz,  $\text{CDCl}_3$ )  $\delta$  165.4, 158.9, 138.9, 134.74, 134.66, 130.0, 129.4, 128.7, 128.1, 125.0, 116.5, 114.7, 92.4, 53.4. HRMS (ESI-TOF)  $m/z$   $[\text{M} + \text{Na}]^+$  Calcd for  $\text{C}_{22}\text{H}_{17}\text{ClN}_2\text{O}_3\text{Na}$  415.0820; found 415.0825.

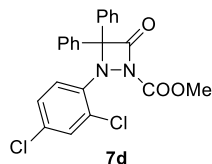

**Methyl 2-(2,4-dichlorophenyl)-4-oxo-3,3-diphenyl-1,2-diazetidone-1-carboxylate**

**(7d):** The residue was purified by flash chromatography (PE/EA = 30/1) giving the product **7d** as a white solid in 77% yield (49.5 mg), m. p. 171.6-173.0 °C.  $^1\text{H}$  NMR (600 MHz, Chloroform-*d*)  $\delta$  7.87 (dd,  $J = 7.2, 2.4$  Hz, 2H), 7.45 – 7.29 (m, 3H), 7.22 – 7.19 (m, 1H), 7.20 – 7.14 (m, 4H), 7.13 (d,  $J = 2.4$  Hz, 1H), 7.04 – 6.97 (m, 2H), 3.91 (s, 3H).  $^{13}\text{C}$  NMR (151 MHz,  $\text{CDCl}_3$ )  $\delta$  165.0, 148.7, 141.5, 135.5, 132.5, 131.1, 129.8, 128.9, 128.8, 128.6, 128.3, 127.0, 122.3, 95.6, 54.5. HRMS (ESI-TOF)  $m/z$   $[\text{M} + \text{Na}]^+$  Calcd for  $\text{C}_{22}\text{H}_{16}\text{Cl}_2\text{N}_2\text{O}_3\text{Na}$  449.0430; found 449.0432.

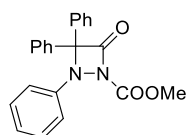

**7e**

**Methyl 4-oxo-2,3,3-triphenyl-1,2-diazetidone-1-carboxylate (7e):** The residue was

purified by flash chromatography (PE/EA = 60/1) giving the product **7e** as a white solid in 61% yield (33.0 mg), m. p. 124.5-125.5 °C.  $^1\text{H}$  NMR (600 MHz, Chloroform-*d*)  $\delta$  7.52 – 7.48 (m, 4H), 7.43 – 7.39 (m, 8H), 7.38 – 7.35 (m, 2H), 7.17 – 7.14 (m, 1H), 3.32 (s, 3H).  $^{13}\text{C}$  NMR (151 MHz,  $\text{CDCl}_3$ )  $\delta$  165.3, 159.0, 138.0, 134.9, 129.2, 128.8, 128.6, 128.1, 124.9, 116.5, 92.0, 53.3. HRMS (ESI-TOF)  $m/z$   $[\text{M} + \text{Na}]^+$  Calcd for  $\text{C}_{22}\text{H}_{18}\text{N}_2\text{O}_3\text{Na}$  381.1210; found 381.1216.

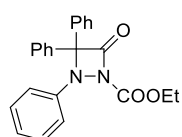

**7f**

**Ethyl 4-oxo-2,3,3-triphenyl-1,2-diazetidone-1-carboxylate (7f):** The residue was

purified by flash chromatography (PE/EA = 50/1) giving the product **7f** as a white solid in 47% yield (26.4 mg), m. p. 130.1-132.0 °C.  $^1\text{H}$  NMR (600 MHz, Chloroform-*d*)  $\delta$  7.53 – 7.48 (m, 4H), 7.43 – 7.38 (m, 8H), 7.38 – 7.34 (m, 2H), 7.14 (tt,  $J = 7.2, 1.2$  Hz, 1H), 3.82 (q,  $J = 7.2$  Hz, 2H), 0.80 (t,  $J = 7.2$  Hz, 3H).  $^{13}\text{C}$  NMR (151 MHz,  $\text{CDCl}_3$ )  $\delta$  165.6, 158.4, 138.1, 135.1, 129.2, 128.8, 128.6, 128.3, 124.9, 116.6, 91.7, 63.0, 13.6. HRMS (ESI-TOF)  $m/z$   $[\text{M} + \text{Na}]^+$  Calcd for  $\text{C}_{23}\text{H}_{20}\text{N}_2\text{O}_3\text{Na}$  395.1366; found 395.1374.

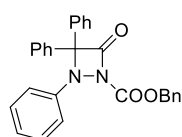

**7g**

**Benzyl 4-oxo-2,3,3-triphenyl-1,2-diazetidone-1-carboxylate (7g):** The residue was

purified by flash chromatography (PE/EA = 40/1) giving the product **7g** as a white solid in 71% yield (46.5 mg), m. p. 127.5-129.0 °C. <sup>1</sup>H NMR (600 MHz, Chloroform-*d*) δ 7.43 – 7.37 (m, 4H), 7.34 (d, *J* = 7.8 Hz, 2H), 7.31 – 7.25 (m, 7H), 7.22 – 7.15 (m, 4H), 7.08 (t, *J* = 7.2 Hz, 1H), 6.91 (d, *J* = 7.2 Hz, 2H), 4.69 (s, 2H). <sup>13</sup>C NMR (151 MHz, CDCl<sub>3</sub>) δ 164.5, 157.2, 137.0, 133.8, 133.5, 128.2, 127.8, 127.6, 127.4, 127.3, 127.1, 123.9, 115.6, 90.9, 67.6. HRMS (ESI-TOF) *m/z* [M + Na]<sup>+</sup> Calcd for C<sub>28</sub>H<sub>22</sub>N<sub>2</sub>O<sub>3</sub>Na 457.1523; found 457.1526.

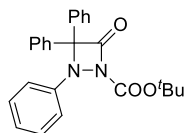

**7h** *Tert-butyl 4-oxo-2,3,3-triphenyl-1,2-diazetidene-1-carboxylate (7h)*: The residue was

purified by flash chromatography (PE/EA = 40/1) giving the product **7h** as a white solid in 63% yield (38.1 mg), m. p. 123.2-125.1 °C. <sup>1</sup>H NMR (600 MHz, Chloroform-*d*) δ 7.54 – 7.48 (m, 4H), 7.44 – 7.38 (m, 8H), 7.36 (t, *J* = 7.8 Hz, 2H), 7.13 (t, *J* = 7.2 Hz, 1H), 1.08 (s, 9H). <sup>13</sup>C NMR (151 MHz, CDCl<sub>3</sub>) δ 165.7, 156.9, 138.2, 135.5, 129.1, 128.8, 128.6, 128.5, 124.8, 116.6, 91.1, 83.2, 27.4. HRMS (ESI-TOF) *m/z* [M + Na]<sup>+</sup> Calcd for C<sub>25</sub>H<sub>24</sub>N<sub>2</sub>O<sub>3</sub>Na 423.1679; found 423.1680.

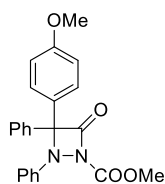

**7i** *Methyl 3-(4-methoxyphenyl)-4-oxo-2,3-diphenyl-1,2-diazetidene-1-carboxylate (7i)*:

The residue was purified by flash chromatography (PE/EA = 60/1) giving the product **7i** as a white solid in 88% yield (51.2 mg), m. p. 125.0-126.7 °C. <sup>1</sup>H NMR (600 MHz, Chloroform-*d*) δ 7.56 – 7.53 (m, 2H), 7.43 – 7.38 (m, 5H), 7.37 – 7.35 (m, 4H), 7.15 (tt, *J* = 7.2, 1.2 Hz, 1H), 6.92 – 6.89 (m, 2H), 3.82 (s, 3H), 3.36 (s, 3H). <sup>13</sup>C NMR (151 MHz, CDCl<sub>3</sub>) δ 165.6, 160.3, 159.1, 138.1, 135.2, 129.8, 129.0, 128.8, 128.5, 127.9, 127.0, 124.9, 116.5, 113.9, 92.0, 55.3, 53.3. HRMS (ESI-TOF) *m/z* [M + Na]<sup>+</sup> Calcd for C<sub>23</sub>H<sub>20</sub>N<sub>2</sub>O<sub>4</sub>Na 411.1315; found 411.1312.

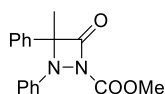

**7j** *Methyl 3-methyl-4-oxo-2,3-diphenyl-1,2-diazetidene-1-carboxylate (7j)*: The residue

was purified by flash chromatography (PE/EA = 50/1) giving the product **7j** as a white solid in 71% yield (31.5 mg), m. p. 120.7-122.5 °C. <sup>1</sup>H NMR (600 MHz, Chloroform-*d*) δ 7.63 – 7.58 (m, 2H), 7.40 (t, *J* = 7.2 Hz, 2H), 7.39 – 7.32 (m, 5H), 7.15 (tt, *J* = 6.6, 1.8 Hz, 1H), 3.80 (s, 3H), 2.02 (s, 3H). <sup>13</sup>C NMR (151 MHz, CDCl<sub>3</sub>) δ 167.1, 159.1, 137.9, 136.1, 128.84, 128.78, 125.8, 124.8, 116.5, 85.8, 53.8, 21.8. HRMS (ESI-TOF) *m/z* [M + Na]<sup>+</sup> Calcd for C<sub>17</sub>H<sub>16</sub>N<sub>2</sub>O<sub>3</sub>Na 319.1053; found 319.1056.

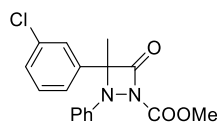

7k

**Methyl 3-(3-chlorophenyl)-3-methyl-4-oxo-2-phenyl-1,2-diazetidene-1-**

**carboxylate (7k):** The residue was purified by flash chromatography (PE/EA = 50/1) giving the product **7k** as colorless oil in 90% yield (44.6 mg). <sup>1</sup>H NMR (600 MHz, Chloroform-*d*) δ 7.63 – 7.61 (m, 1H), 7.51 – 7.47 (m, 1H), 7.40 – 7.31 (m, 6H), 7.16 (tt, *J* = 7.2, 1.2 Hz, 1H), 3.86 (s, 3H), 2.00 (s, 3H). <sup>13</sup>C NMR (151 MHz, CDCl<sub>3</sub>) δ 165.1, 157.6, 137.1, 136.5, 133.6, 128.9, 127.72, 127.70, 124.9, 123.8, 122.7, 115.4, 83.8, 52.8, 20.8. HRMS (ESI-TOF) *m/z* [M + Na]<sup>+</sup> Calcd for C<sub>17</sub>H<sub>15</sub>ClN<sub>2</sub>O<sub>3</sub>Na 353.0663; found 353.0667.

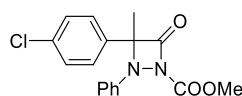

7l

**Methyl 3-(4-chlorophenyl)-3-methyl-4-oxo-2-phenyl-1,2-diazetidene-1-**

**carboxylate (7l):** The residue was purified by flash chromatography (PE/EA = 50/1) giving the product **7l** as a white solid in 77% yield (38.1 mg), m. p. 129.7-131.2 °C. <sup>1</sup>H NMR (600 MHz, Chloroform-*d*) δ 7.56 – 7.52 (m, 2H), 7.38 – 7.34 (m, 4H), 7.33 – 7.30 (m, 2H), 7.16 (tt, *J* = 7.2, 1.2 Hz, 1H), 3.83 (s, 3H), 1.99 (s, 3H). <sup>13</sup>C NMR (151 MHz, CDCl<sub>3</sub>) δ 166.6, 158.9, 137.7, 134.83, 134.78, 129.0, 128.9, 127.2, 125.0, 116.6, 85.1, 53.9, 21.9. HRMS (ESI-TOF) *m/z* [M + Na]<sup>+</sup> Calcd for C<sub>17</sub>H<sub>15</sub>ClN<sub>2</sub>O<sub>3</sub>Na 353.0663; found 353.0665.

## 6. Gram-scale synthesis of compound 5a

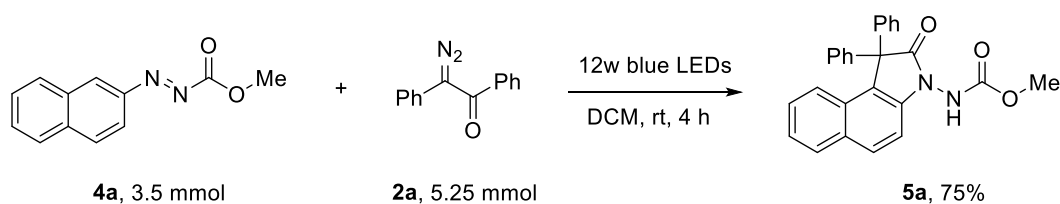

A mixture of azonaphthalenes **1a** (3.5 mmol, 750 mg) and  $\alpha$ -diazo ketones **2a** (5.25 mmol, 1.17 g) was stirred in CH<sub>2</sub>Cl<sub>2</sub> (10.0 mL) at room temperature and then irradiated under blue LEDs for 4 hours. Until the reaction completed (monitored by TLC), the reaction mixture was purified by flash chromatography on silica gel (PE/EA = 5/1) to give compound **5a** as a white solid in 75% yield (1.07 g).

## 7. Synthesis of product 8

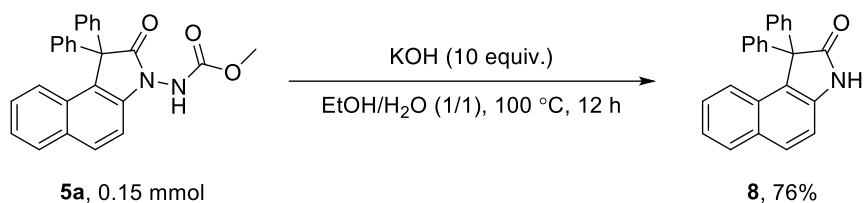

To the solution of KOH (1.5 mmol, 84.16 mg) in H<sub>2</sub>O (0.5 mL) was added the solution of **5a** (0.15 mmol, 61.27 mg). Then, the reaction mixture was stirred at 100 °C for 12 hours. Until the reaction completed (monitored by TLC), the reaction mixture was concentrated purified by flash chromatography on silica gel (PE/EA = 8/1) to give compound **8** as a white solid in 76% yield (38 mg).

### Analytical data of compounds 8

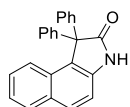

**8** *1,1-diphenyl-1,3-dihydro-2H-benzof[e]indol-2-one (8)*: The residue was purified by filtration (washing) to give the product **8** as a white solid in 76% yield (38.0 mg), m. p. 310.1-311.7 °C. <sup>1</sup>H NMR (600 MHz, Chloroform-*d*) δ 8.82 (s, 1H), 7.78 (d, *J* = 8.4 Hz, 1H), 7.74 (d, *J* = 7.8 Hz, 1H), 7.38 (d, *J* = 8.4 Hz, 1H), 7.33 (d, *J* = 7.2 Hz, 4H), 7.22 – 7.18 (m, 8H), 7.17 – 7.14 (m, 1H). <sup>13</sup>C NMR (151 MHz, CDCl<sub>3</sub>) δ 181.1, 138.2, 137.2, 129.6, 129.3, 129.2, 128.3, 128.2, 127.4, 126.5, 126.0, 124.9, 122.6, 122.3, 110.6, 63.0. HRMS (ESI-TOF) *m/z* [M + Na]<sup>+</sup> Calcd for C<sub>24</sub>H<sub>17</sub>NONa 358.1202; found 358.1199.

## 8. Synthesis of product 9

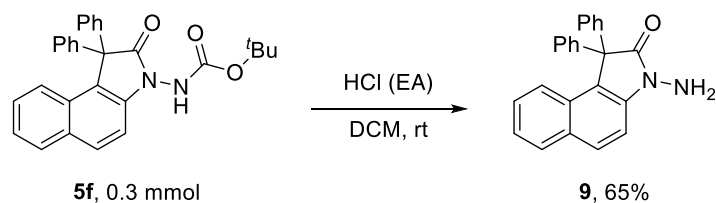

To the solution of **5f** (0.3 mmol, 135 mg) in CH<sub>2</sub>Cl<sub>2</sub> (2 mL) was added hydrogen chloride ethyl acetate solution (0.1 mL, 4.0 M in ethyl acetate) dropwise and the reaction was stirred at room temperature for 20 hours. Until the reaction completed (monitored by TLC), the reaction mixture was purified by flash chromatography on silica gel (PE/EA = 6/1) to give compound **9** as a white solid in 65% yield (68 mg).

### Analytical data of compounds 9

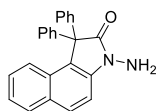

9

**3-amino-1,1-diphenyl-1,3-dihydro-2H-benzof[e]indol-2-one (9):** The residue was purified by flash chromatography (PE/EA = 3/1) giving the product **9** as a white solid in 65% yield (68.0 mg), m. p. 228.5-229.7 °C. <sup>1</sup>H NMR (600 MHz, Chloroform-*d*) δ 7.88 (d, *J* = 7.2 Hz, 1H), 7.77 (d, *J* = 7.2 Hz, 1H), 7.54 (d, *J* = 8.4 Hz, 1H), 7.37 (d, *J* = 7.2 Hz, 1H), 7.31 – 7.25 (m, 4H), 7.23 – 7.17 (m, 6H), 7.19 – 7.13 (m, 2H), 3.21 (s, 2H). <sup>13</sup>C NMR (151 MHz, CDCl<sub>3</sub>) δ 179.3, 141.0, 139.0, 131.0, 130.5, 129.8, 129.5, 129.3, 128.4, 127.6, 127.0, 123.7, 123.4, 123.1, 110.5, 62.4. HRMS (ESI-TOF) *m/z* [M + Na]<sup>+</sup> Calcd for C<sub>24</sub>H<sub>18</sub>N<sub>2</sub>ONa 373.1311; found 373.1306.

## 9. Synthesis of product 10

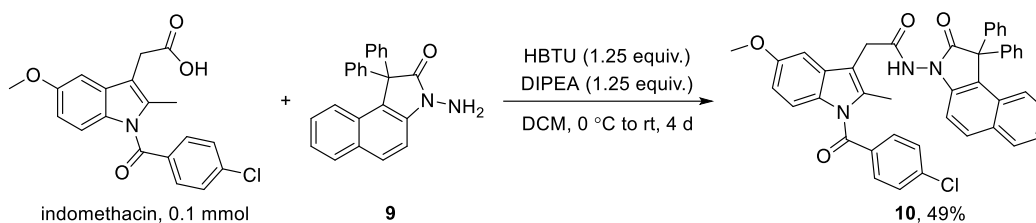

To the solution of indomethacin (0.1 mmol, 35.78 mg) in CH<sub>2</sub>Cl<sub>2</sub> (2 mL) was added HBTU (0.125 mmol, 47.41 mg) at 0 °C. This solution was stirred for 30 min, followed by addition of **9** (0.1 mmol, 35.04 mg) and DIPEA (0.125 mmol, 16.16 mg). Then, the solution was warmed to RT and stirred for 4 days. Until the reaction completed (monitored by TLC), the reaction mixture was quenched with 50 mL of H<sub>2</sub>O and extracted with DCM (3×50 mL). The organic layers were collected and dried with Na<sub>2</sub>SO<sub>4</sub> and concentrated under reduced pressure. The residue was purified by flash chromatography on silica gel (PE/EA = 8/1) to give compound **10** as a white solid in 49% yield (33.5 mg).

### Analytical data of compounds 10

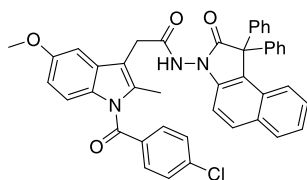

10

**2-(1-(4-chlorobenzoyl)-5-methoxy-2-methyl-1H-indol-3-yl)-N-(2-oxo-1,1-diphenyl-1,2-dihydro-3H-benzof[e]indol-3-yl)acetamide (10):** The residue was purified by flash chromatography (PE/EA = 8/1) giving the product **10** as a white solid in 49% yield (33.5 mg), m. p. 158.9-160.4 °C. <sup>1</sup>H NMR (700 MHz, Chloroform-*d*) δ 7.79 (d, *J* = 8.4 Hz, 1H), 7.74 (d, *J* = 8.4 Hz, 1H), 7.68 (s, 1H), 7.59 (d, *J* = 7.7 Hz, 2H), 7.38 (t, *J* = 7.7 Hz, 3H), 7.35 (d, *J* = 7.7 Hz, 4H), 7.22 – 7.17 (m, 6H), 7.16 – 7.13 (m, 2H), 7.05 (s, 1H), 7.02 (d, *J* = 8.4 Hz, 1H), 6.83 (d, *J* = 9.1 Hz, 1H), 6.65 (d, *J* = 8.4 Hz, 1H), 3.84 (s, 2H), 3.79 (s, 3H), 2.41 (s, 3H). <sup>13</sup>C NMR (176 MHz, CDCl<sub>3</sub>) δ 178.4, 169.2, 168.3, 156.5, 139.7, 139.4, 136.8, 133.4, 131.3, 131.2, 130.9, 130.5, 130.0, 129.9, 129.44, 129.38, 129.3, 128.4,

127.7, 127.2, 124.0, 123.4, 123.1, 115.3, 112.9, 111.1, 109.3, 100.6, 62.2, 55.9, 30.7, 13.5. HRMS (ESI-TOF)  $m/z$   $[M + Na]^+$  Calcd for  $C_{43}H_{32}ClN_3O_4Na$  712.1974; found 712.1973.

## 10. Synthesis of product 12

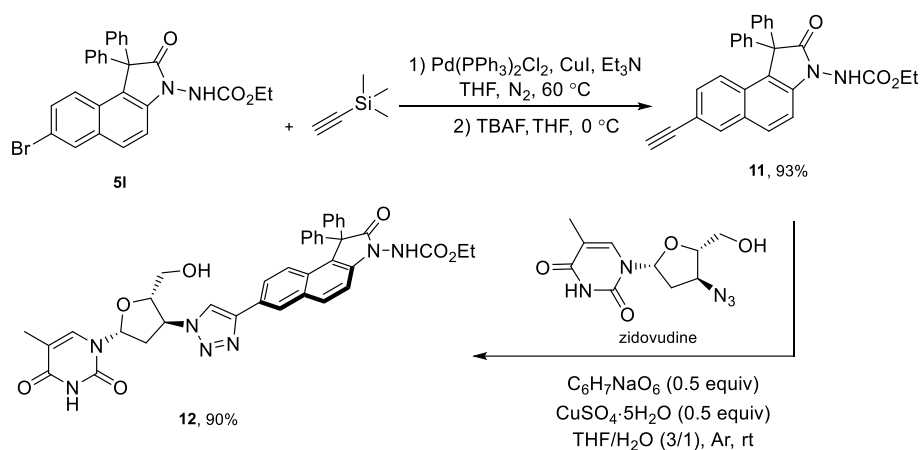

Compound **11** were prepared according to the improved literature procedures.<sup>3</sup> Then, under argon atmosphere, a flame-dried 10 mL schlenk tube was charged with compound **11** (20.09 mg, 0.045 mmol), zidovudine (14.43 mg, 0.054 mmol) and a stir bar was added a freshly prepared solution of  $CuSO_4 \cdot 5H_2O$  (5.62 mg, 0.0225 mmol.), THF (1.5 mL) and sodium ascorbate (4.46 mg, 0.0225 mmol.) in  $H_2O$  (0.5 mL). the reaction mixture was concentrated purified by flash chromatography on silica gel (DCM/MeOH = 20/1) to give compound **12** as a white solid in 90% yield (29 mg).

3. X. Fan, C. He, M. Ji, X. Sun, H. Luo, C. Li, H. Tong, W. Zhang, Z. Sun and W. Chu, *Chem. Commun.*, 2022, **58**, 6348-6351.

### Analytical data of compounds 11 and 12

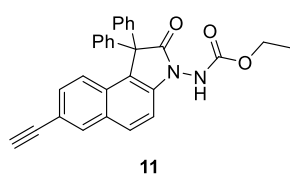

*Ethyl (7-ethynyl-2-oxo-1,1-diphenyl-1,2-dihydro-3H-benzo[e]indol-3-*

*yl)carbamate (11)*: The residue was purified by flash chromatography (PE/EA = 25/1) giving the product **11** as a white solid in 93% yield (41.6 mg), m. p. 230.5-232.3 °C.  $^1H$  NMR (700 MHz, Chloroform-*d*)  $\delta$  8.05 (s, 1H), 7.91 (d,  $J = 8.4$  Hz, 1H), 7.47 – 7.38 (m, 6H), 7.33 – 7.26 (m, 7H), 7.15 (s, 1H), 4.32 (s, 2H), 3.12 (s, 1H), 1.37 – 1.13 (m, 3H).  $^{13}C$  NMR (176 MHz,  $CDCl_3$ )  $\delta$  178.8, 155.3, 140.7, 133.8, 130.7, 130.6, 129.9, 129.6, 129.3, 128.5, 127.8, 123.6, 123.1, 117.6, 110.4, 83.6, 77.5, 63.1, 61.9, 14.3. HRMS (ESI-TOF)  $m/z$   $[M + Na]^+$  Calcd for  $C_{29}H_{22}N_2O_3Na$  469.1523; found 469.1532.

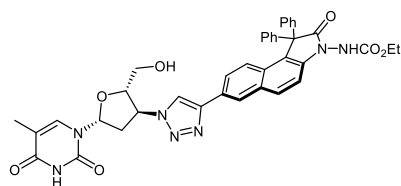

12

*Ethyl (7-(1-((2S,3S,5R)-2-(hydroxymethyl)-5-(5-methyl-2,4-*

*dioxo-3,4-dihydropyrimidin-1(2H)-yl)tetrahydrofuran-3-yl)-1H-1,2,3-triazol-4-yl)-2-oxo-1,1-*

*diphenyl-1,2-dihydro-3H-benzo[e]indol-3-yl)carbamate (12):* The residue was purified by flash

chromatography (DCM/MeOH = 20/1) giving the product **12** as a white solid in 90% yield (29 mg), m.

p. 198.1–200.0 °C. <sup>1</sup>H NMR (700 MHz, Chloroform-*d*) δ 8.29 (s, 1H), 8.17 (s, 1H), 7.92 (d, *J* = 8.4 Hz,

1H), 7.79 (s, 1H), 7.63 – 7.54 (m, 1H), 7.47 (d, *J* = 8.4 Hz, 1H), 7.43 – 7.32 (m, 5H), 7.29 (s, 1H), 7.26

– 7.21 (m, 5H), 6.92 (s, 1H), 6.77 (s, 1H), 6.14 (t, *J* = 7.0 Hz, 1H), 5.42 – 5.39 (m, 1H), 4.41 (t, *J* = 2.8

Hz, 1H), 4.25 (s, 2H), 3.98 (dd, *J* = 13.6, 2.1 Hz, 1H), 3.73 (dd, *J* = 13.6, 2.1 Hz, 1H), 3.14 – 2.86 (m,

3H), 1.88 (s, 3H), 1.38 – 1.25 (m, 3H). <sup>13</sup>C NMR (176 MHz, MeOD) δ 179.0, 165.0, 156.1, 150.9, 140.5,

136.9, 131.4, 130.8, 129.4, 129.3, 128.9, 128.1, 127.7, 127.3, 125.71, 125.68, 124.5, 123.8, 123.1, 120.7,

110.3, 110.0, 85.3, 85.0, 62.2, 60.8, 59.8, 37.7, 13.4, 11.1. HRMS (ESI-TOF) *m/z* [M + Na]<sup>+</sup> Calcd for

C<sub>39</sub>H<sub>35</sub>N<sub>7</sub>O<sub>7</sub>Na 736.2490; found 736.2493.

## 11. Synthesis of product 13

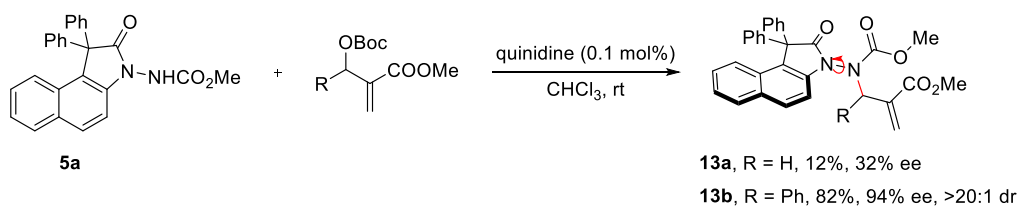

To the solution of **5a** (0.05 mmol, 20.42 mg) in CHCl<sub>3</sub> (1.0 mL) was added MBH-adducts (0.06 mmol). Then, quinidine (10 mol%) was added and the reaction mixture was stirred at room temperature for 3 hours. Until the reaction completed (monitored by TLC), the reaction mixture was purified by flash chromatography on silica gel (PE/EA = 8/1) to give compounds **13** as white solids.

### Analytical data of compounds 13a and 13b

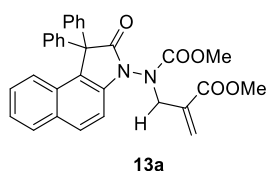

*Methyl 2-(((methoxycarbonyl)(2-oxo-1,1-diphenyl-1,2-dihydro-3H-*

*benzo[e]indol-3-yl)amino)methyl)acrylate (13a):* The residue was purified by flash chromatography

(PE/EA = 8/1) giving the product **13a** as a white solid in 12% yield (3.0 mg), m. p. 166.3–168.1 °C. <sup>1</sup>H

NMR (600 MHz, Chloroform-*d*) δ 7.83 – 7.72 (m, 2H), 7.38 – 7.33 (m, 3H), 7.32 – 7.08 (m, 10H), 7.07

– 7.02 (m, 1H), 5.92 (s, 1H), 5.37 (s, 1H), 4.78 (d, *J* = 14.4 Hz, 1H), 4.29 (d, *J* = 14.4 Hz, 1H), 3.64 (s,

3H), 3.52 (s, 3H). <sup>13</sup>C NMR (151 MHz, CDCl<sub>3</sub>) δ 177.3, 166.0, 155.7, 140.5, 139.5, 137.2, 133.8, 132.0,



131.2, 130.5, 130.0, 129.7, 129.4, 129.0, 128.39, 128.35, 127.9, 127.4, 127.2, 124.0, 123.4, 122.8, 109.3, 62.1, 54.0, 52.0, 49.7. HRMS (ESI-TOF)  $m/z$   $[M + Na]^+$  Calcd for  $C_{31}H_{26}N_2O_5Na$  529.1734; found 529.1731. The *ee* value was determined by the chiral HPLC analysis (OD-H column, *n*-hexane/*i*-propanol = 90:10,  $v = 1$  mL/min,  $\lambda = 254.0$  nm;  $t_{minor} = 12.88$  min,  $t_{major} = 18.7$  min).

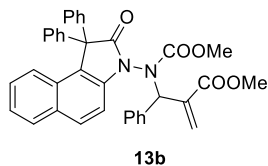

**Methyl 2-(((methoxycarbonyl)(2-oxo-1,1-diphenyl-1,2-dihydro-3H-**

**benzo[e]indol-3-yl)amino)(phenyl)methyl)acrylate (13b):** The residue was purified by flash chromatography (PE/EA = 8/1) giving the product **13b** as a white solid in 82% yield (24.0 mg), m. p. 180.5–182.1 °C.  $^1H$  NMR (600 MHz, Chloroform-*d*)  $\delta$  7.96 (d,  $J = 8.4$  Hz, 1H), 7.85 (d,  $J = 8.4$  Hz, 1H), 7.46 (d,  $J = 9.0$  Hz, 1H), 7.36 (d,  $J = 7.8$  Hz, 2H), 7.34 (d,  $J = 8.4$  Hz, 1H), 7.31 – 7.26 (m, 4H), 7.25 – 7.22 (m, 3H), 7.21 – 7.17 (m, 4H), 6.98 (t,  $J = 7.2$  Hz, 2H), 6.92 (t,  $J = 7.2$  Hz, 2H), 6.38 (s, 1H), 6.35 (s, 1H), 6.02 (s, 1H), 3.65 (s, 3H), 3.58 (s, 3H).  $^{13}C$  NMR (151 MHz,  $CDCl_3$ )  $\delta$  178.4, 165.9, 156.0, 140.2, 139.0, 136.9, 131.0, 130.2, 129.9, 129.6, 129.3, 129.1, 128.8, 128.22, 128.16, 128.0, 127.4, 127.3, 127.1, 123.9, 123.5, 122.9, 109.9, 64.7, 61.4, 53.9, 52.0. HRMS (ESI-TOF)  $m/z$   $[M + Na]^+$  Calcd for  $C_{37}H_{30}N_2O_5Na$  605.2047; found 605.2050. The *ee* value was determined by the chiral HPLC analysis (OD-H column, *n*-hexane/*i*-propanol = 90:10,  $v = 1$  mL/min,  $\lambda = 254.0$  nm;  $t_{major} = 12.6$  min,  $t_{minor} = 15.6$  min).

## 12. X-ray crystal structures of 3a, 5b and 7a

To a 10 mL tube containing **3a** (30.0 mg) was added a mixture solvent (methylene chloride /ethyl acetate = 10:1, v/v) (4 mL). A clear solution was obtained through ultrasound treatment and was kept at room temperature and the crystals were obtained after the solvent evaporated, which were characterized by single crystal X-ray diffraction. X-ray diffraction experiment was carried out on an Agilent D8 QUEST and the data obtained were deposited at the Cambridge Crystallographic Data Centre.

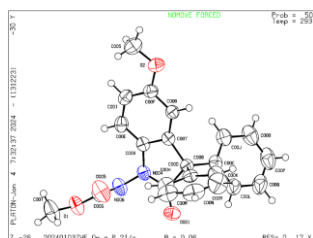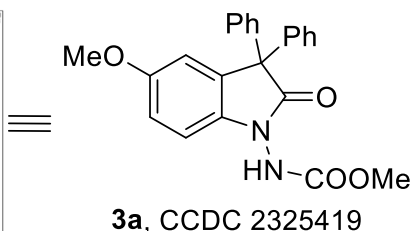

(Ellipsoid contour probability 50%)

|                            |                      |
|----------------------------|----------------------|
| <b>Identification code</b> | <b>3a</b>            |
| <b>Chemical formula</b>    | $C_{23}H_{20}N_2O_4$ |
| <b>Formula weight</b>      | 388.41 g/mol         |
| <b>Temperature</b>         | 293(2) K             |
| <b>Wavelength</b>          | 1.54178 Å            |



(Ellipsoid contour probability 50%)

|                                         |                                                                                                                           |
|-----------------------------------------|---------------------------------------------------------------------------------------------------------------------------|
| <b>Identification code</b>              | <b>5b</b>                                                                                                                 |
| <b>Chemical formula</b>                 | C <sub>27</sub> H <sub>22</sub> N <sub>2</sub> O <sub>3</sub>                                                             |
| <b>Formula weight</b>                   | 422.46 g/mol                                                                                                              |
| <b>Temperature</b>                      | 298(2) K                                                                                                                  |
| <b>Wavelength</b>                       | 1.54184 Å                                                                                                                 |
| <b>Crystal system</b>                   | monoclinic                                                                                                                |
| <b>Space group</b>                      | P2(1)/c                                                                                                                   |
| <b>Unit cell dimensions</b>             | a = 11.2636(3) Å α = 90°<br>b = 14.7245(4) Å β = 106.7092(10)°<br>c = 13.7242(3) Å γ = 90°                                |
| <b>Volume</b>                           | 2180.06(12) Å <sup>3</sup>                                                                                                |
| <b>Z</b>                                | 44                                                                                                                        |
| <b>Density (calculated)</b>             | 1.287 g/cm <sup>3</sup>                                                                                                   |
| <b>Absorption coefficient</b>           | 0.679 mm <sup>-1</sup>                                                                                                    |
| <b>F (000)</b>                          | 888                                                                                                                       |
| <b>Radiation</b>                        | CuKα (λ = 1.54178)                                                                                                        |
| <b>Theta range for data collection</b>  | 6.724 to 137.472°                                                                                                         |
| <b>Index ranges</b>                     | -16 ≤ h ≤ 16, -17 ≤ k ≤ 17, -13 ≤ l ≤ 13                                                                                  |
| <b>Reflections collected</b>            | 35458                                                                                                                     |
| <b>Independent reflections</b>          | 4018 [R(int) = 0.0567, R(sigma) = 0.0294]                                                                                 |
| <b>Absorption correction</b>            | Multi-Scan                                                                                                                |
| <b>Structure solution technique</b>     | direct methods                                                                                                            |
| <b>Structure solution program</b>       | XT, VERSION 2014/5                                                                                                        |
| <b>Data / restraints / parameters</b>   | 4018 / 0 / 290                                                                                                            |
| <b>Goodness-of-fit on F<sup>2</sup></b> | 1.026                                                                                                                     |
| <b>Final R indices</b>                  | I > 2σ(I) R <sub>1</sub> = 0.0489, wR <sub>2</sub> = 0.1308<br>all data R <sub>1</sub> = 0.0597, wR <sub>2</sub> = 0.1457 |
| <b>Largest diff. peak and hole</b>      | 0.15 and -0.20 eÅ <sup>-3</sup>                                                                                           |

To a 10 mL tube containing **7b** (20.0 mg) was added a mixture solvent (methylene chloride /ethyl acetate = 20:1, v/v) (4 mL). A clear solution was obtained through ultrasound treatment and was kept at room temperature and the crystals were obtained after the solvent evaporated, which were characterized by single crystal X-ray diffraction. X-ray diffraction experiment was carried out on an Agilent D8 QUEST and the data obtained were deposited at the Cambridge Crystallographic Data Centre.

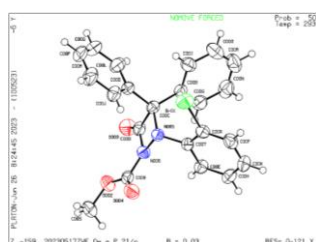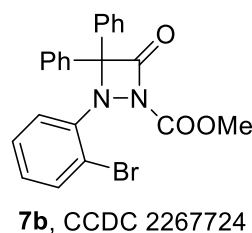

(Ellipsoid contour probability 50%)

|                                            |                                                                                                                                                                       |
|--------------------------------------------|-----------------------------------------------------------------------------------------------------------------------------------------------------------------------|
| <b>Identification code</b>                 | <b>7b</b>                                                                                                                                                             |
| <b>Chemical formula</b>                    | C <sub>22</sub> H <sub>17</sub> BrN <sub>2</sub> O <sub>3</sub>                                                                                                       |
| <b>Formula weight</b>                      | 437.28 g/mol                                                                                                                                                          |
| <b>Temperature</b>                         | 293(2) K                                                                                                                                                              |
| <b>Wavelength</b>                          | 1.54178 Å                                                                                                                                                             |
| <b>Crystal system</b>                      | monoclinic                                                                                                                                                            |
| <b>Space group</b>                         | P 1 2 <sub>1</sub> /c 1                                                                                                                                               |
| <b>Unit cell dimensions</b>                | a = 12.1826(4) Å $\alpha = 90^\circ$<br>b = 7.4970(2) Å $\beta = 92.662(2)^\circ$<br>c = 21.2926(7) Å $\gamma = 90^\circ$                                             |
| <b>Volume</b>                              | 1942.62(10) Å <sup>3</sup>                                                                                                                                            |
| <b>Z</b>                                   | 4                                                                                                                                                                     |
| <b>Density (calculated)</b>                | 1.495 g/cm <sup>3</sup>                                                                                                                                               |
| <b>Absorption coefficient</b>              | 3.098 mm <sup>-1</sup>                                                                                                                                                |
| <b>F (000)</b>                             | 888                                                                                                                                                                   |
| <b>Theta range for data collection</b>     | 3.63 to 68.55°                                                                                                                                                        |
| <b>Index ranges</b>                        | -14 ≤ h ≤ 14, -9 ≤ k ≤ 9, -25 ≤ l ≤ 25                                                                                                                                |
| <b>Reflections collected</b>               | 24905                                                                                                                                                                 |
| <b>Independent reflections</b>             | 3561 [R(int) = 0.0633]                                                                                                                                                |
| <b>Coverage of independent reflections</b> | 99.6%                                                                                                                                                                 |
| <b>Absorption correction</b>               | Multi-Scan                                                                                                                                                            |
| <b>Structure solution technique</b>        | direct methods                                                                                                                                                        |
| <b>Structure solution program</b>          | SHELXT 2014/5 (Sheldrick, 2014)                                                                                                                                       |
| <b>Refinement method</b>                   | Full-matrix least-squares on F <sup>2</sup>                                                                                                                           |
| <b>Refinement program</b>                  | SHELXL-2016/6 (Sheldrick, 2016)                                                                                                                                       |
| <b>Function minimized</b>                  | $\Sigma w (F_o^2 - F_c^2)^2$                                                                                                                                          |
| <b>Data / restraints / parameters</b>      | 3561 / 0 / 254                                                                                                                                                        |
| <b>Goodness-of-fit on F<sup>2</sup></b>    | 1.051                                                                                                                                                                 |
| <b><math>\Delta/\sigma_{max}</math></b>    | 0.001                                                                                                                                                                 |
| <b>Final R indices</b>                     | 3129 data; I > 2σ(I) R <sub>1</sub> = 0.0331, wR <sub>2</sub> = 0.0858<br>all data R <sub>1</sub> = 0.0384, wR <sub>2</sub> = 0.0899                                  |
| <b>Weighting scheme</b>                    | w = 1/[σ <sup>2</sup> (F <sub>o</sub> <sup>2</sup> ) + (0.0424P) <sup>2</sup> + 0.8764P]<br>where P = (F <sub>o</sub> <sup>2</sup> + 2F <sub>c</sub> <sup>2</sup> )/3 |
| <b>Absolute structure parameter</b>        | 0.00(5)                                                                                                                                                               |
| <b>Largest diff. peak and hole</b>         | 0.476 and -0.262 eÅ <sup>-3</sup>                                                                                                                                     |
| <b>R.M.S. deviation from mean</b>          | 0.051 eÅ <sup>-3</sup>                                                                                                                                                |

### 13. <sup>1</sup>H NMR, <sup>13</sup>C NMR and HPLC Spectra

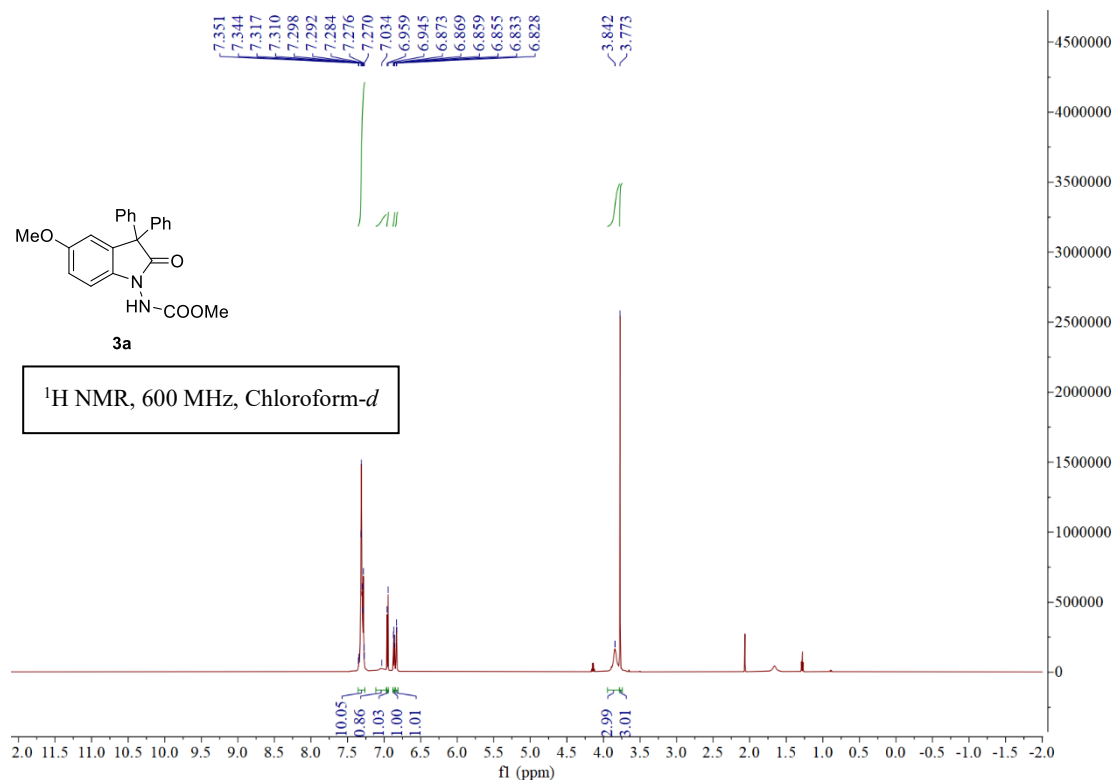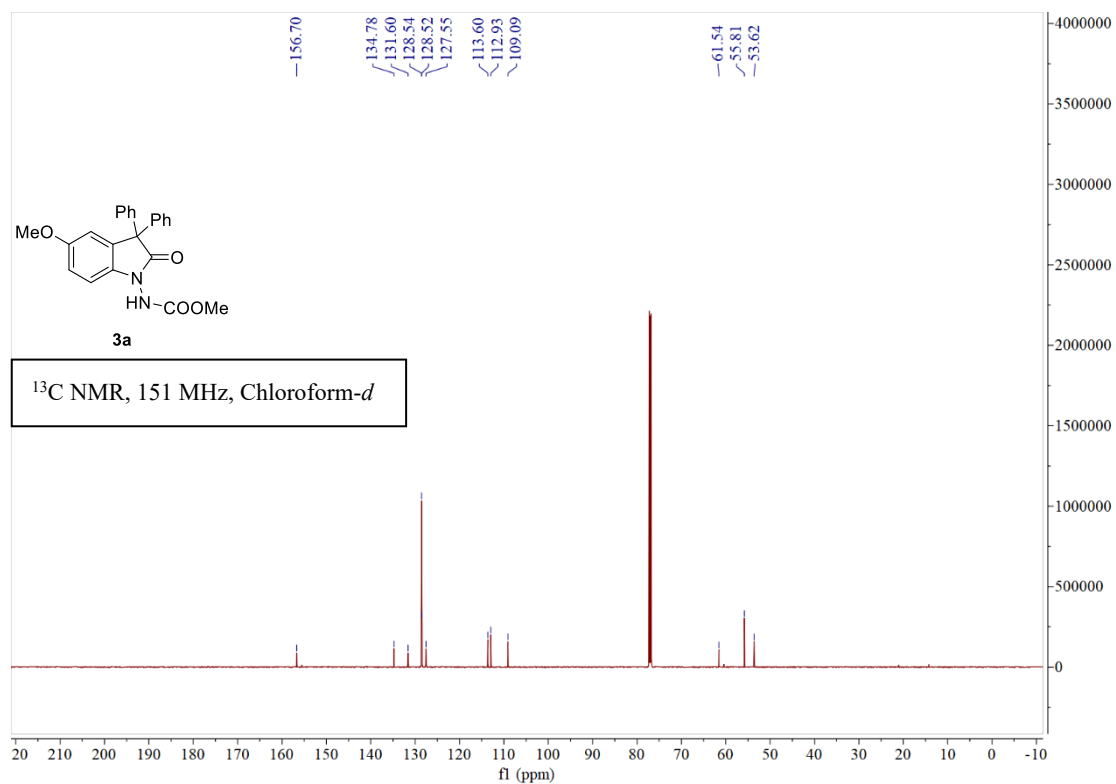

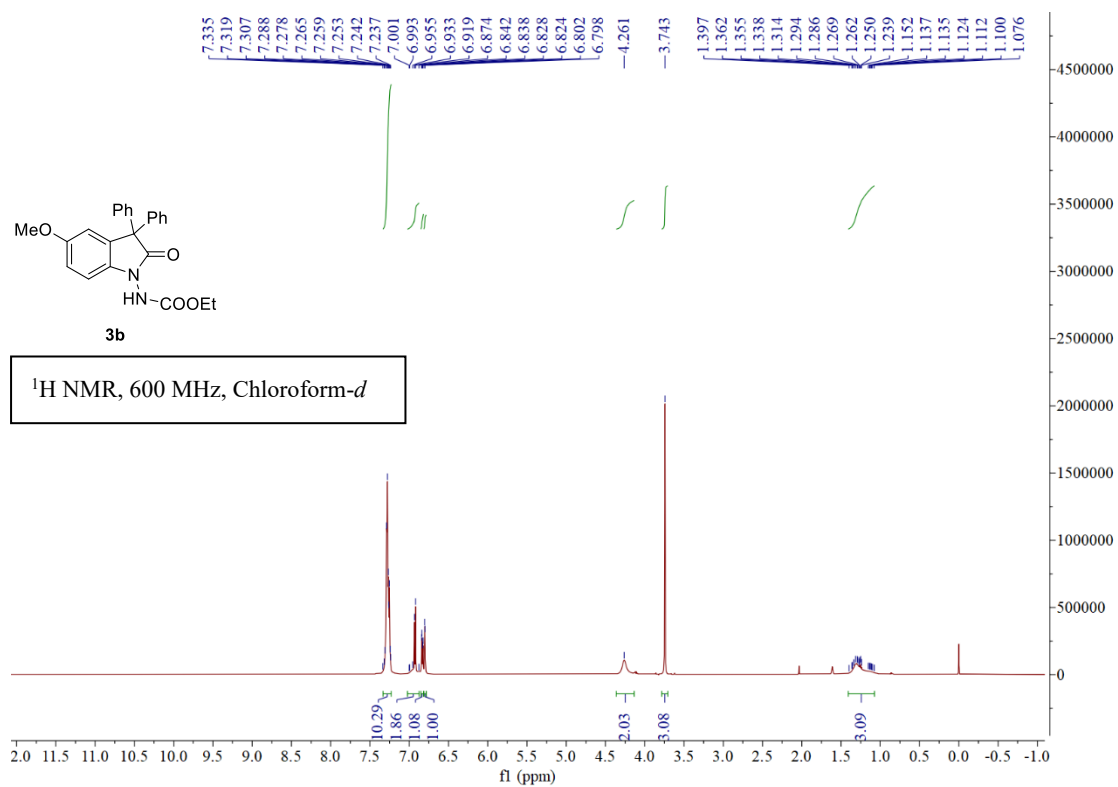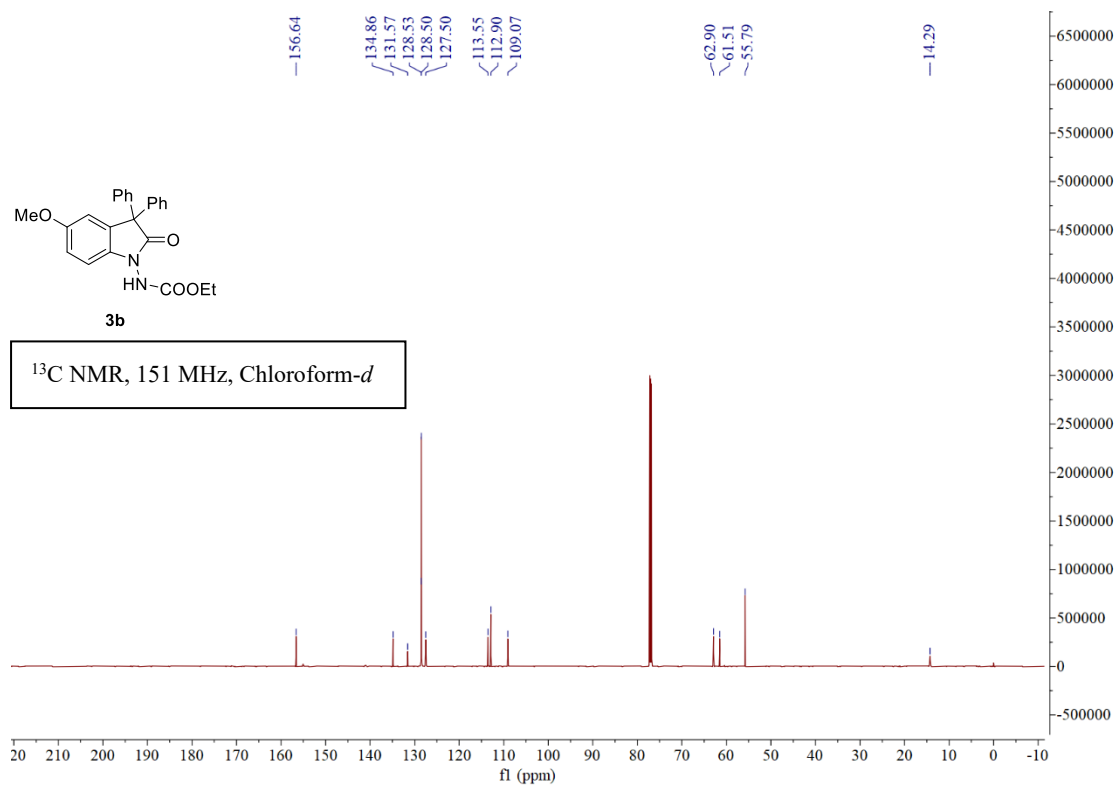

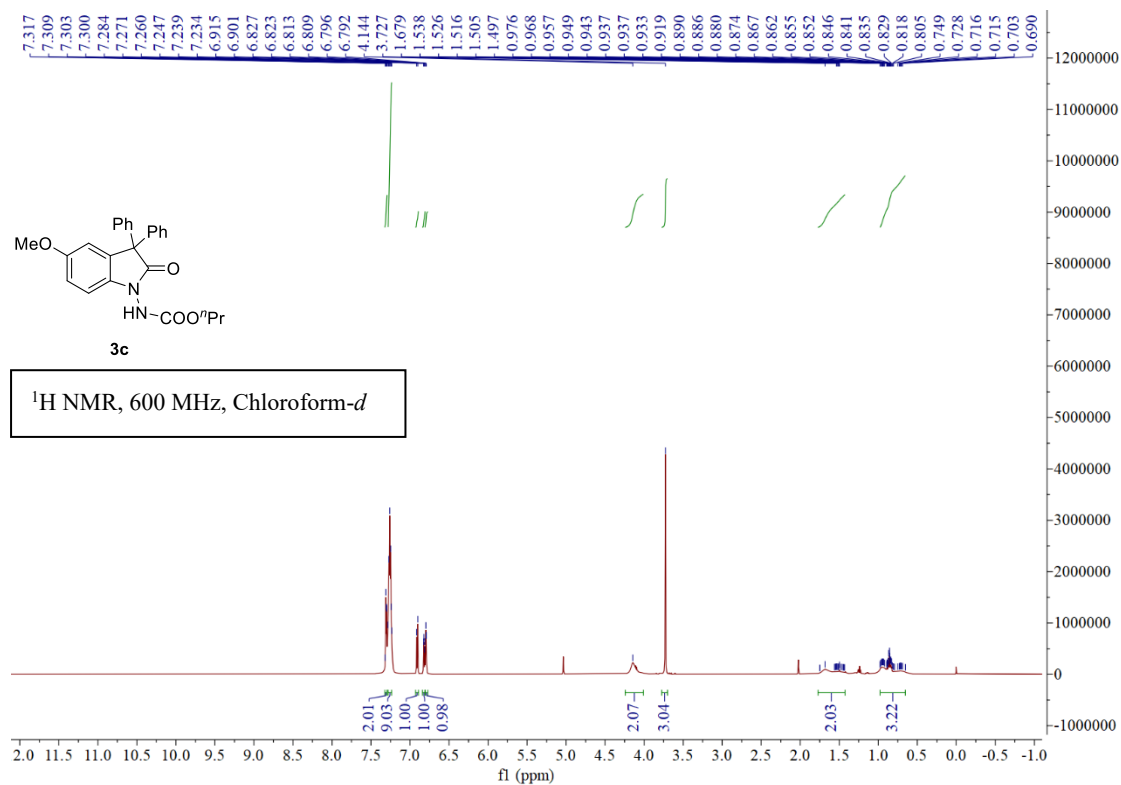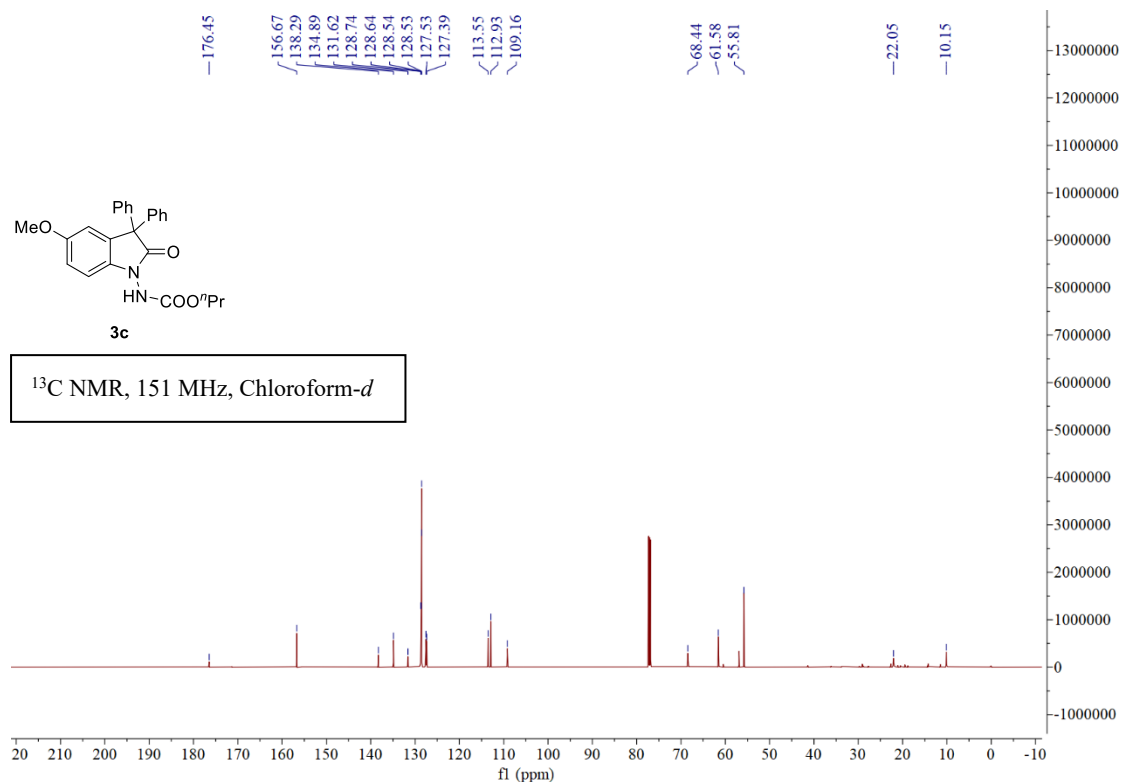

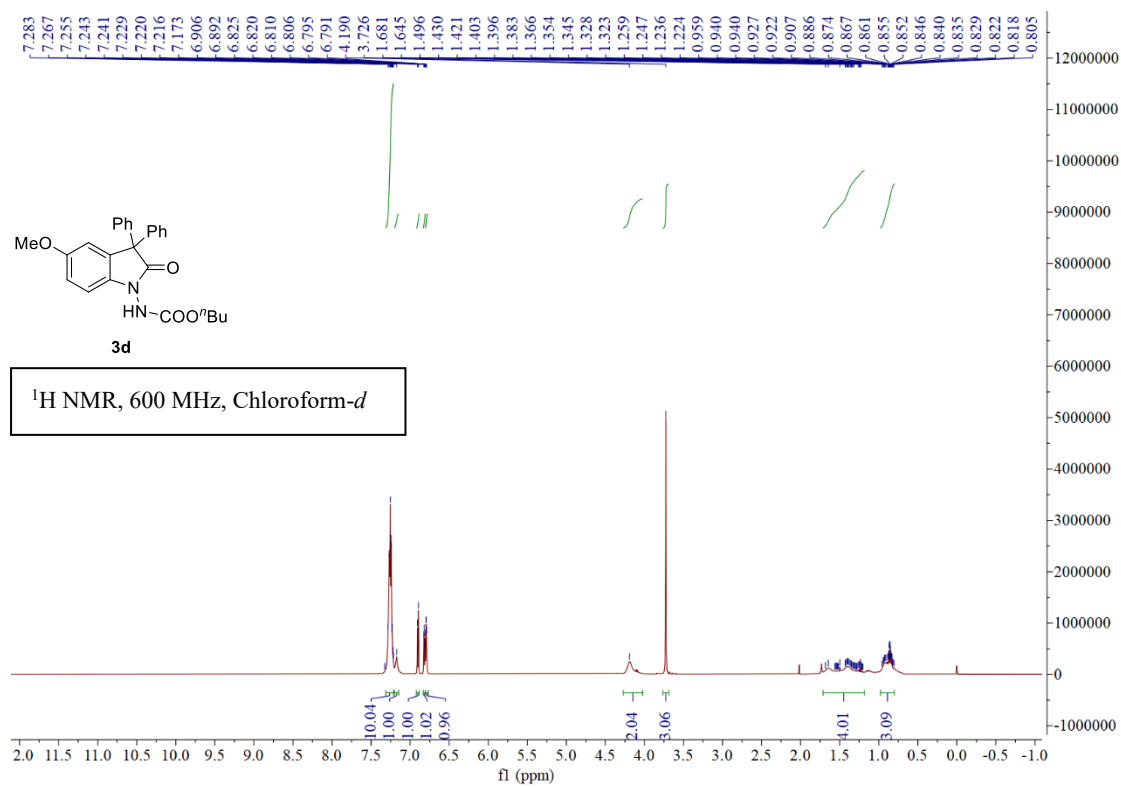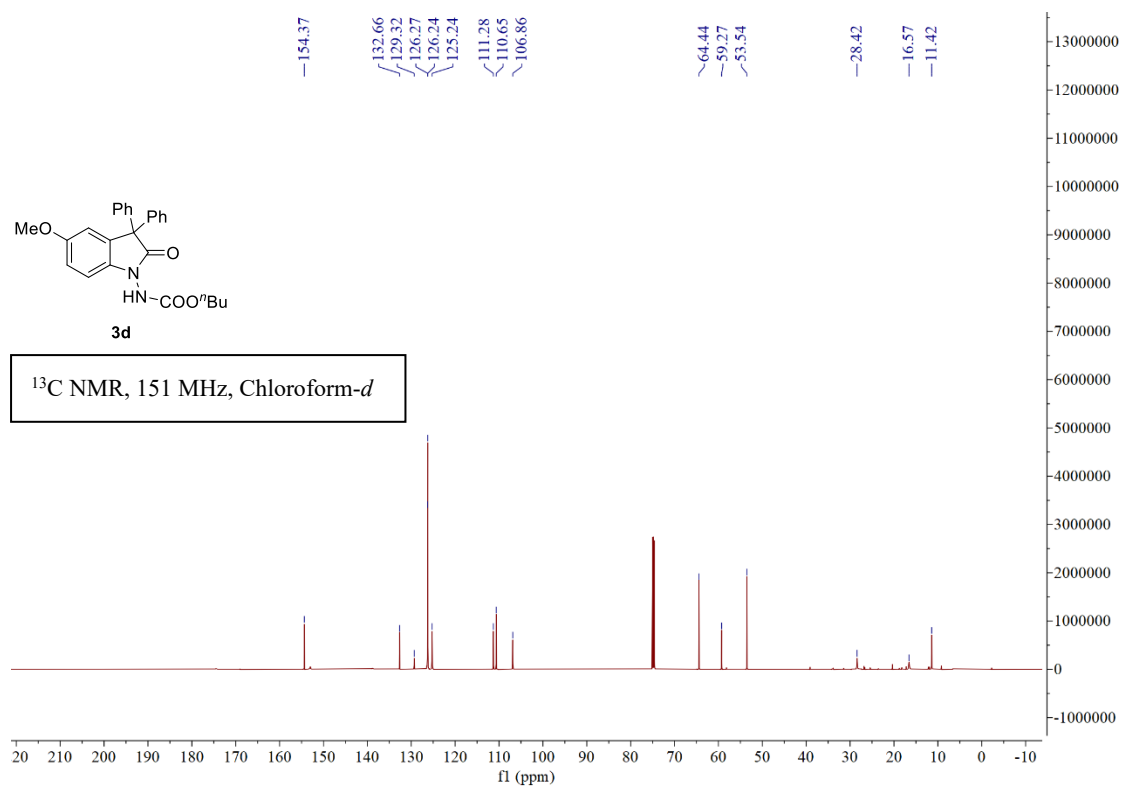



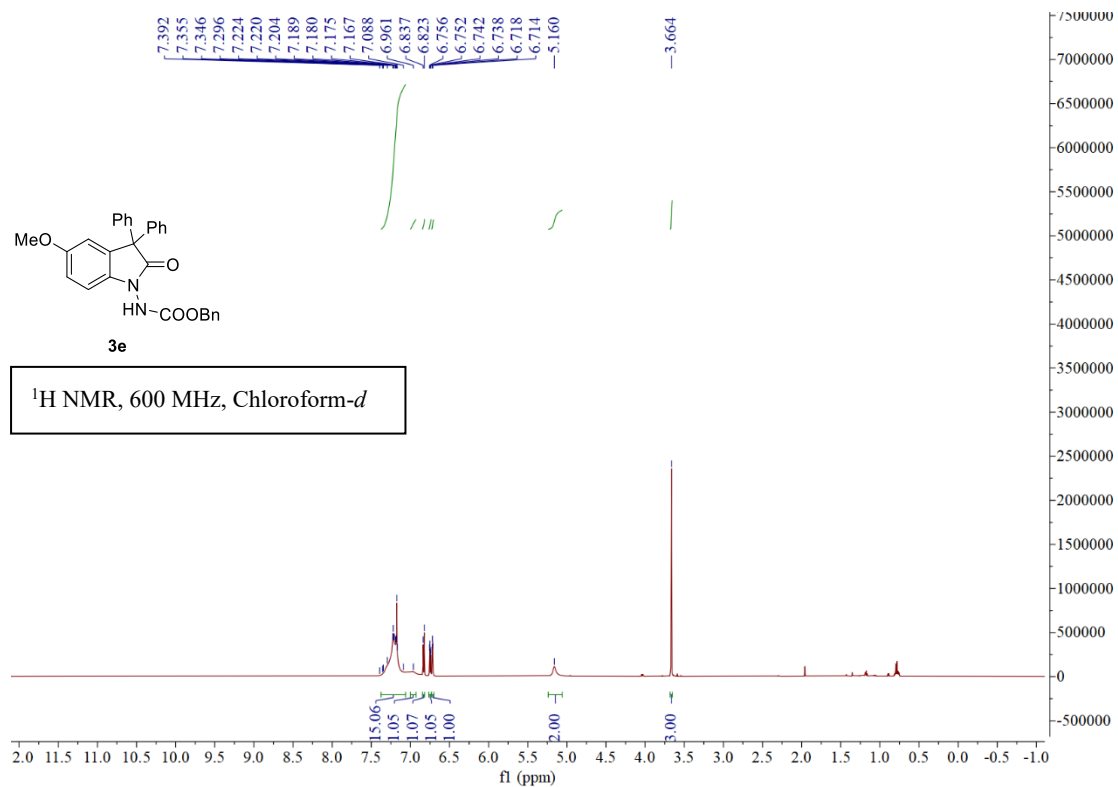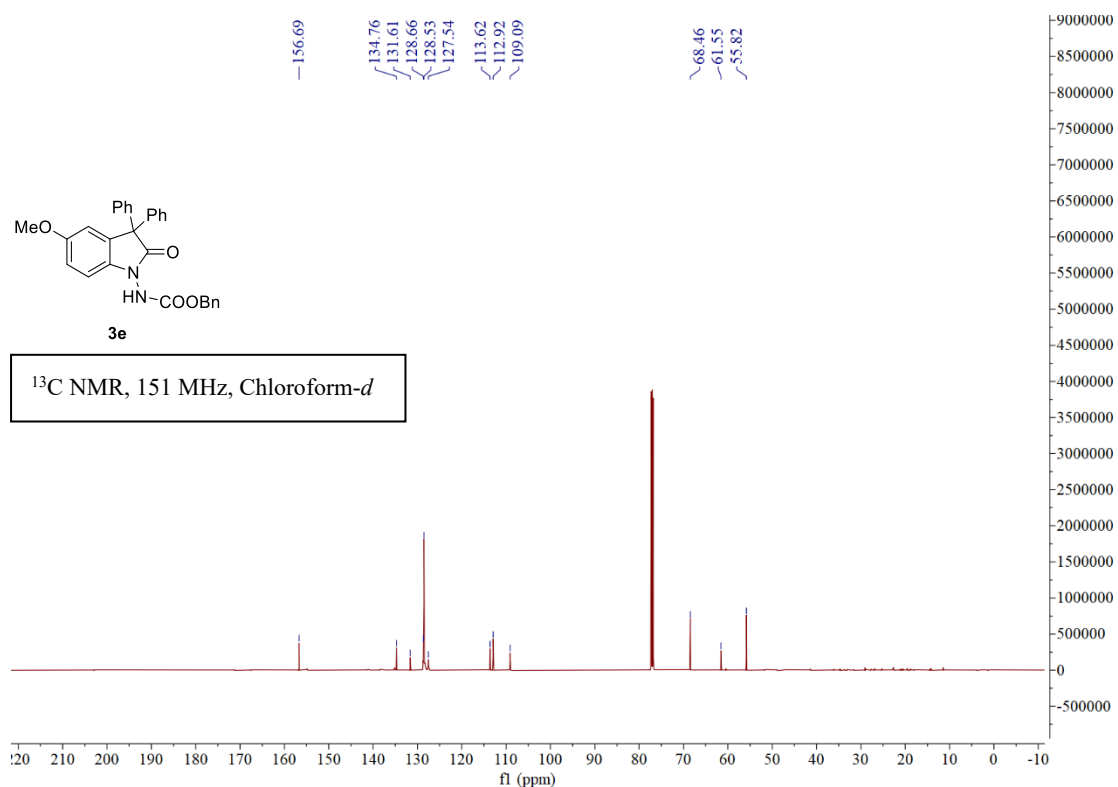

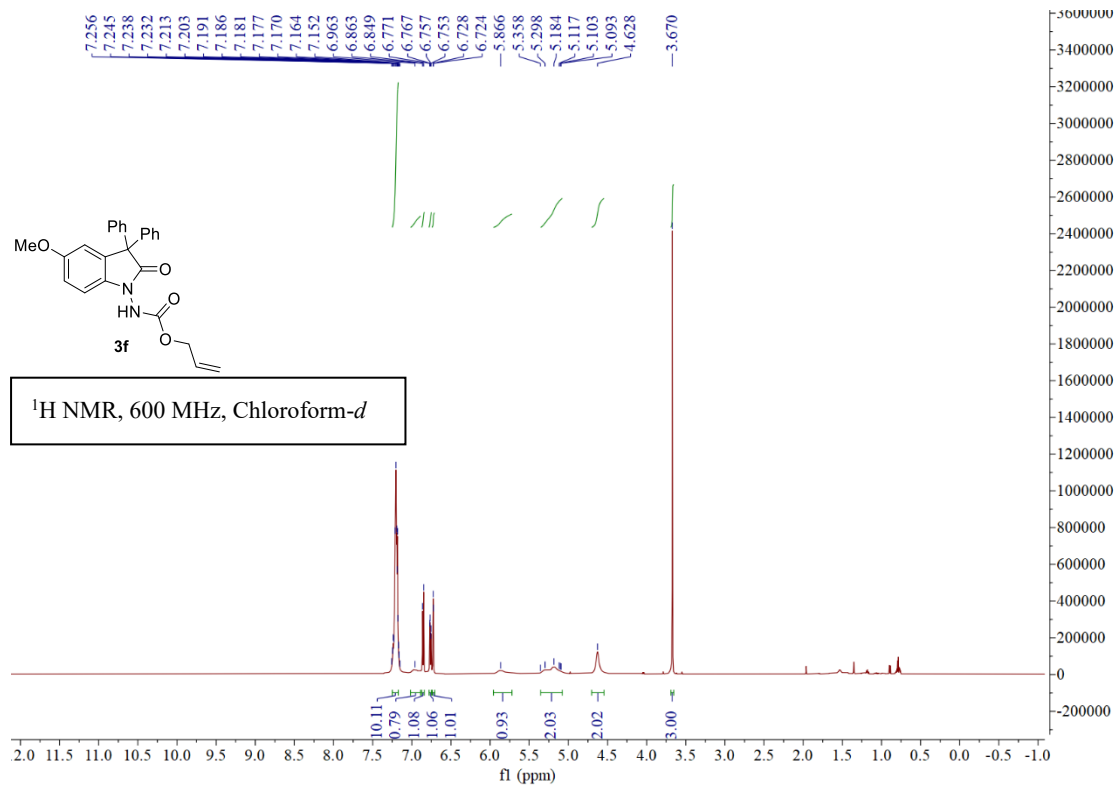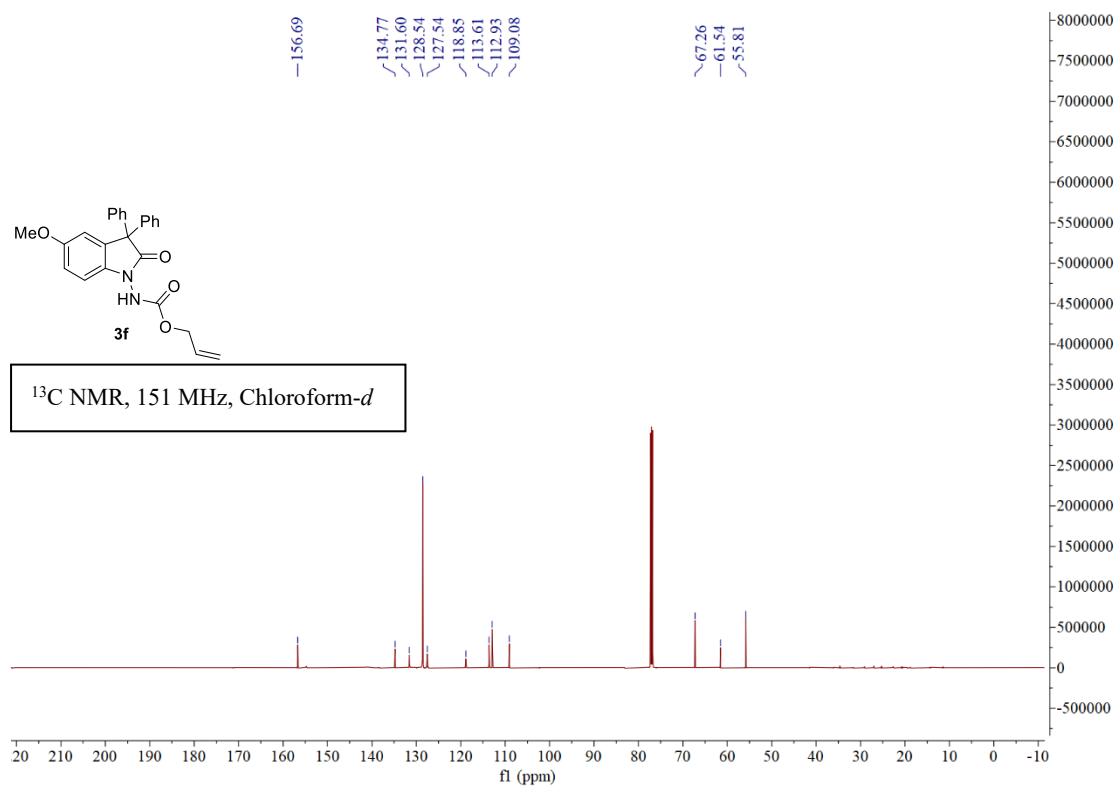

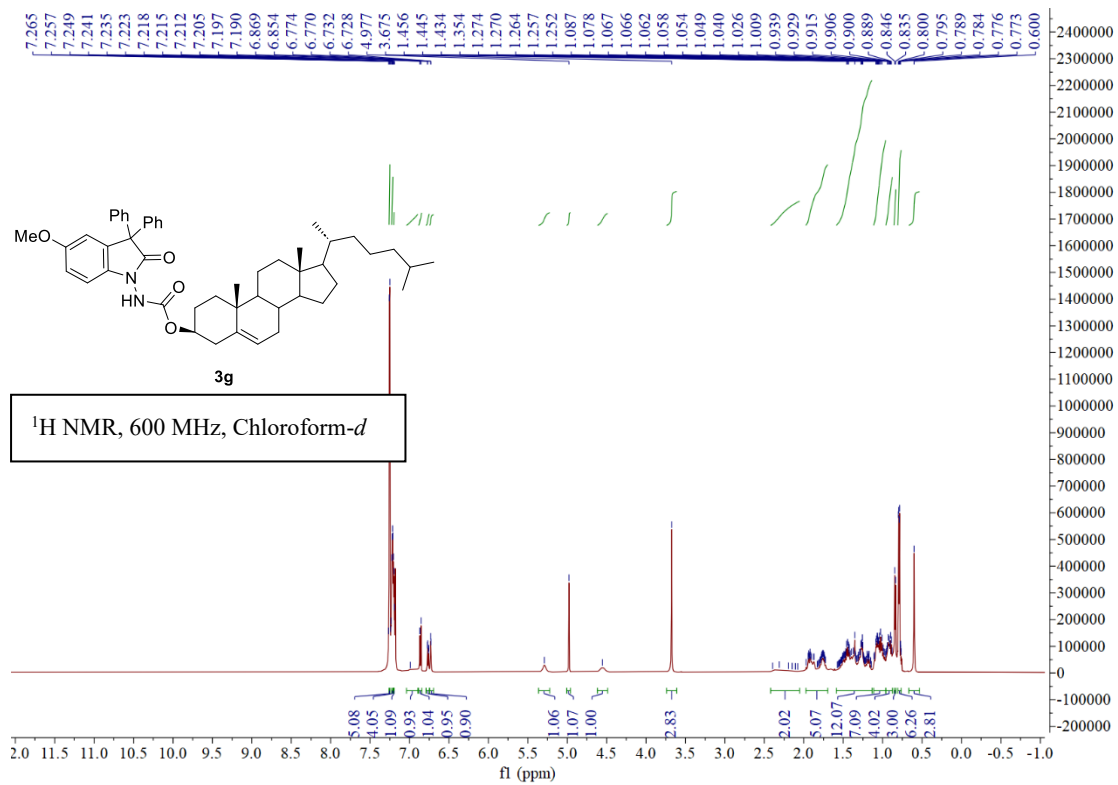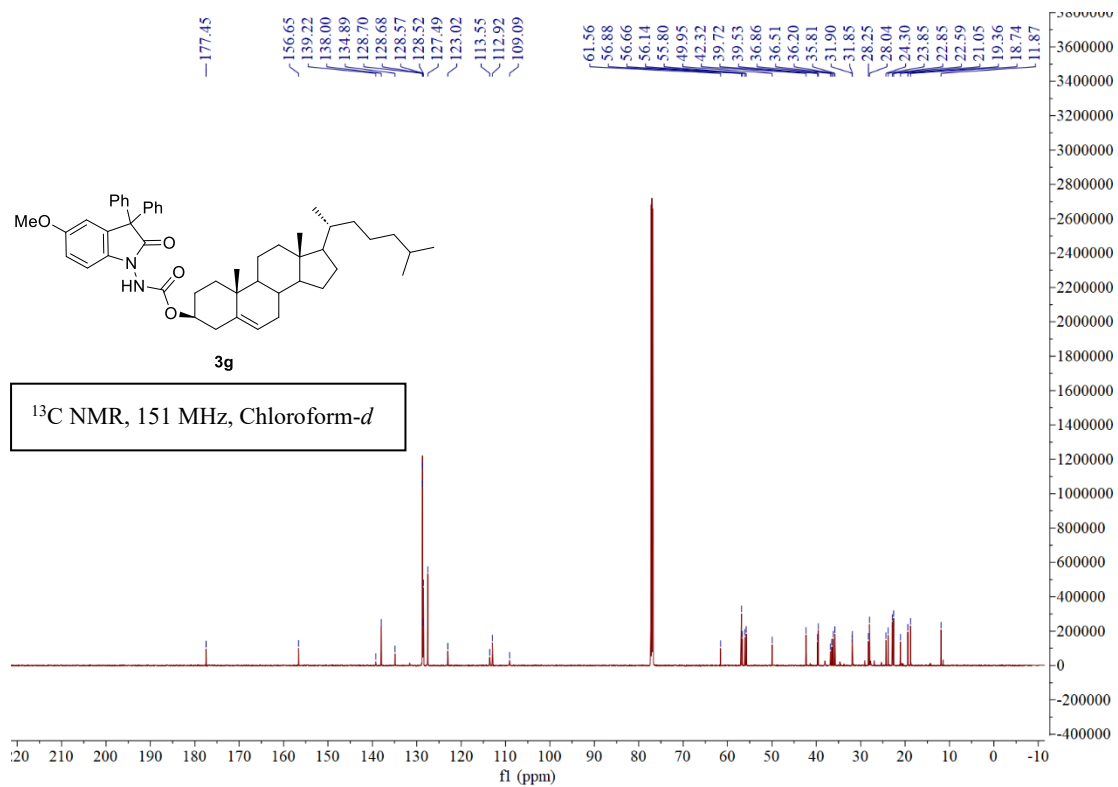

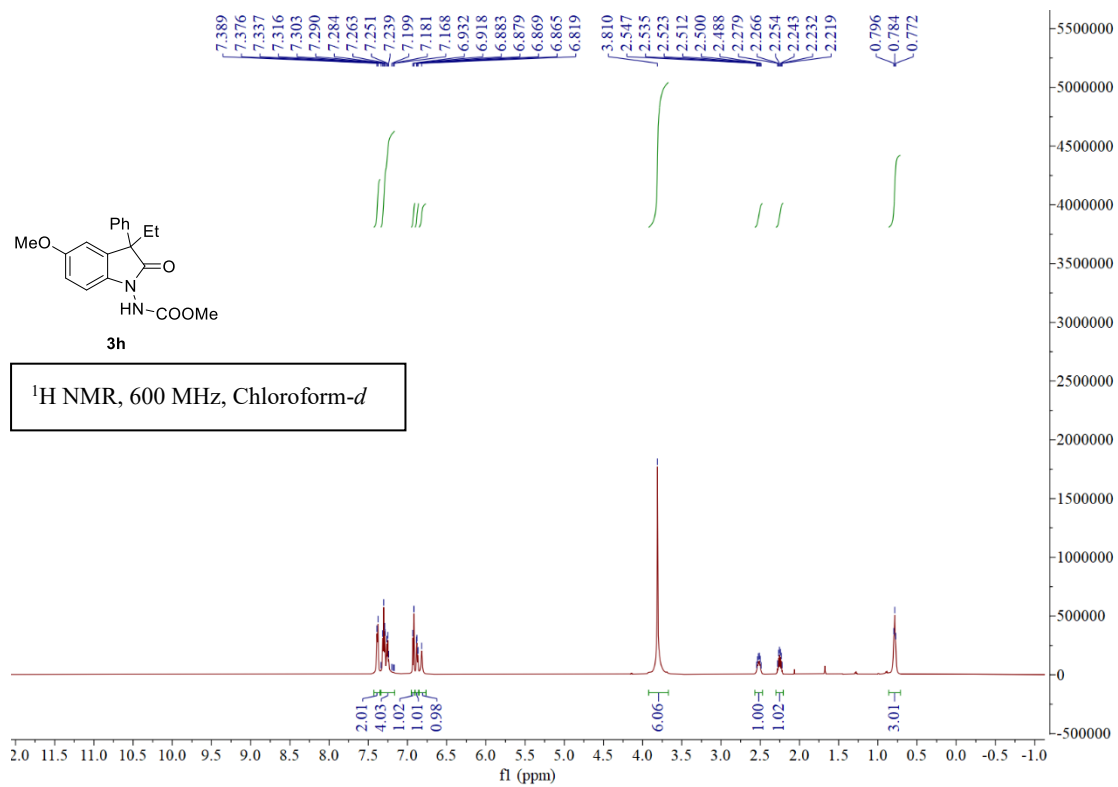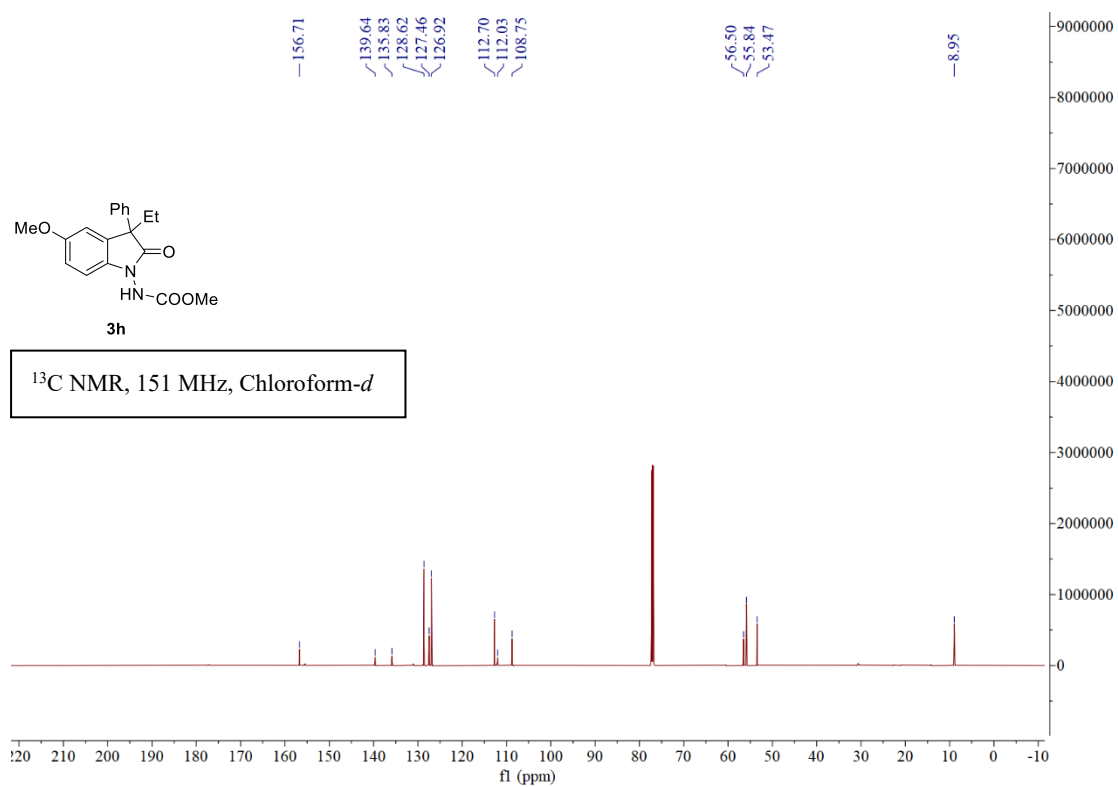

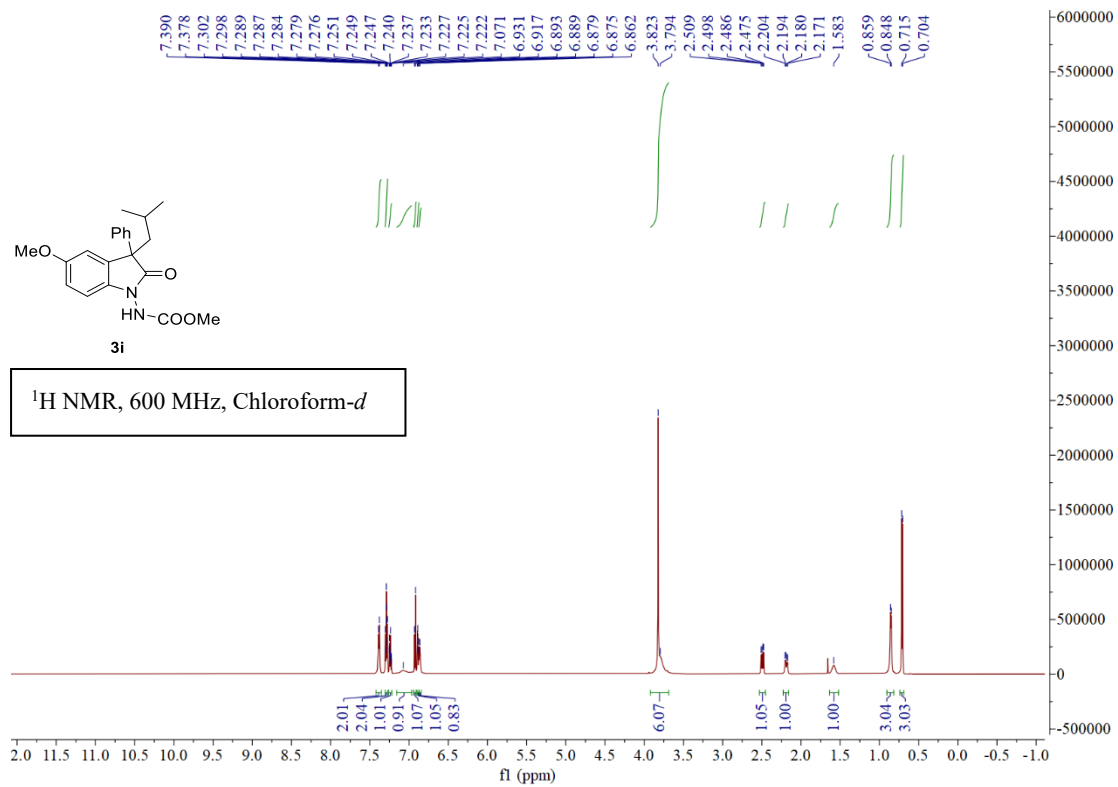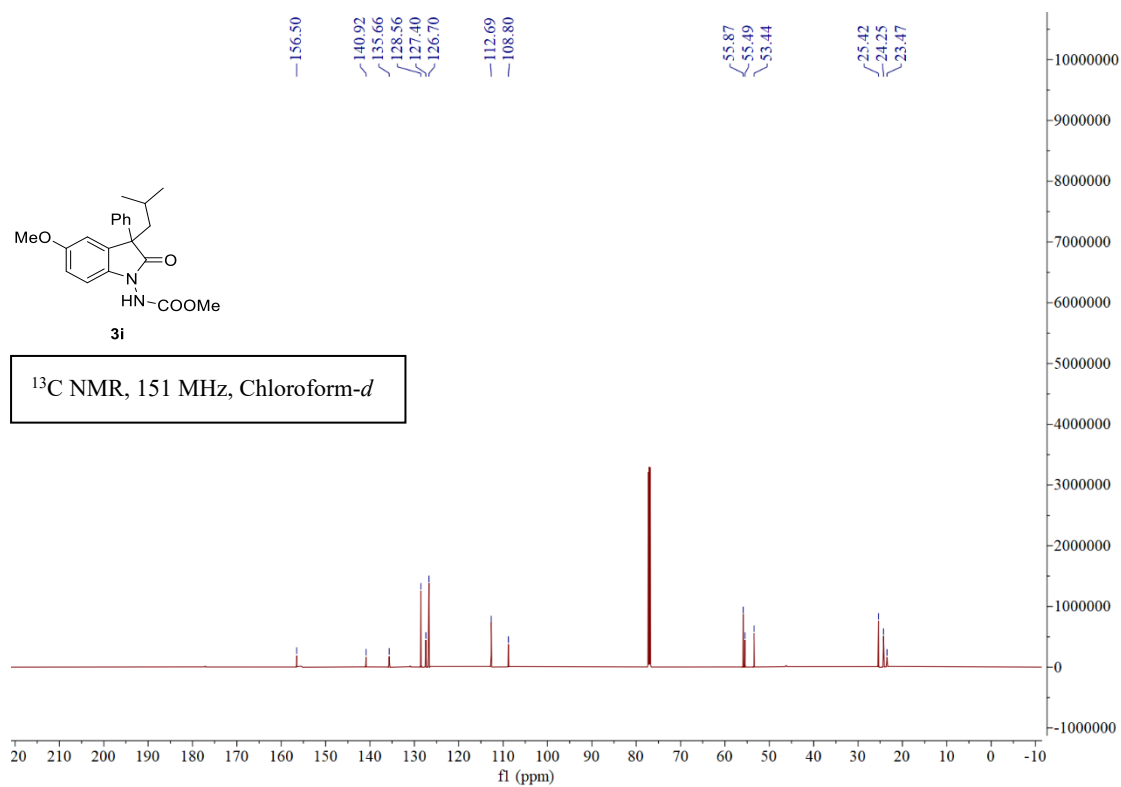

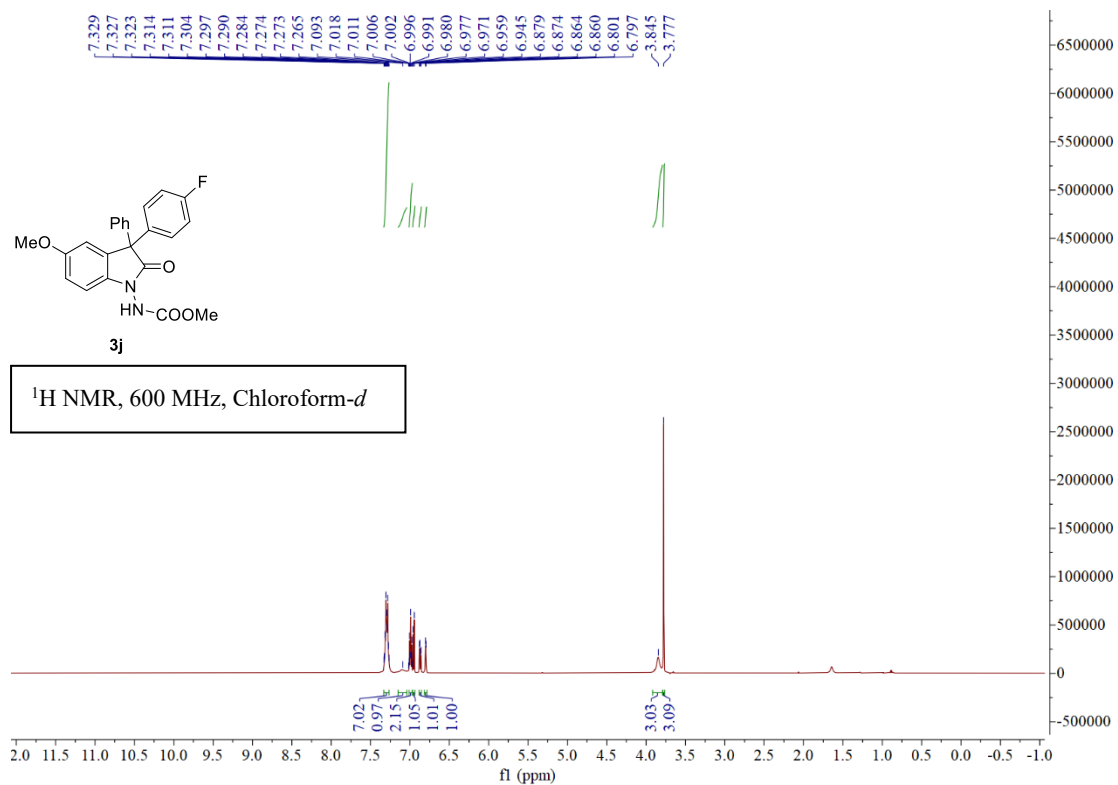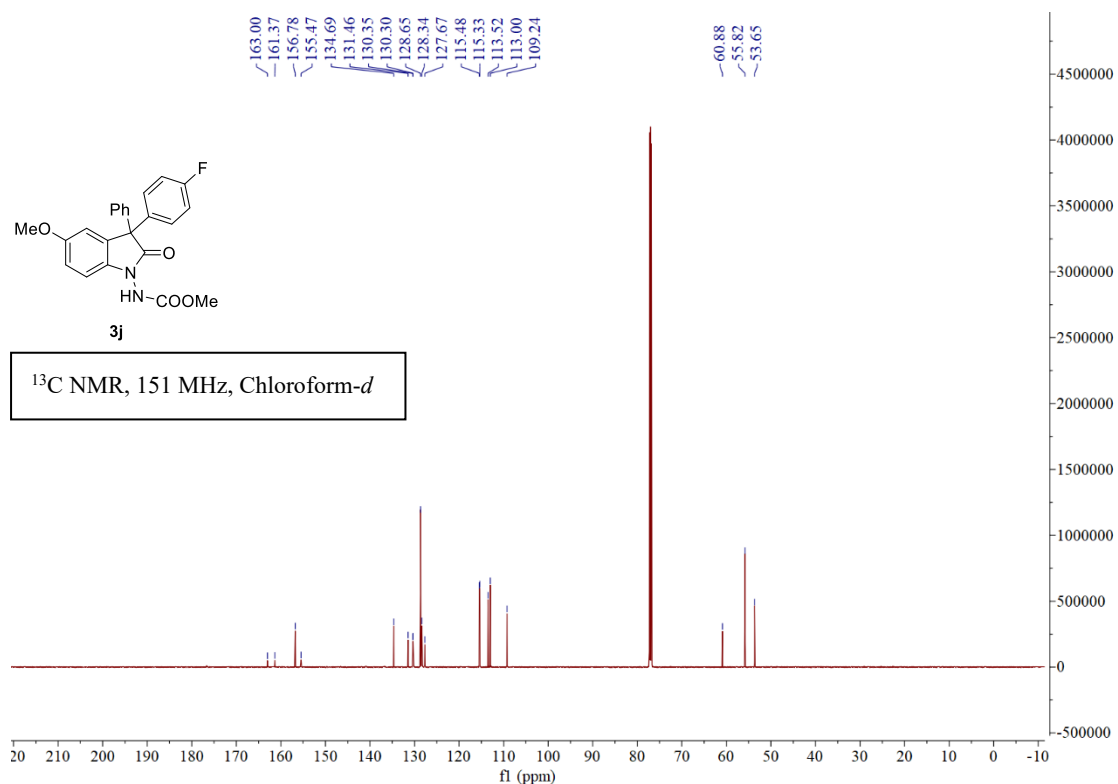

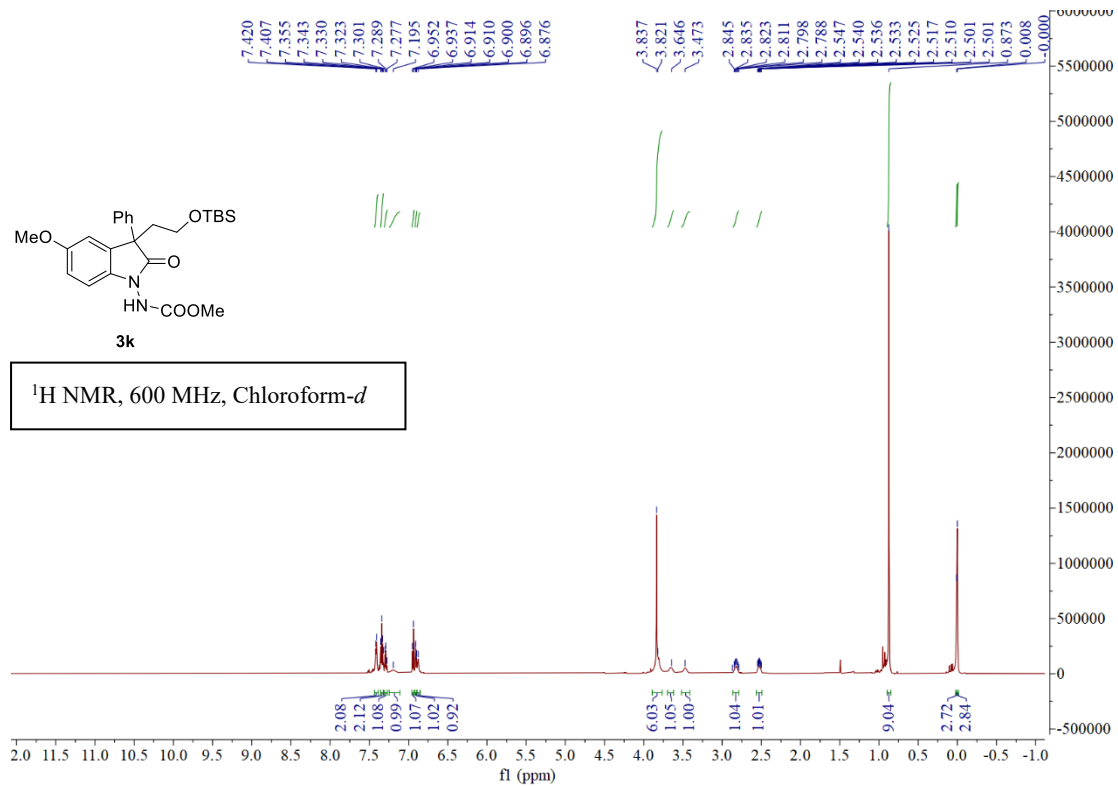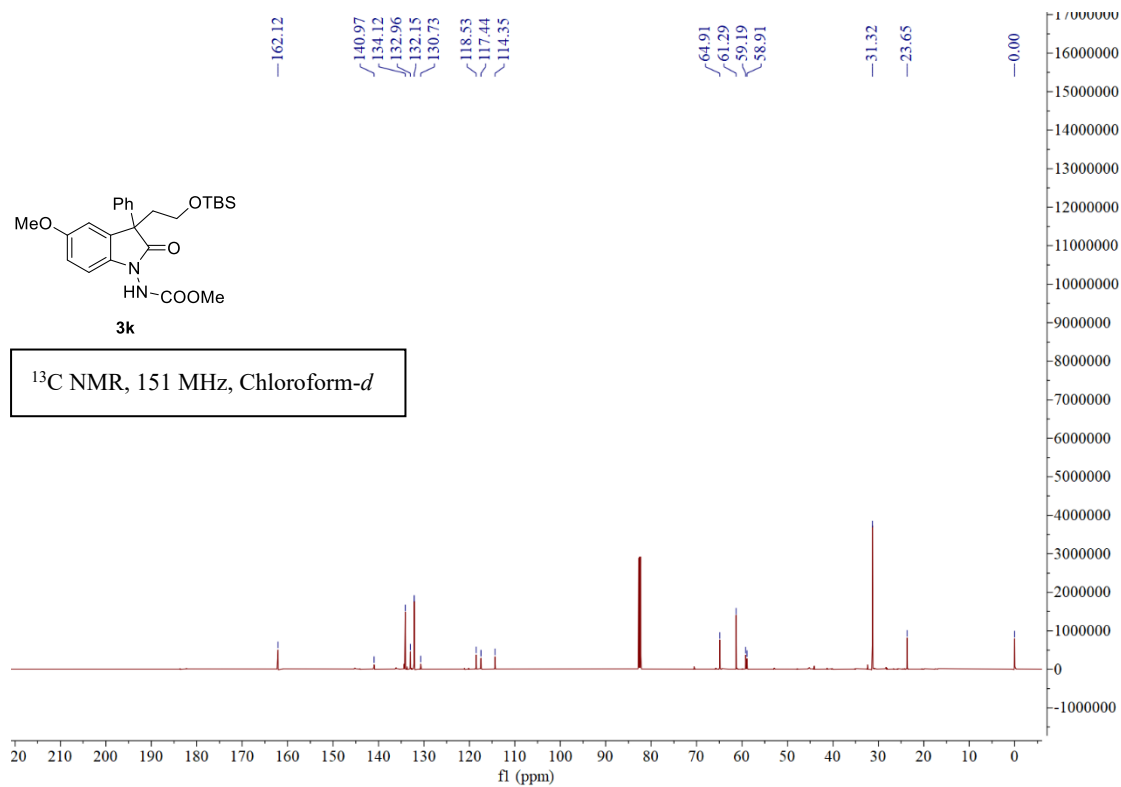

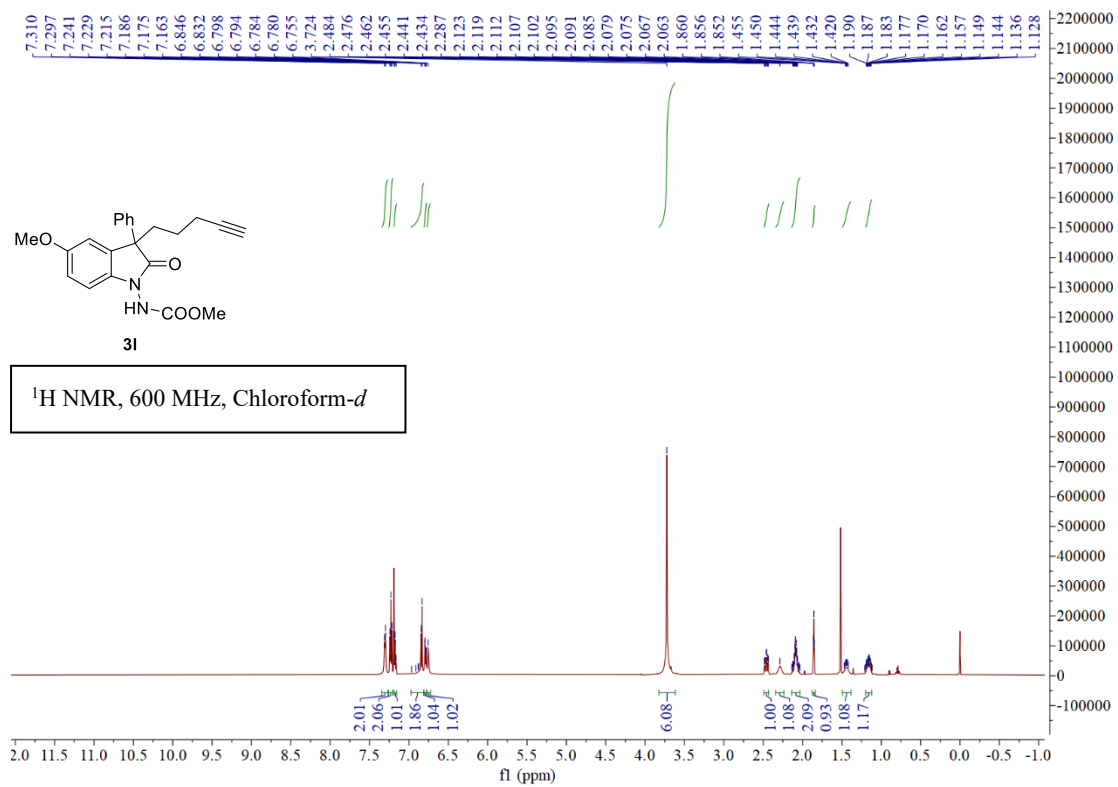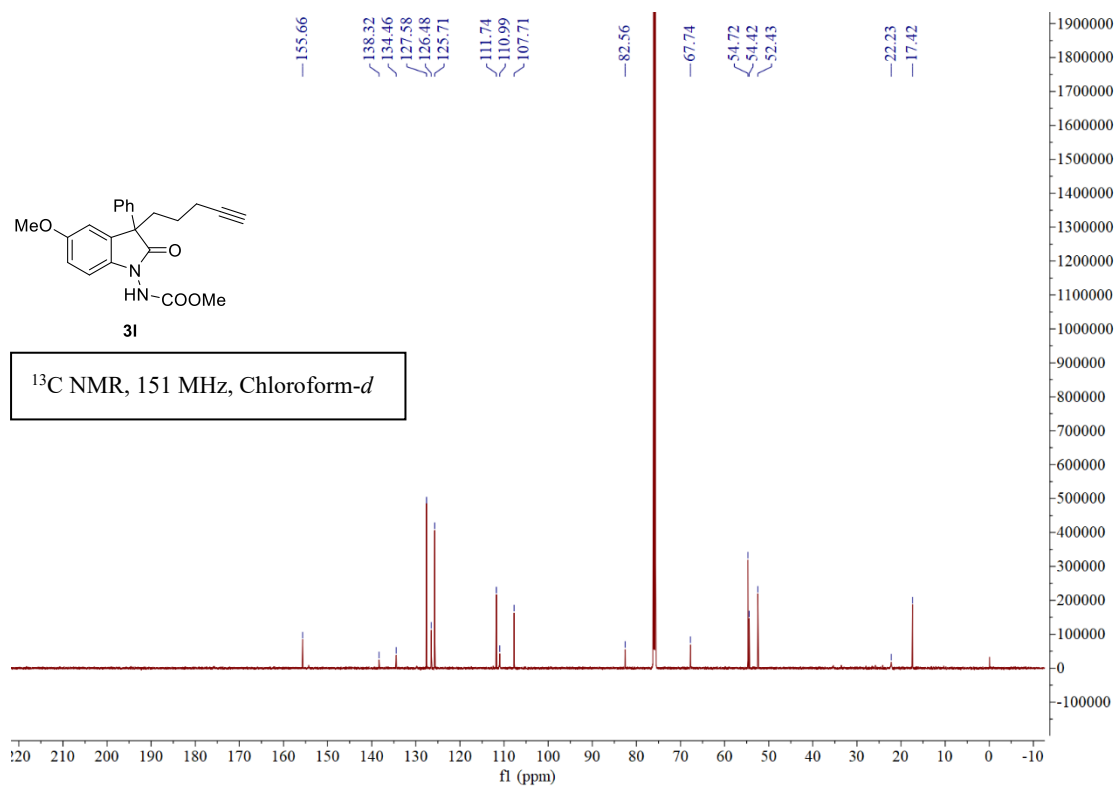



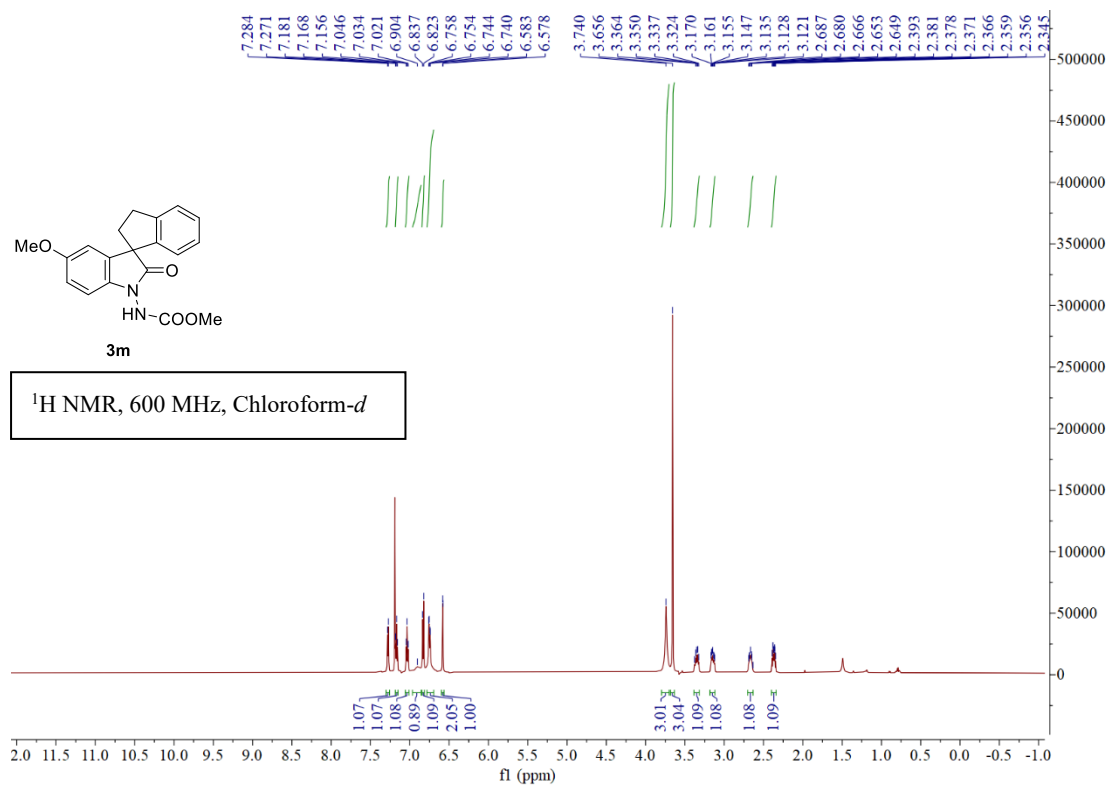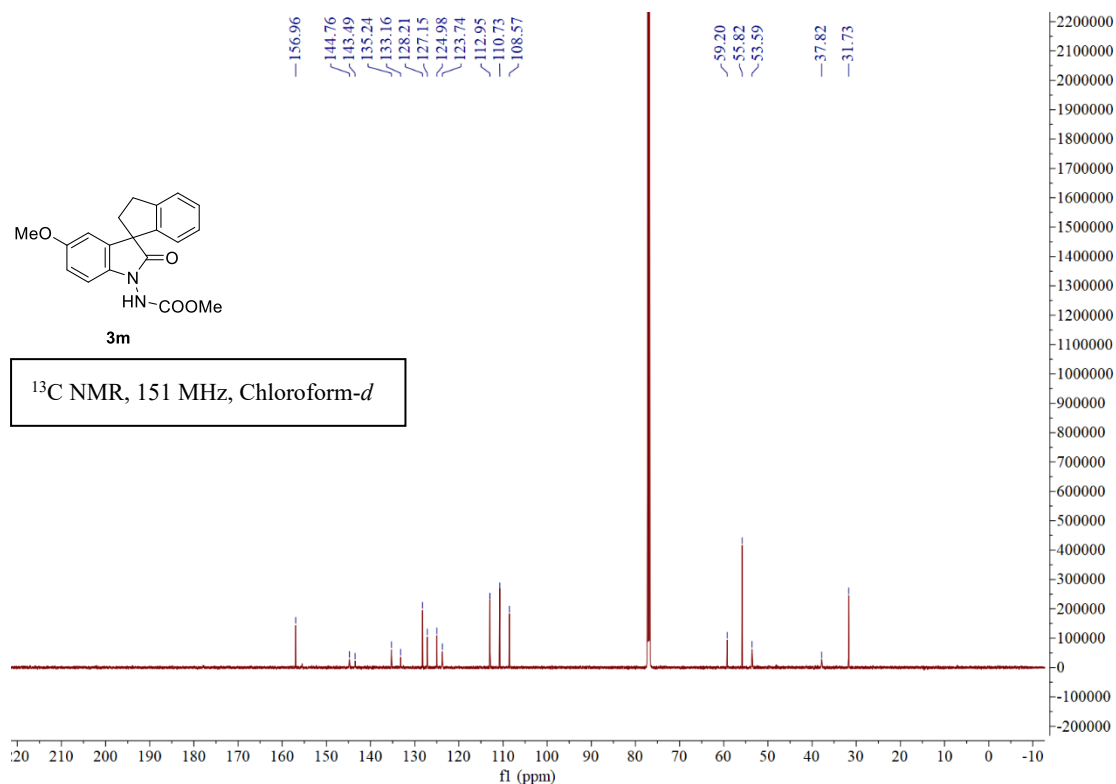

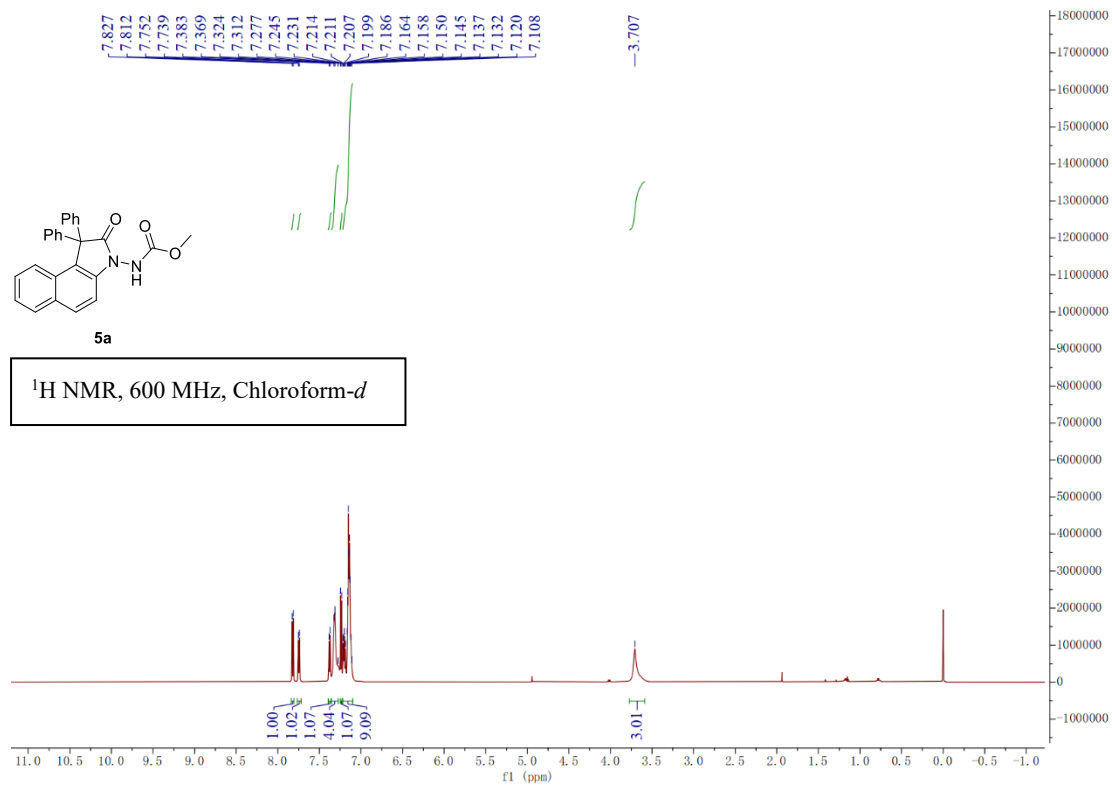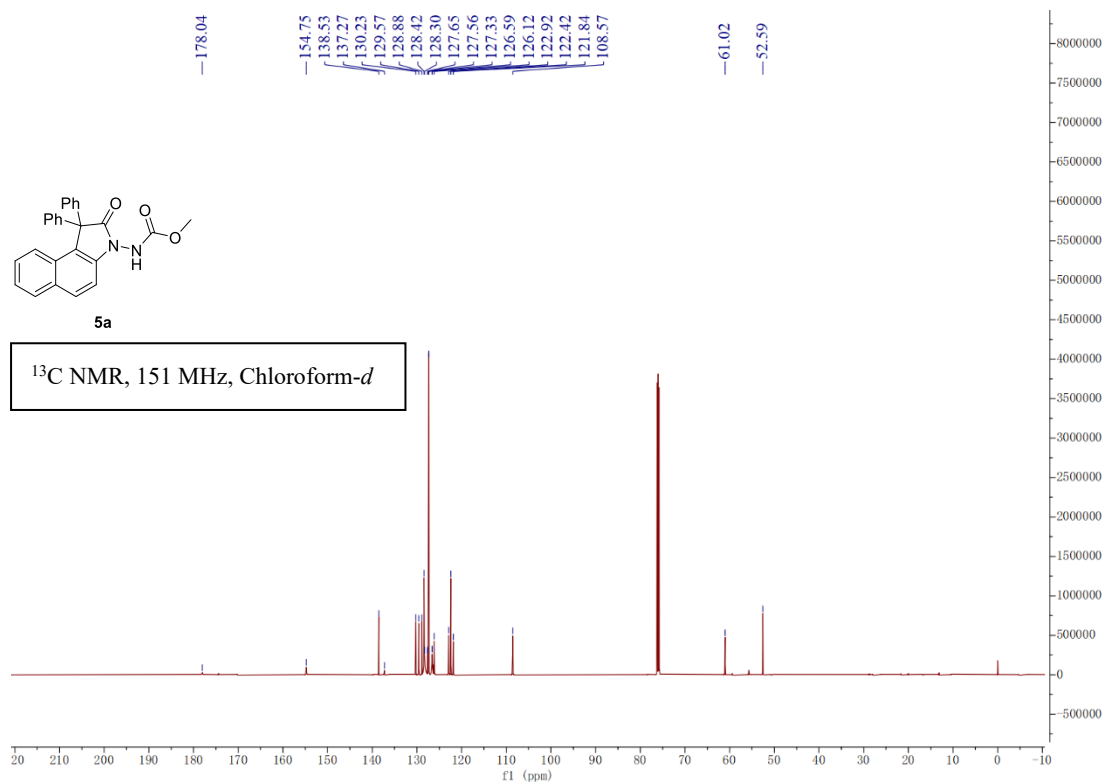

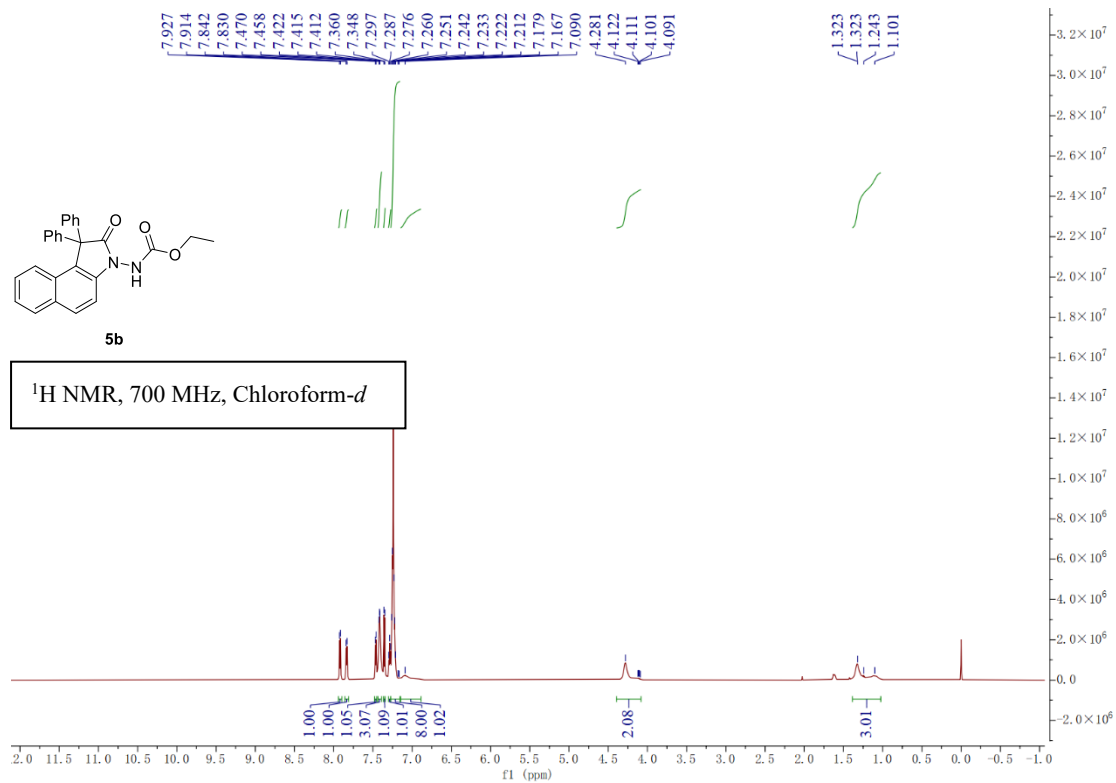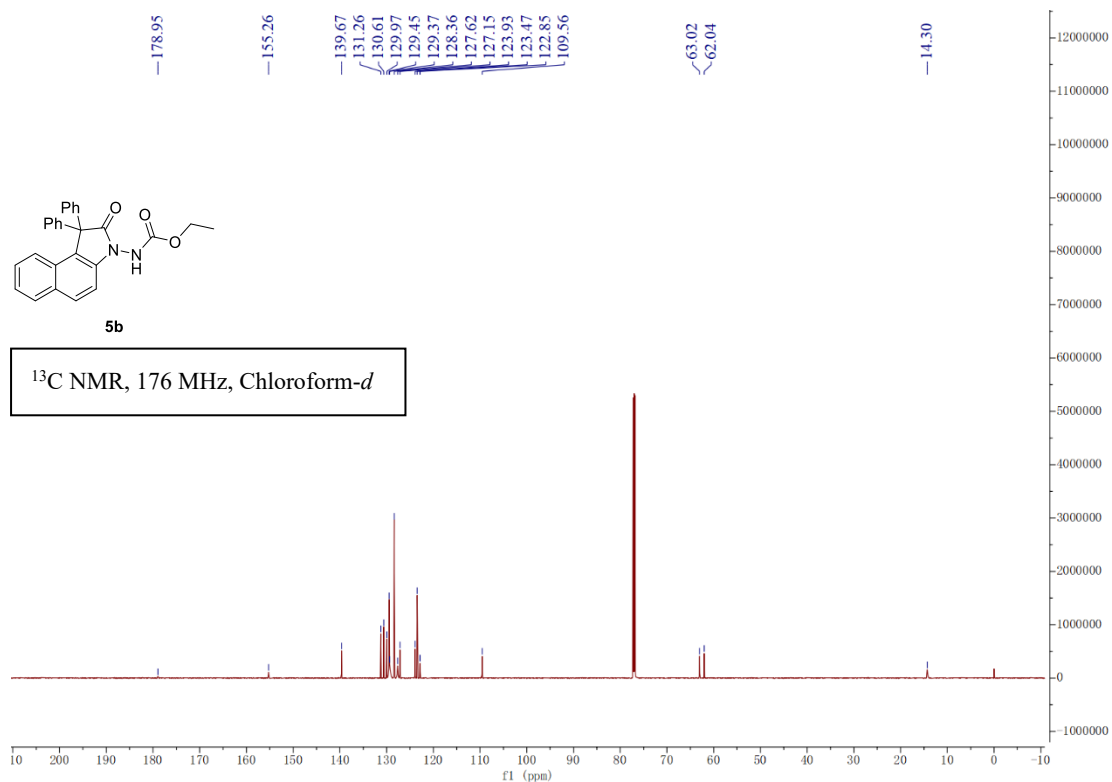

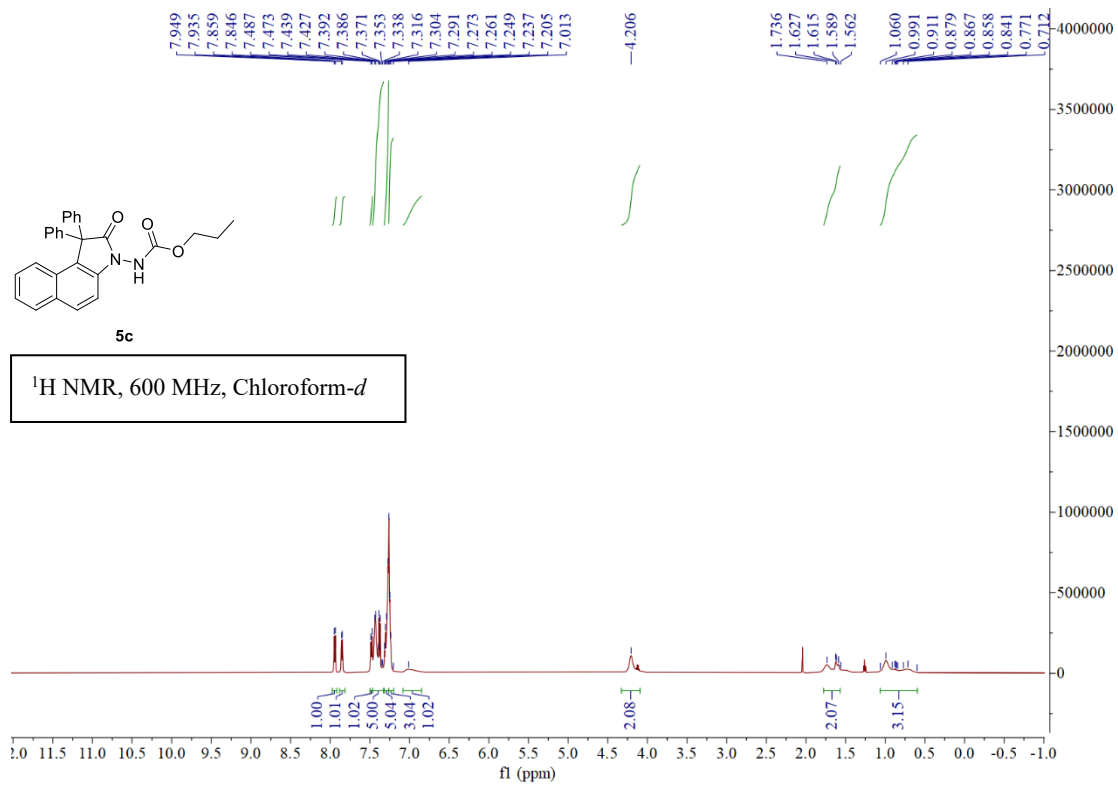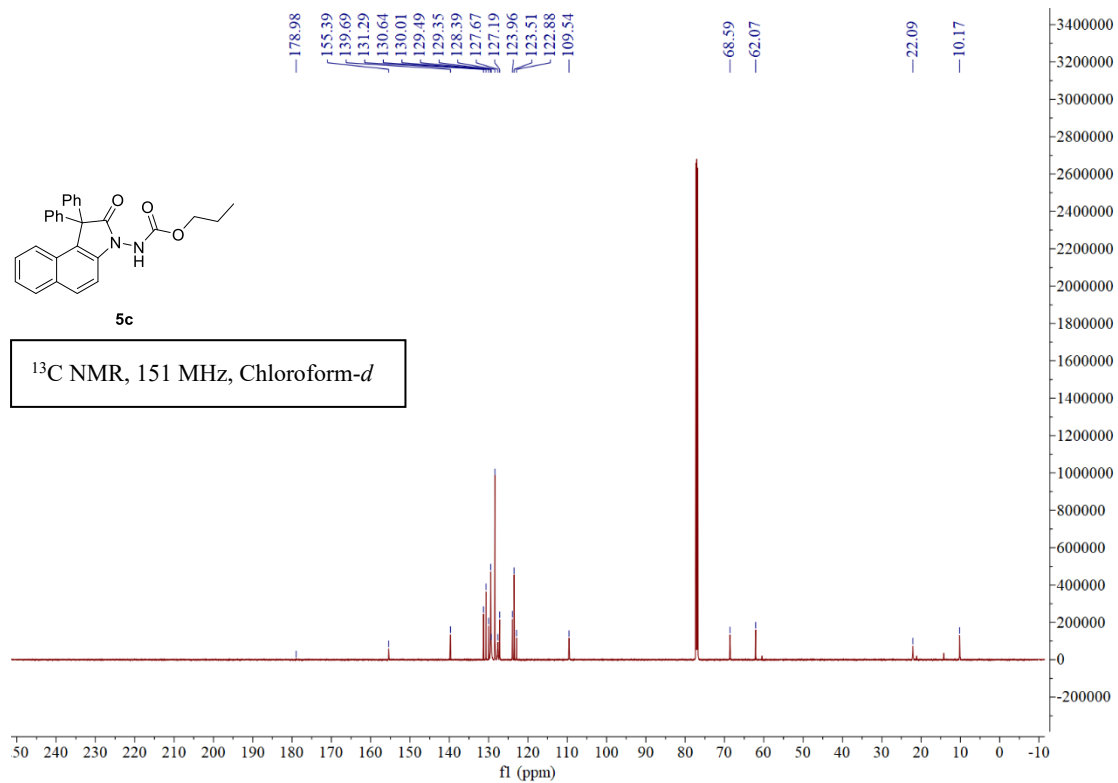

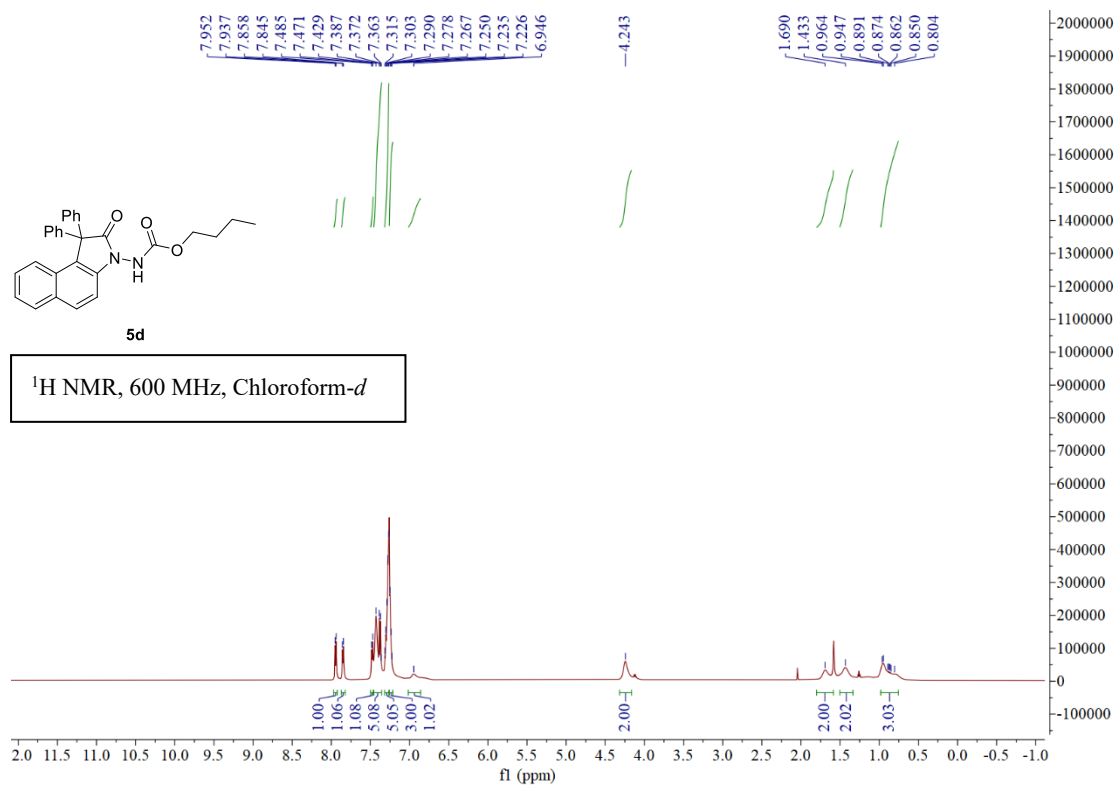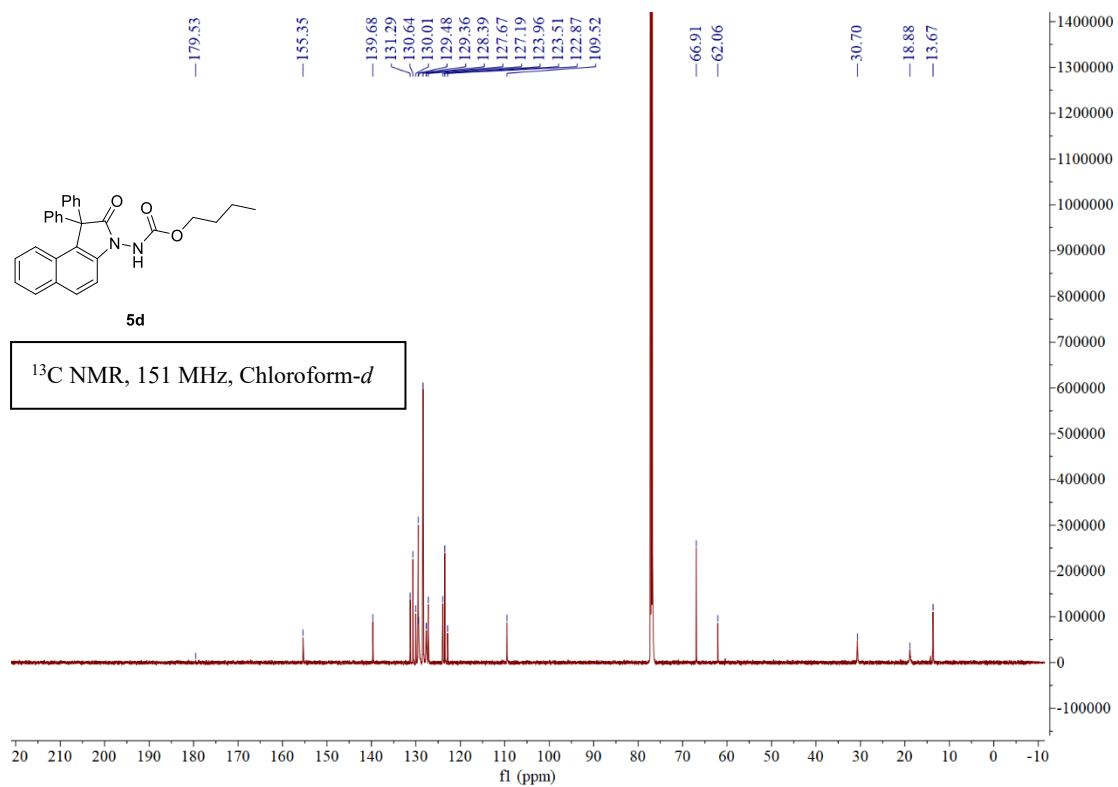

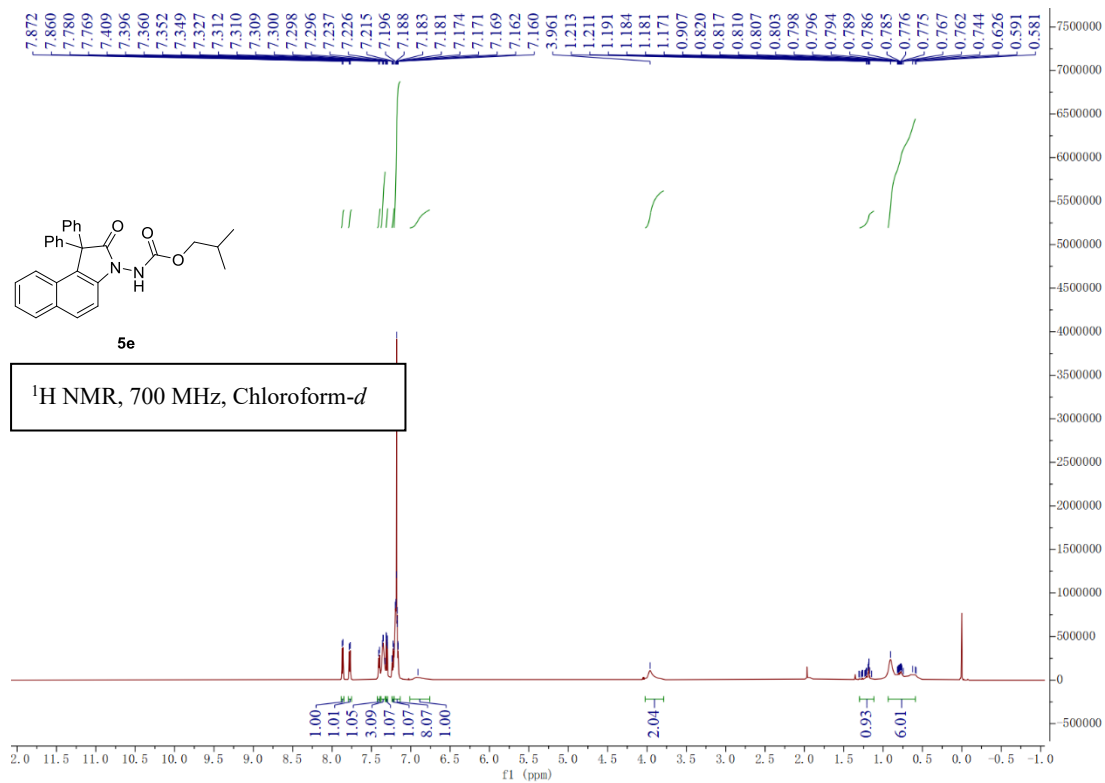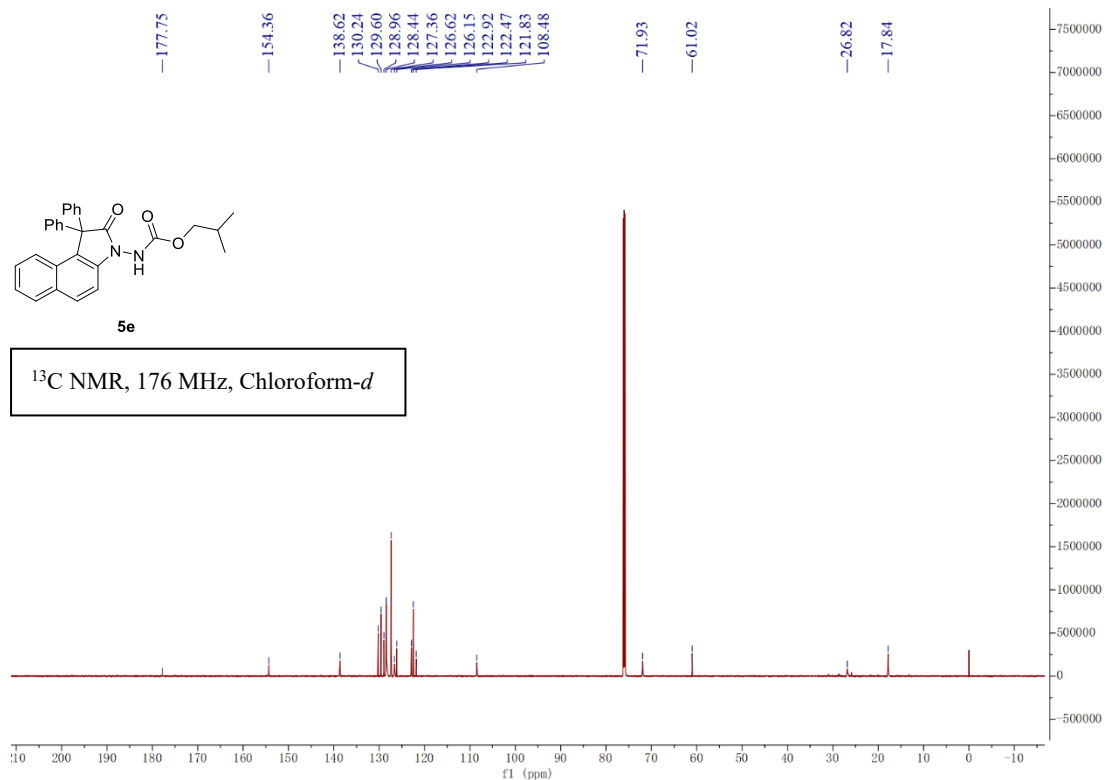

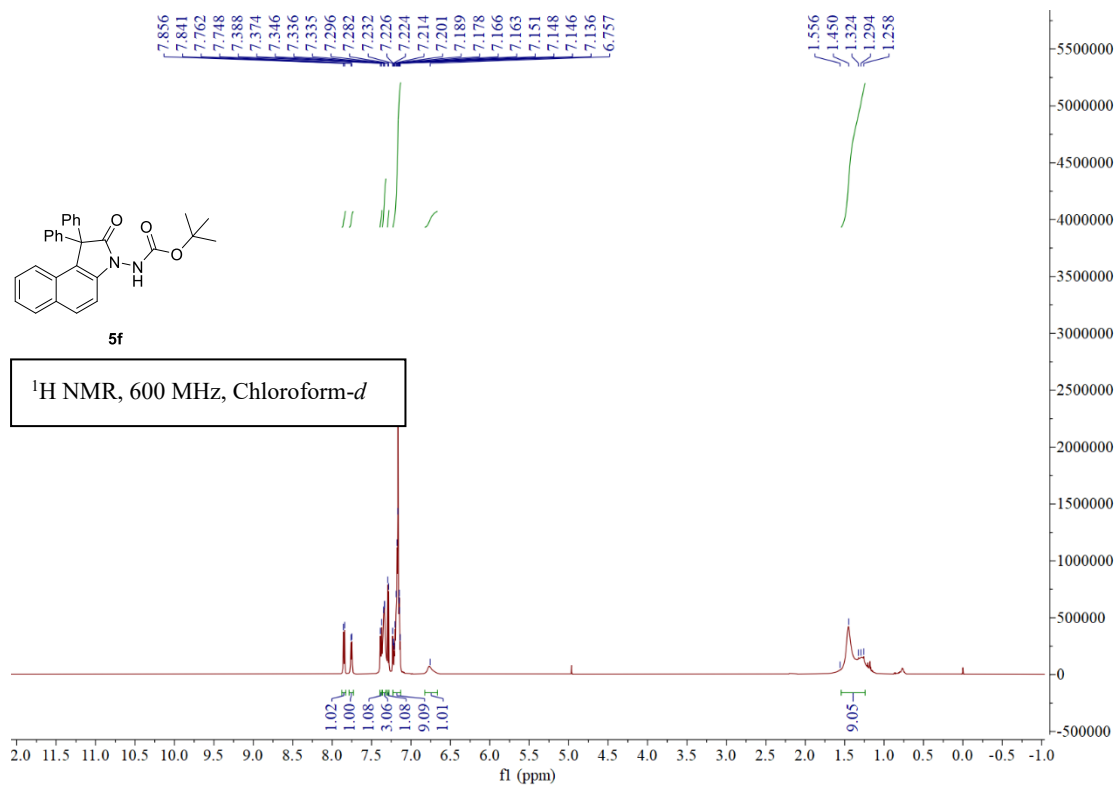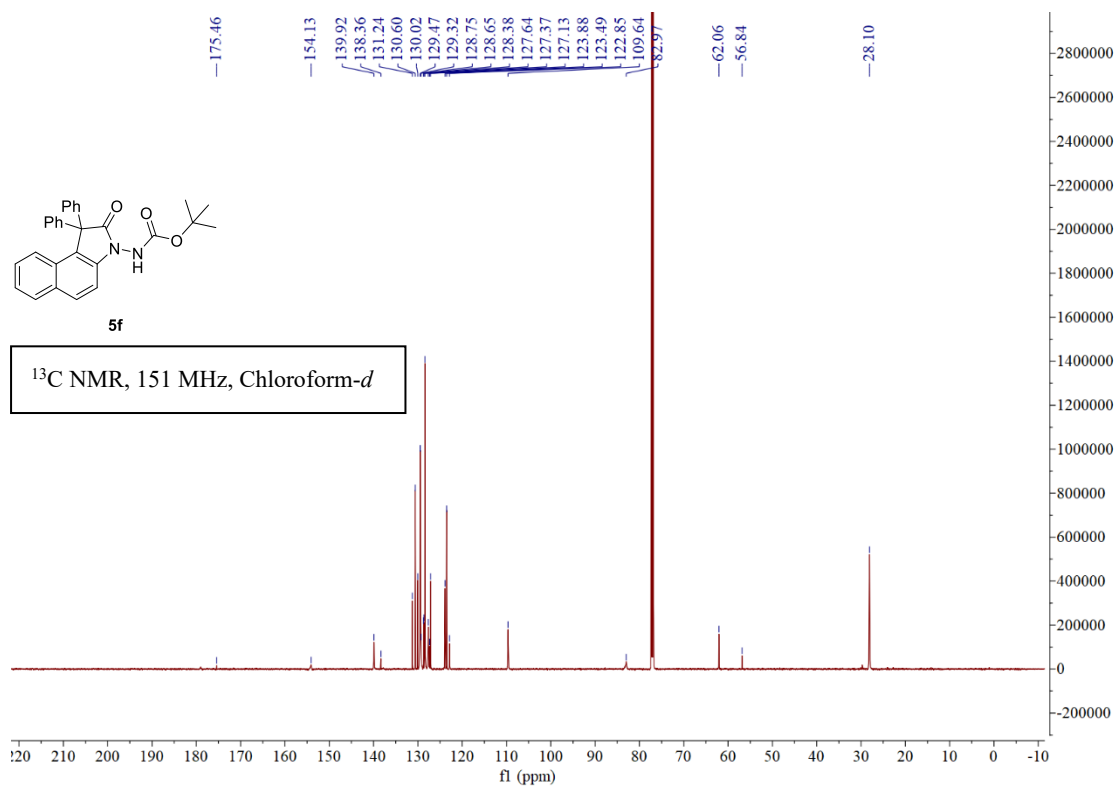

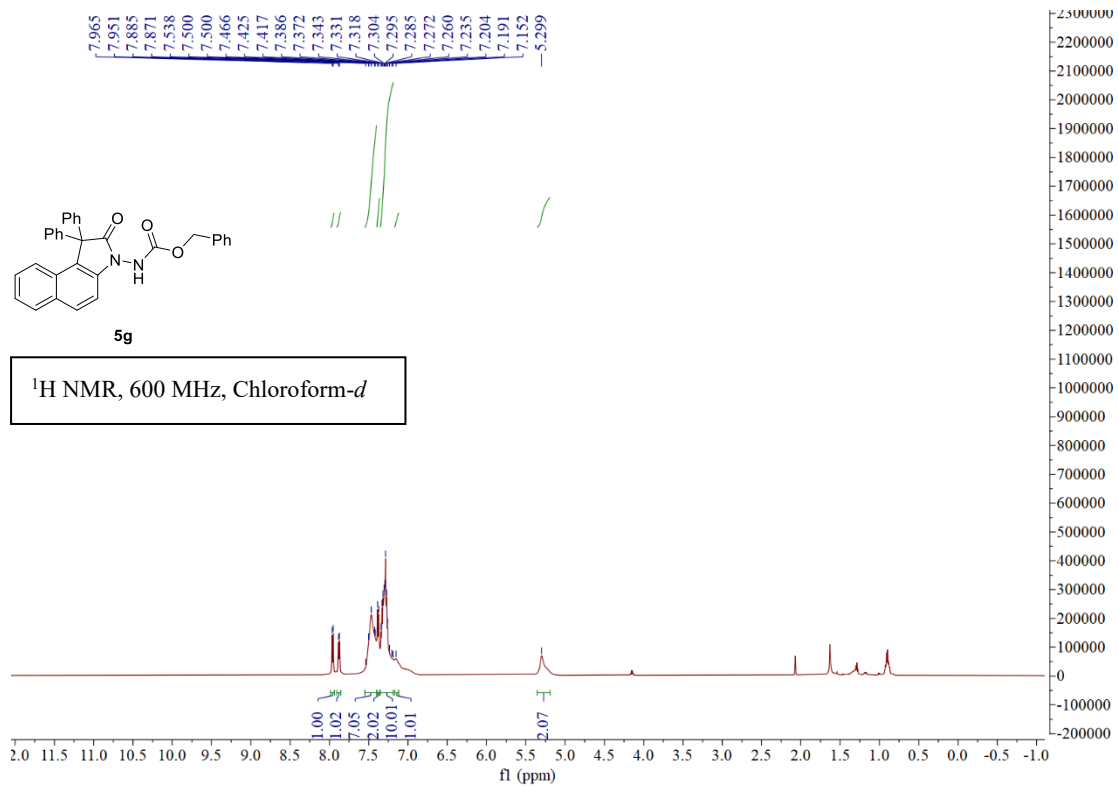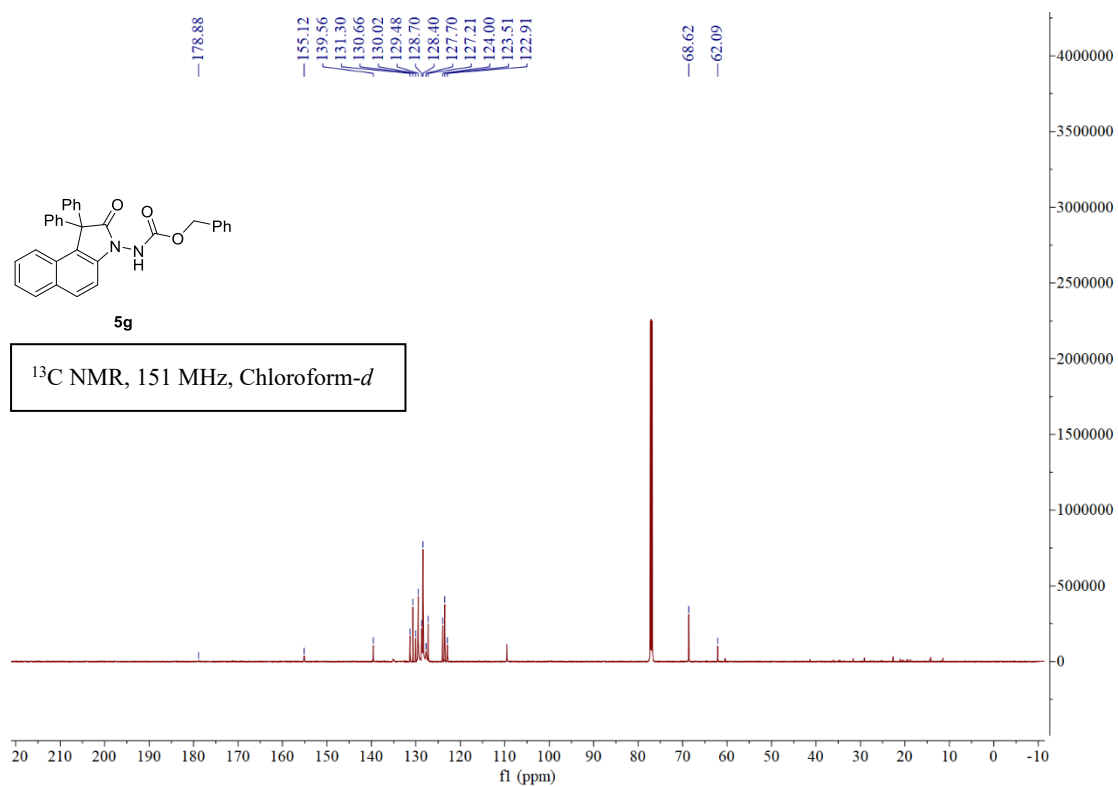



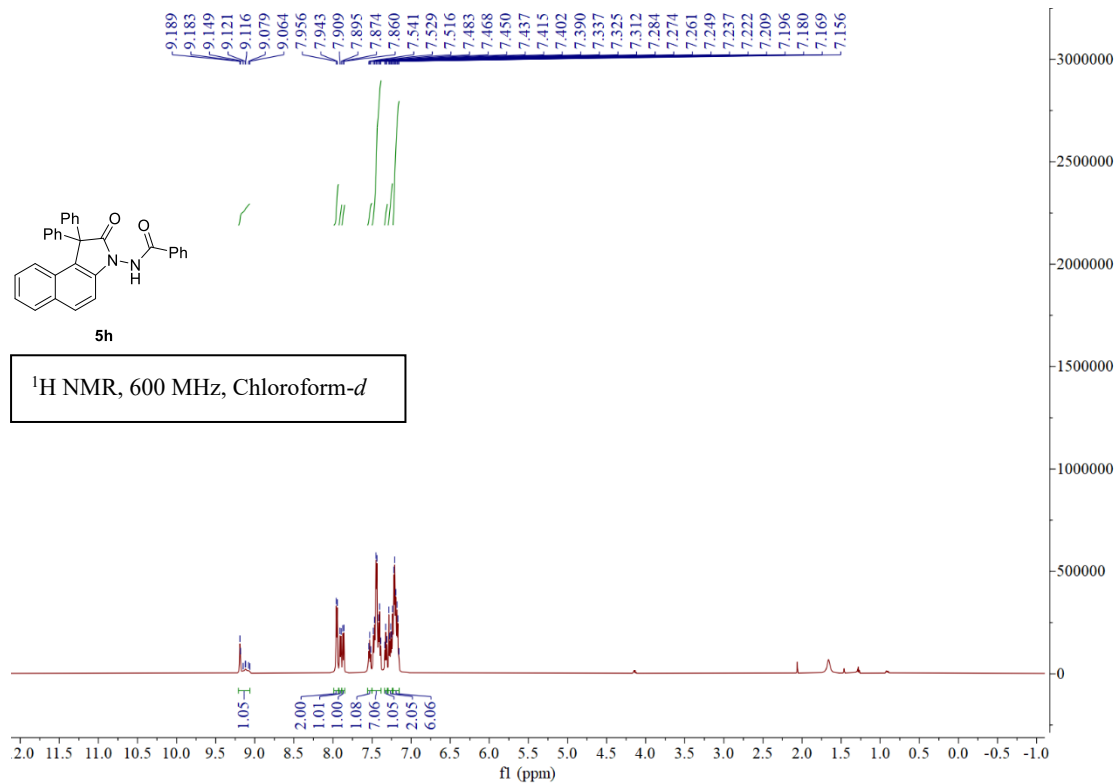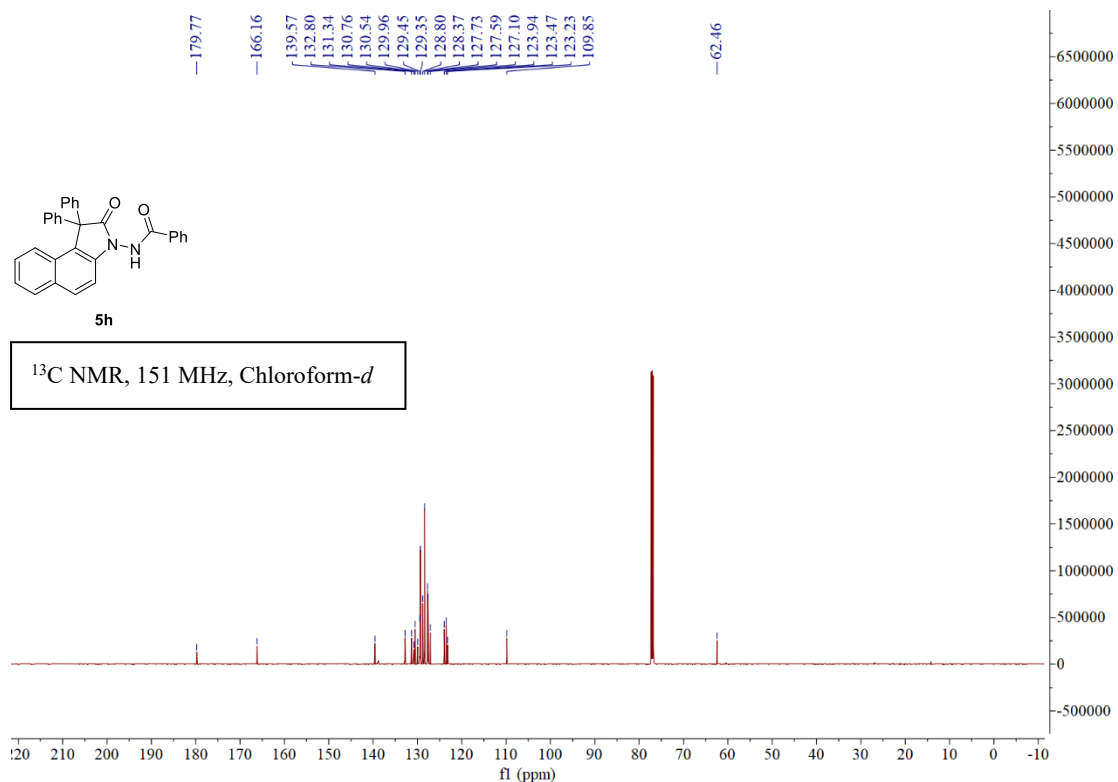

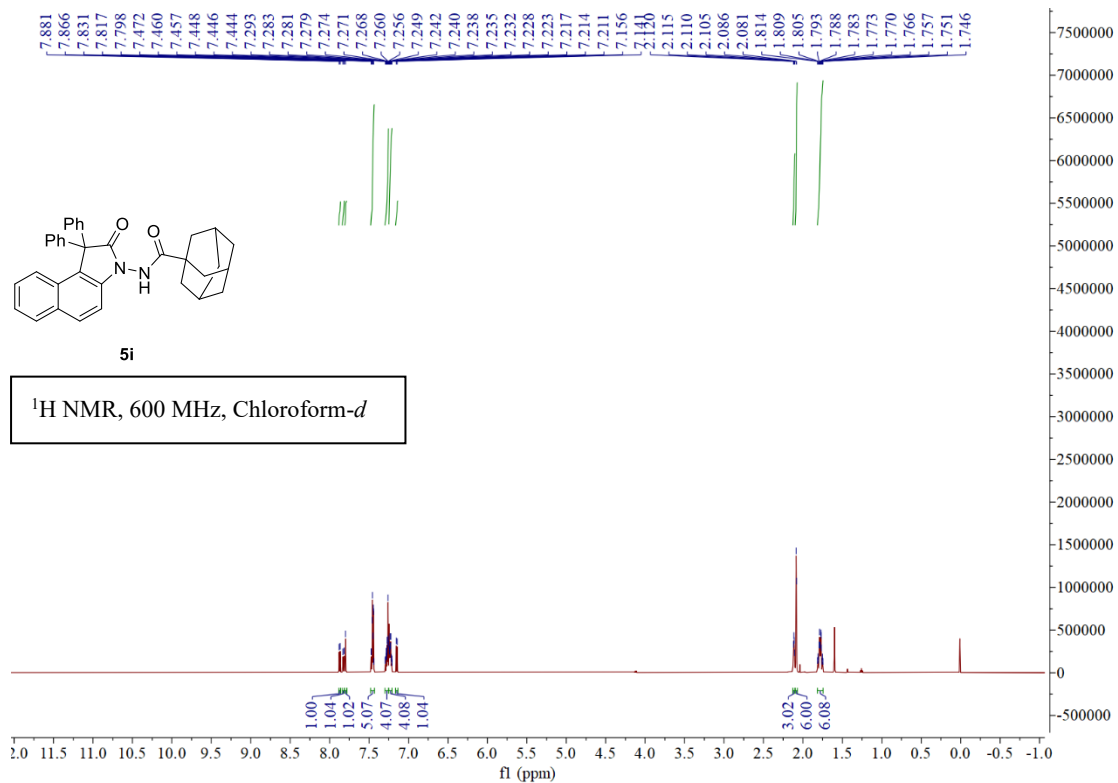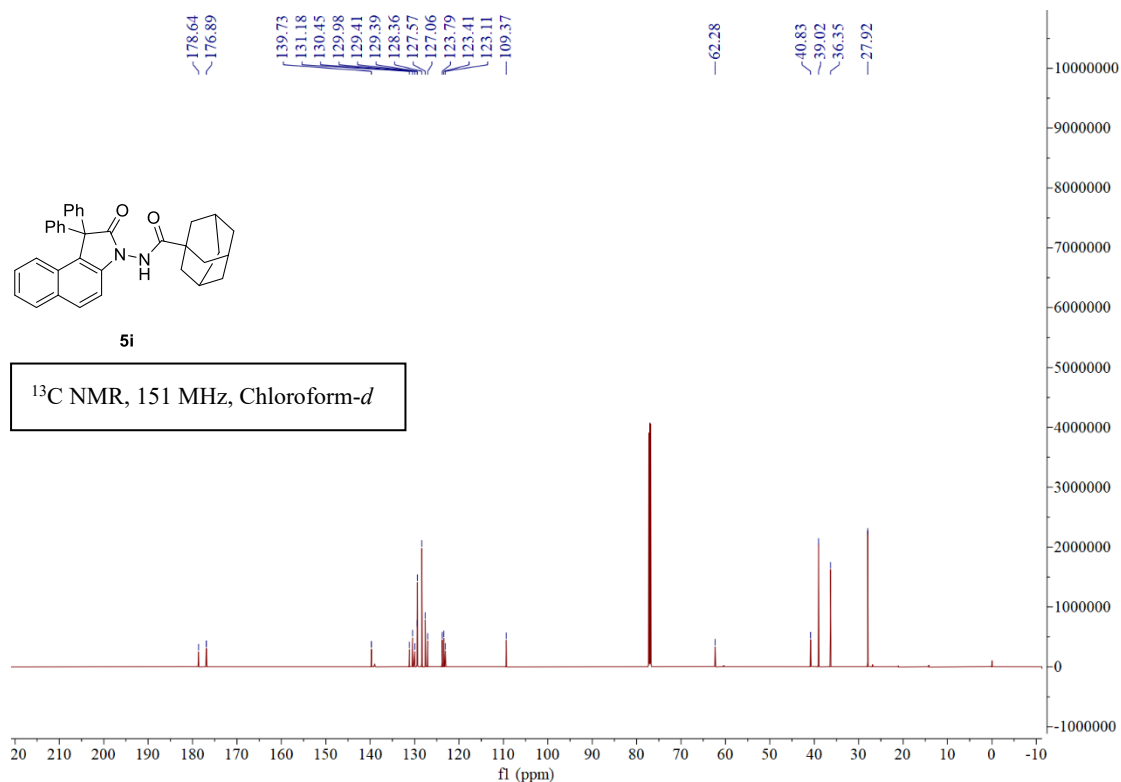

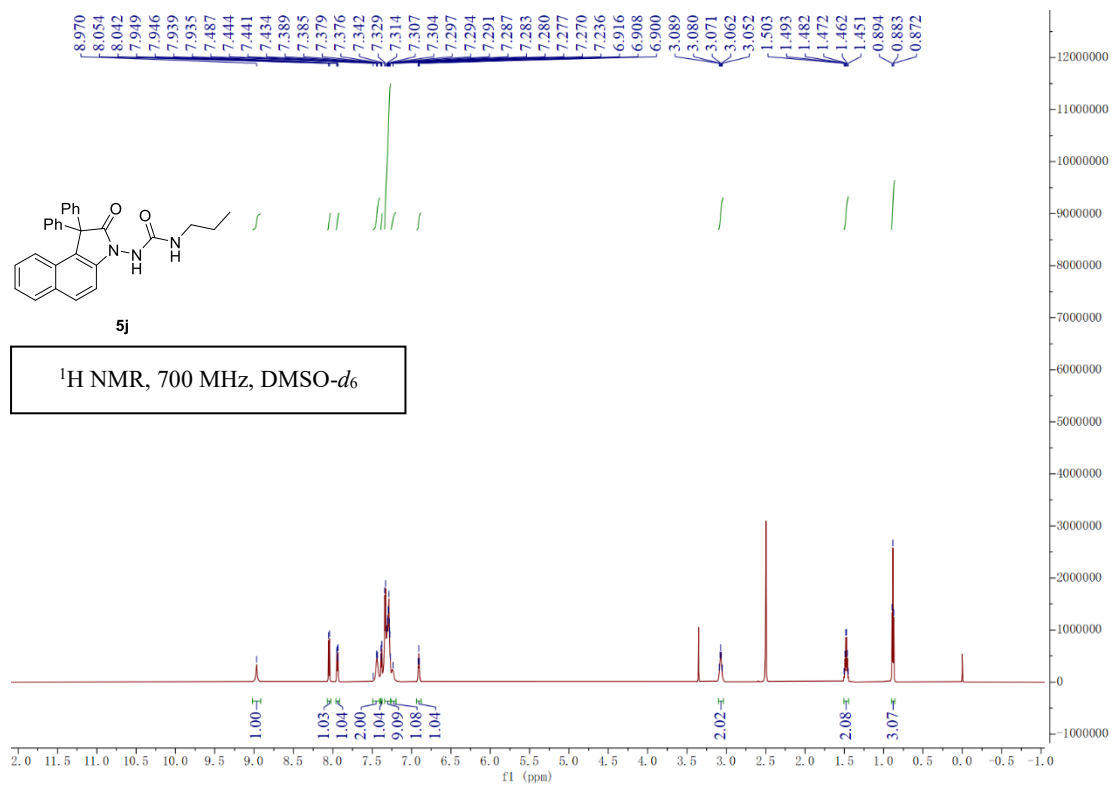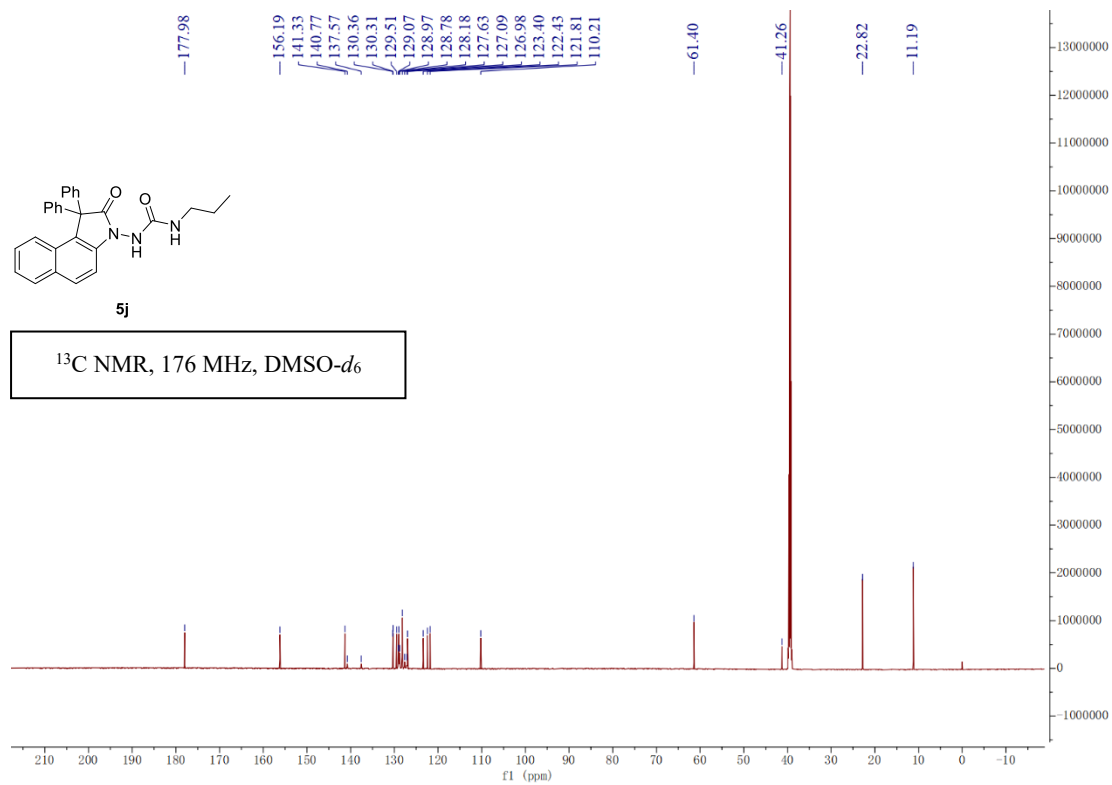

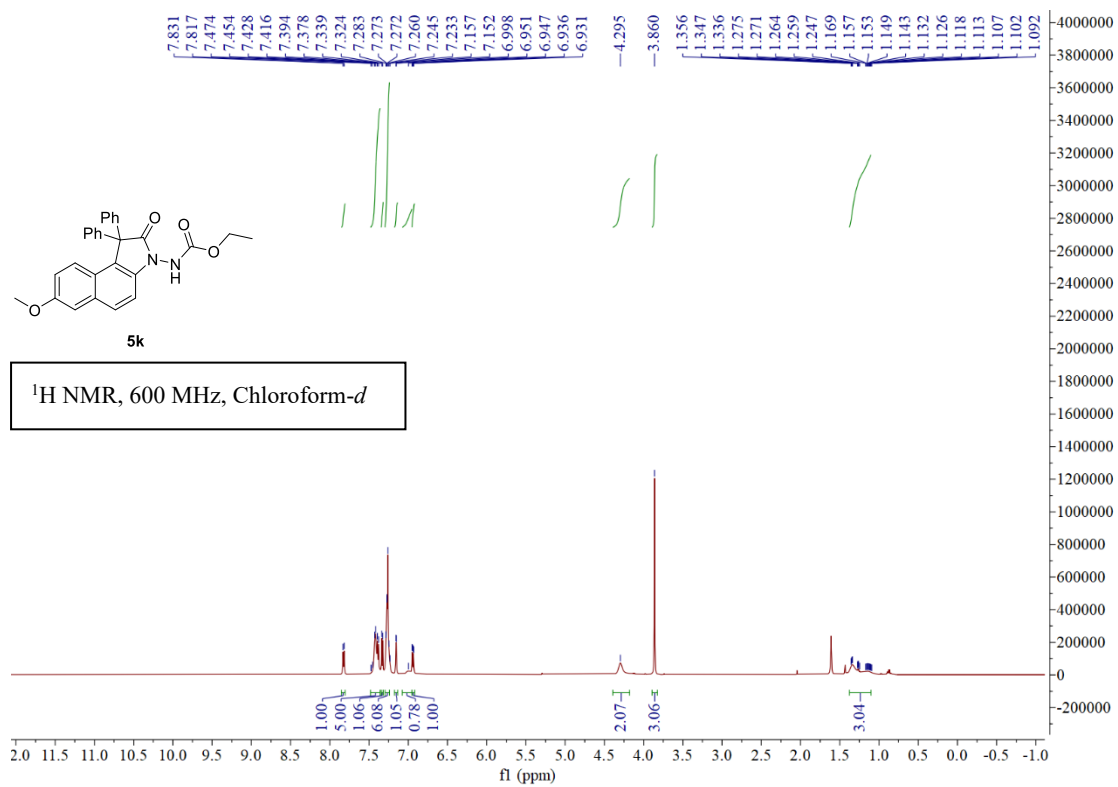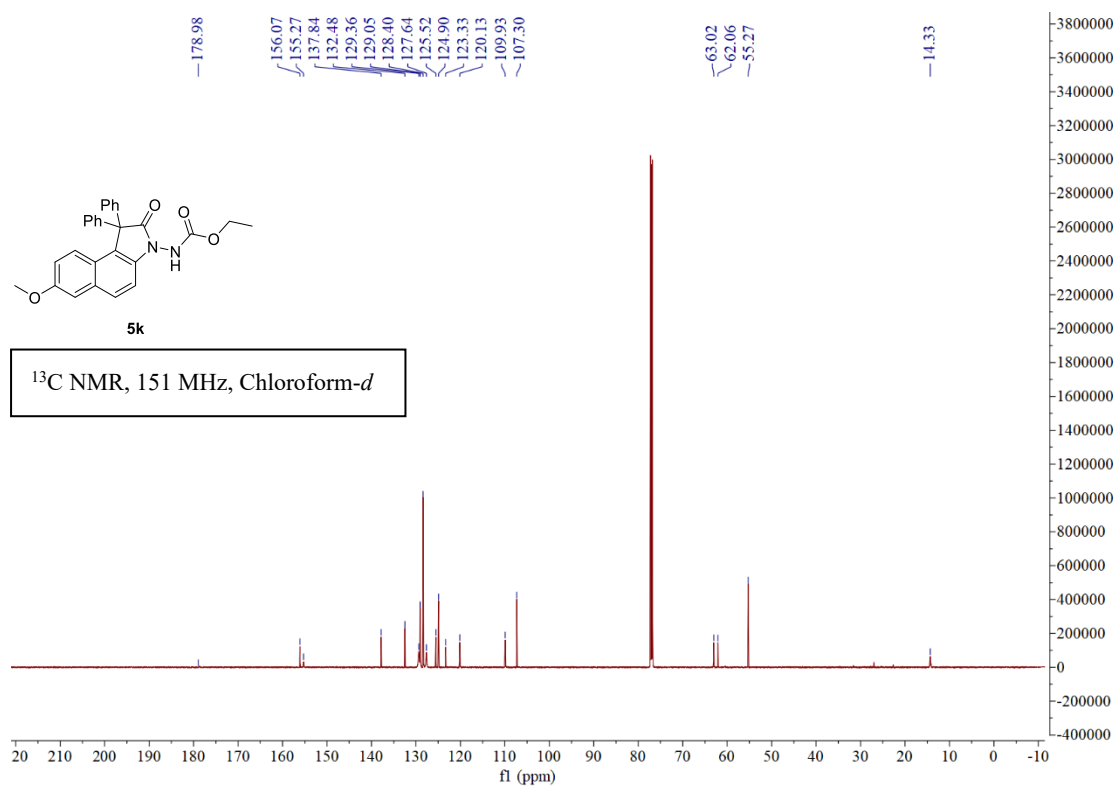

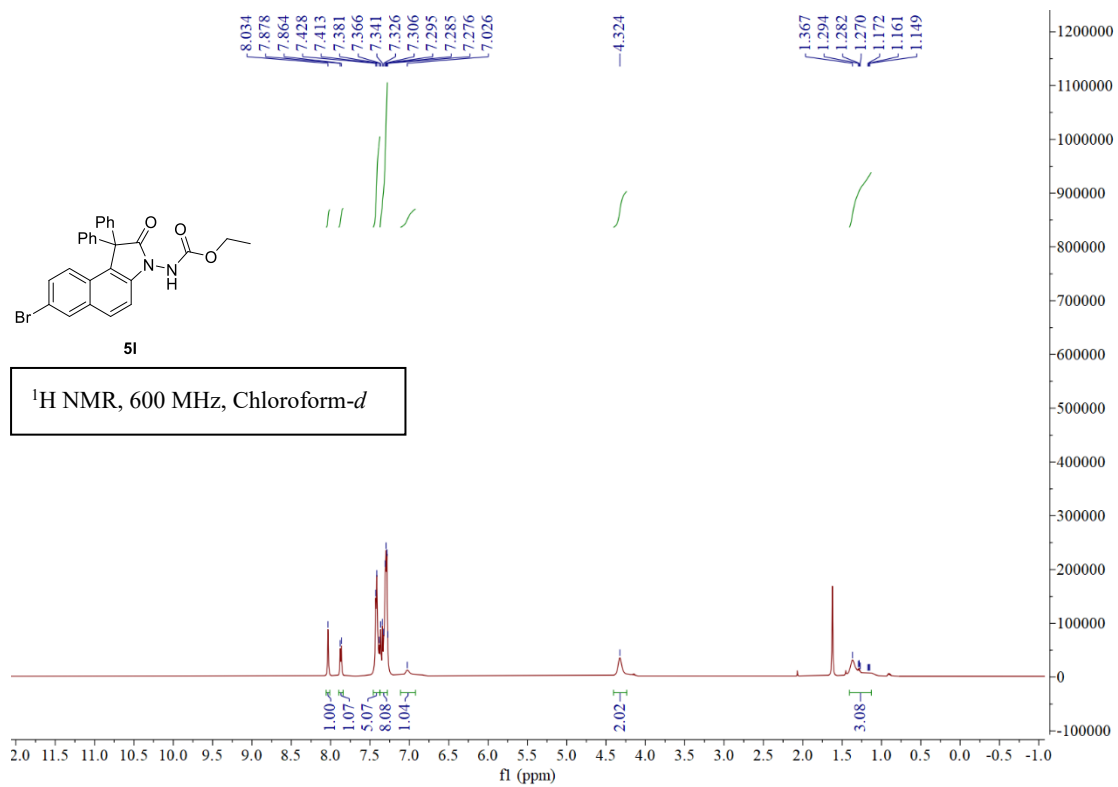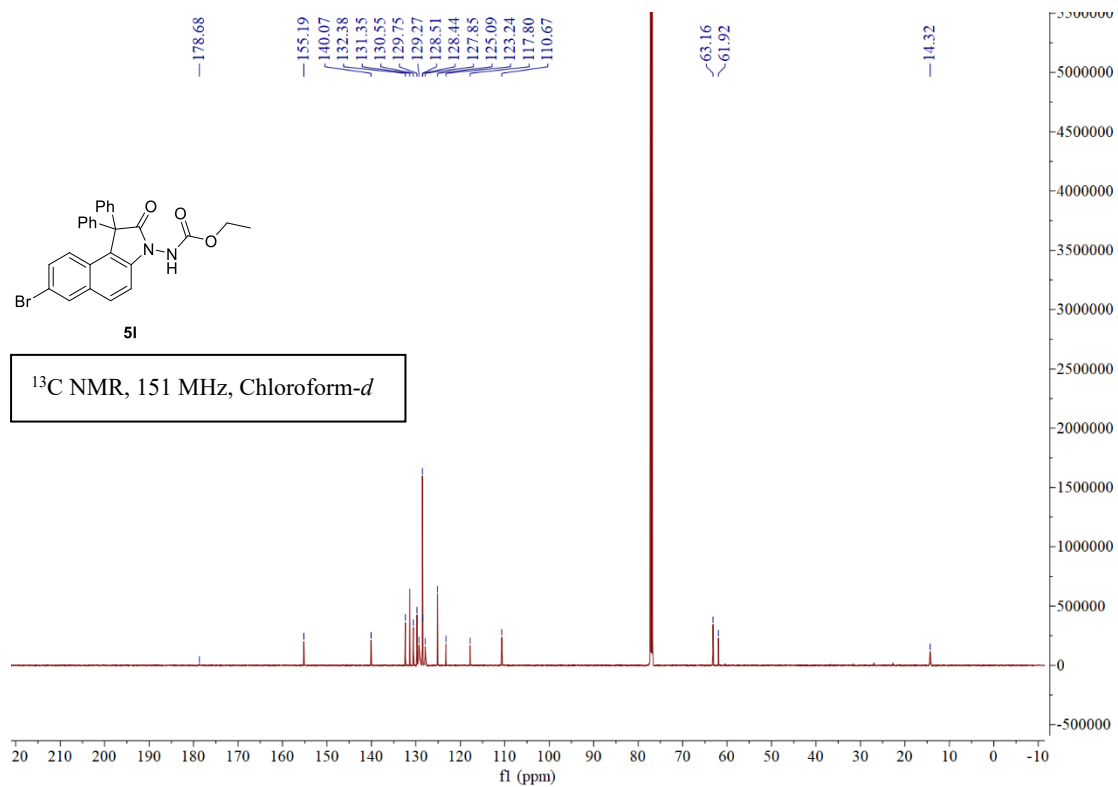

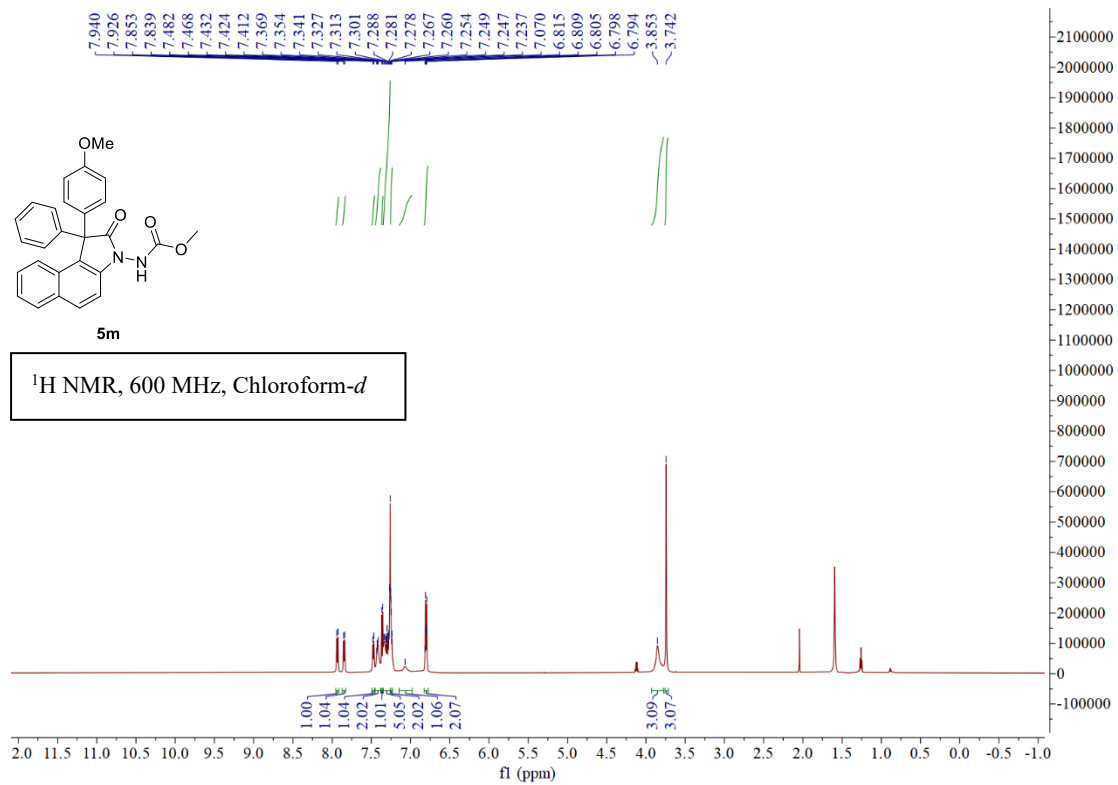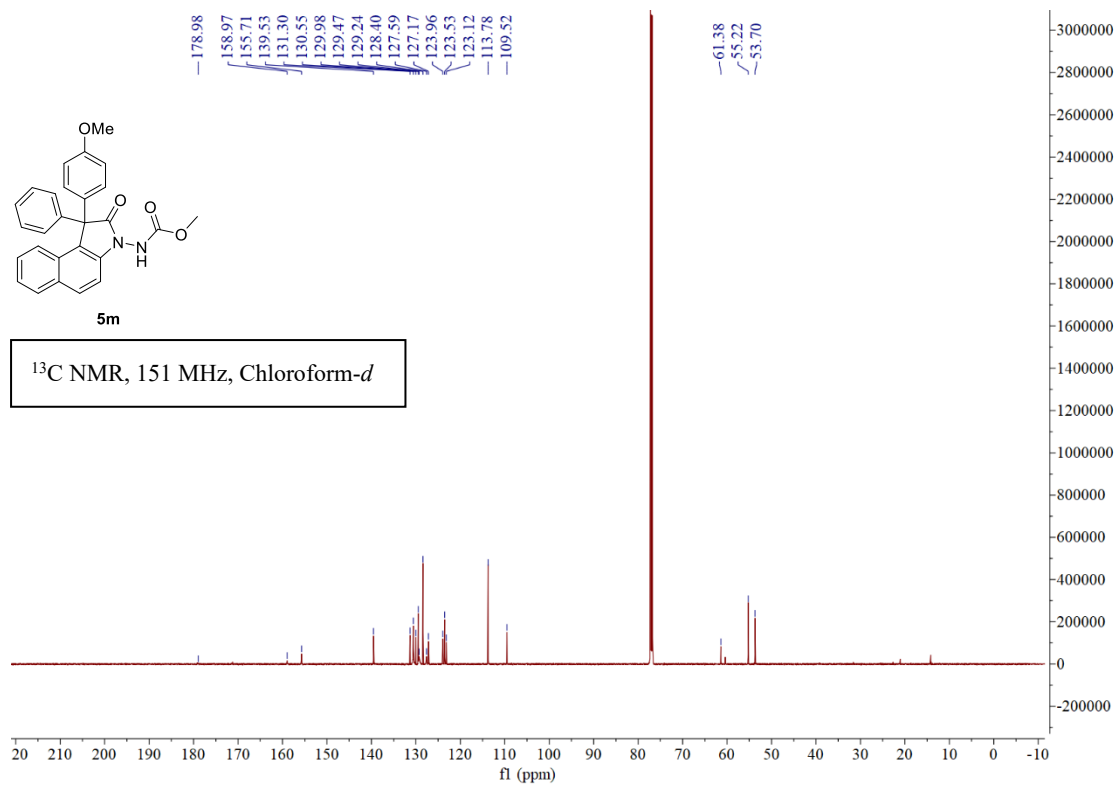

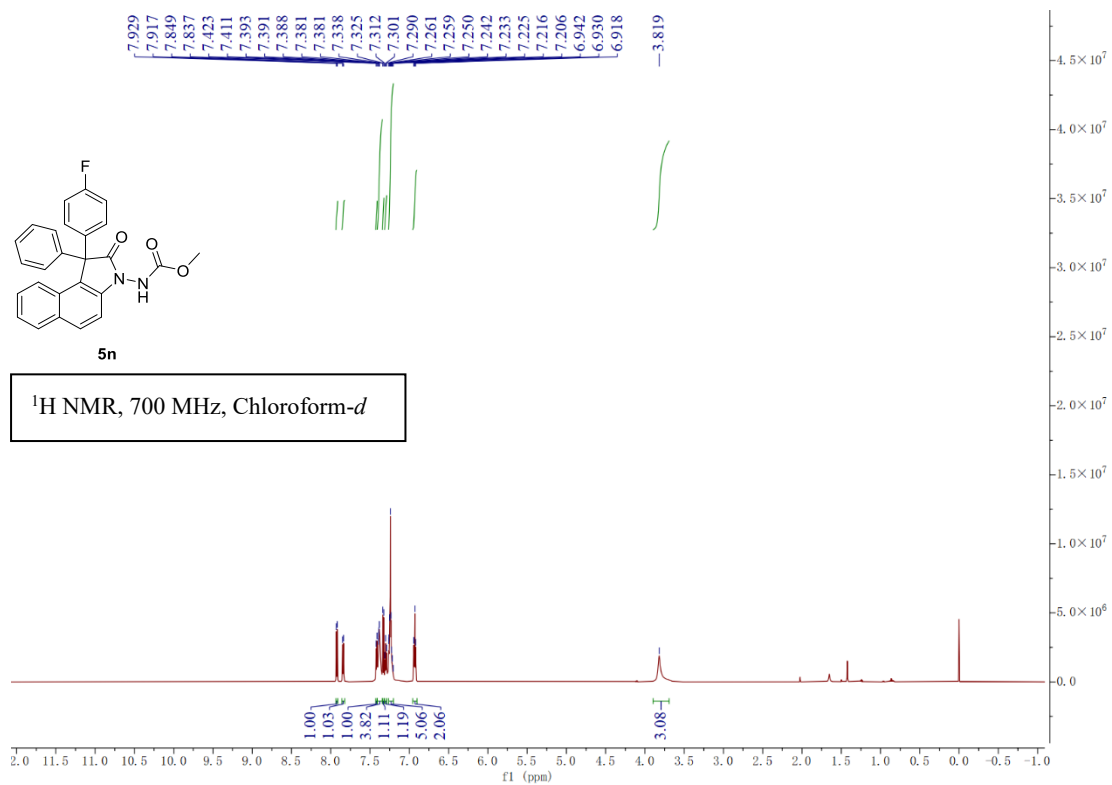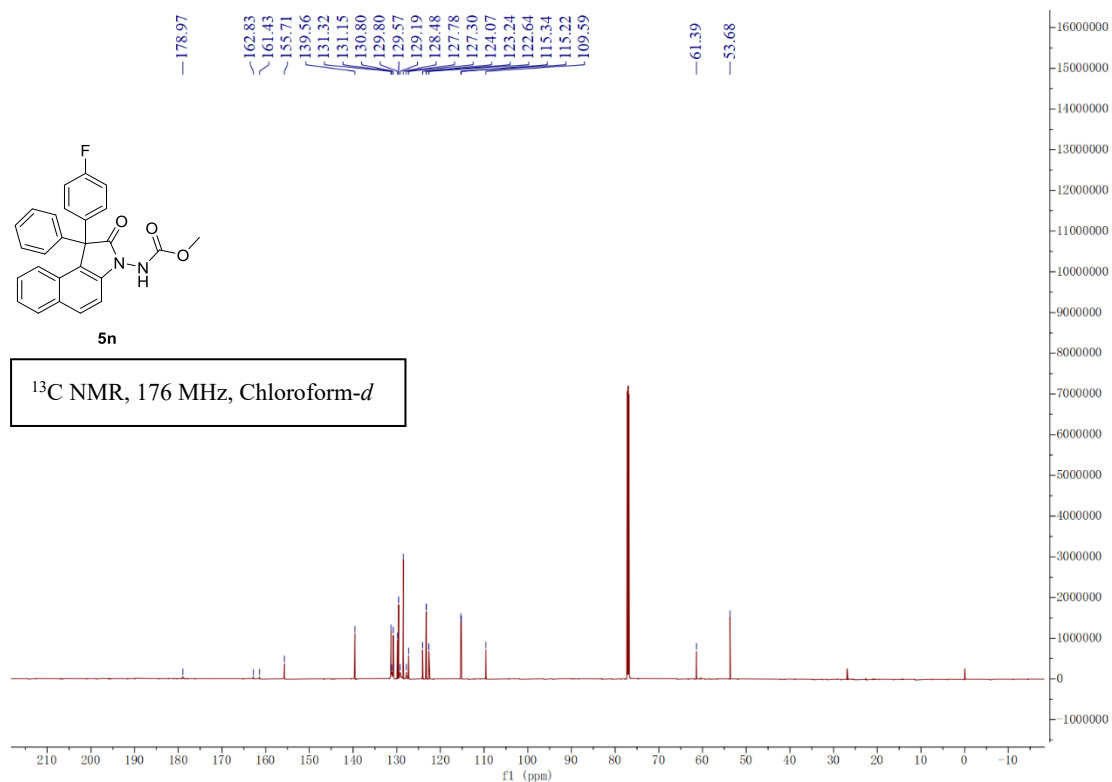

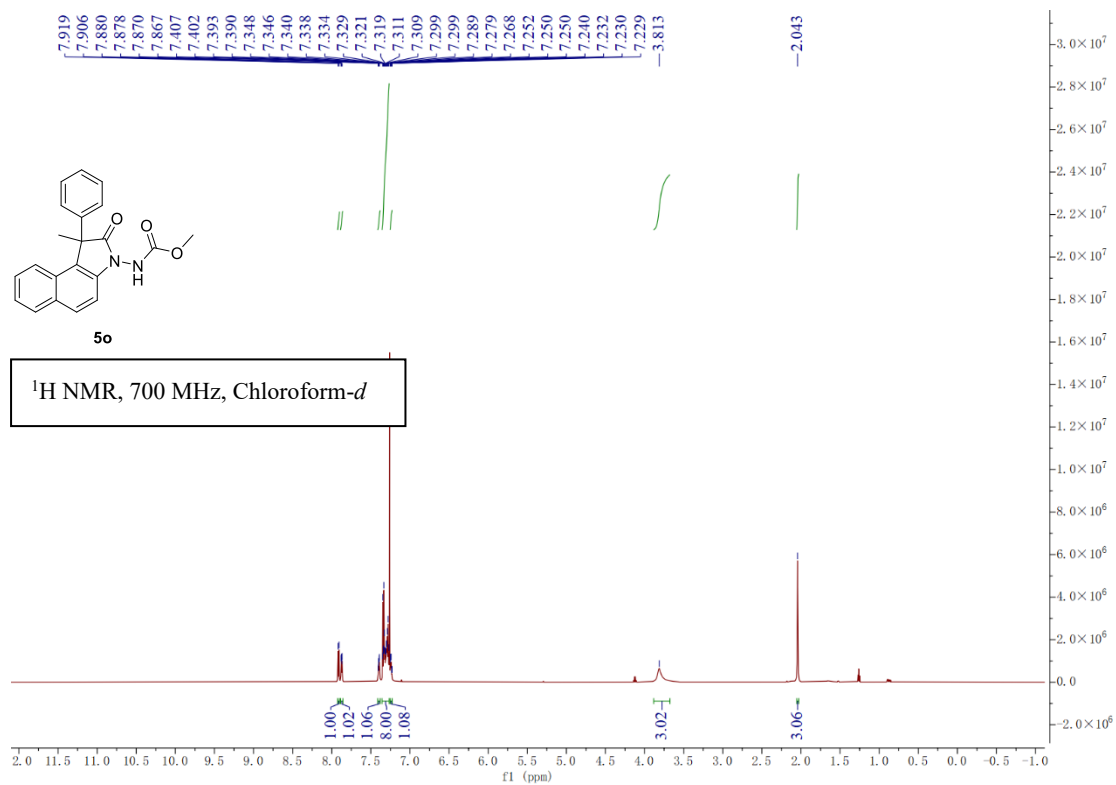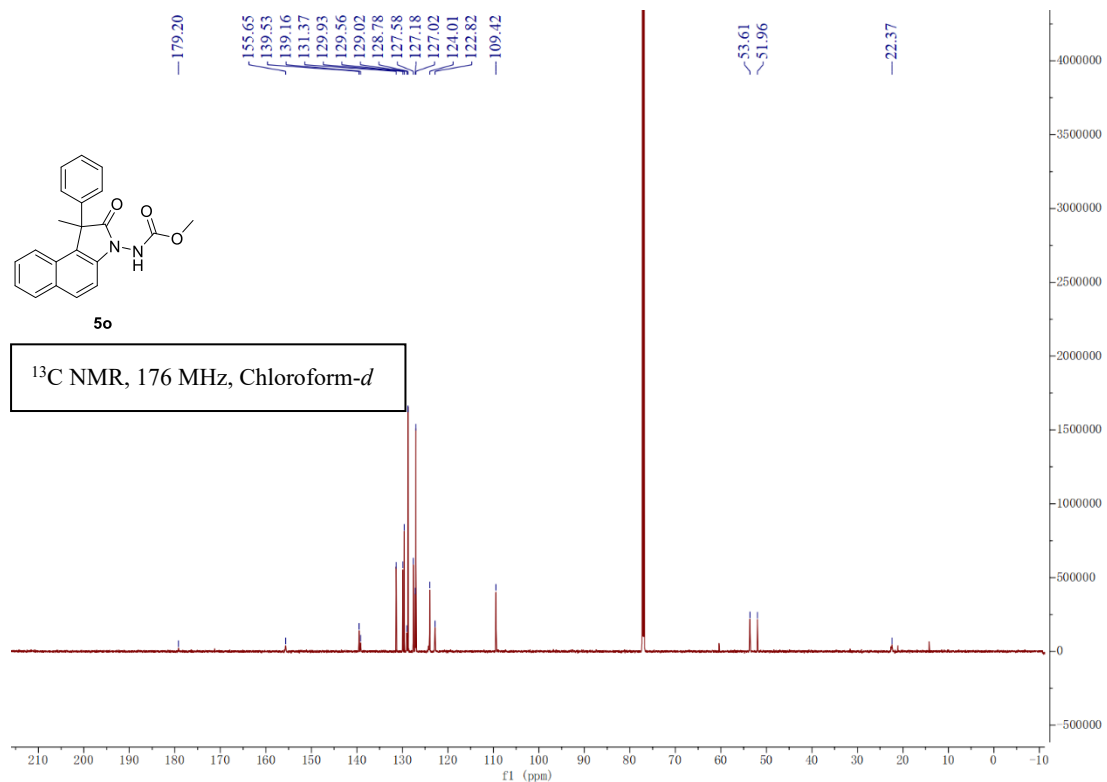



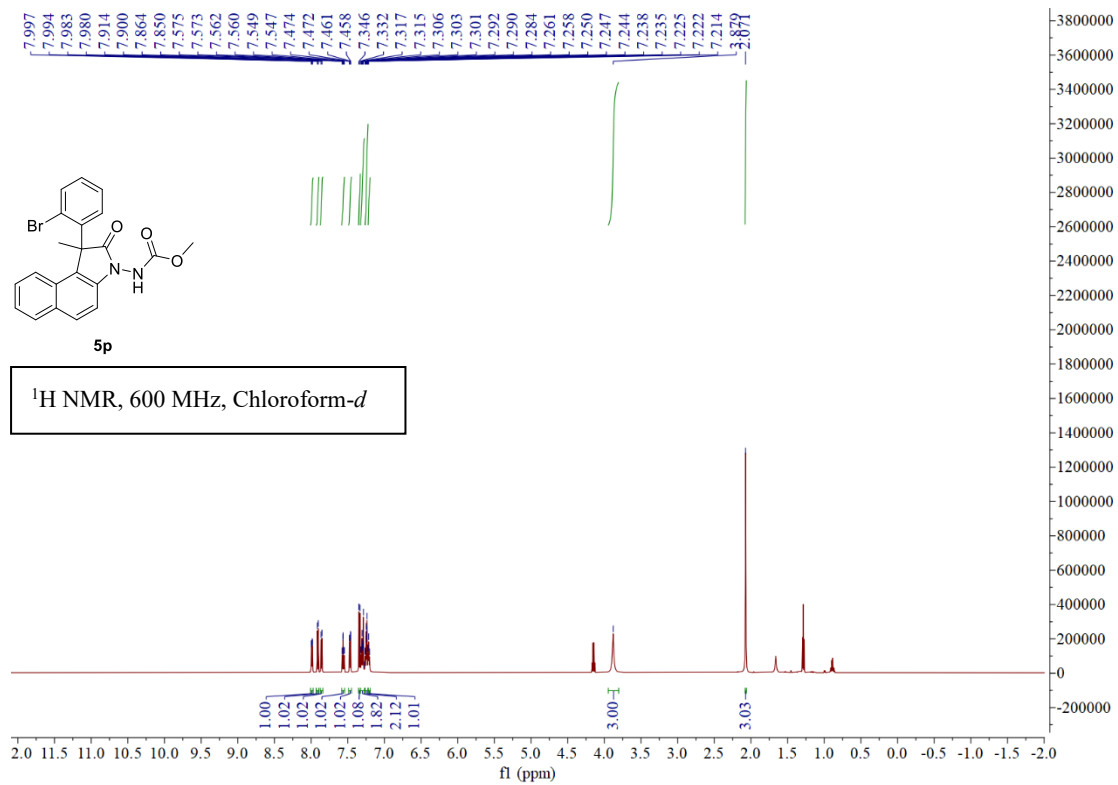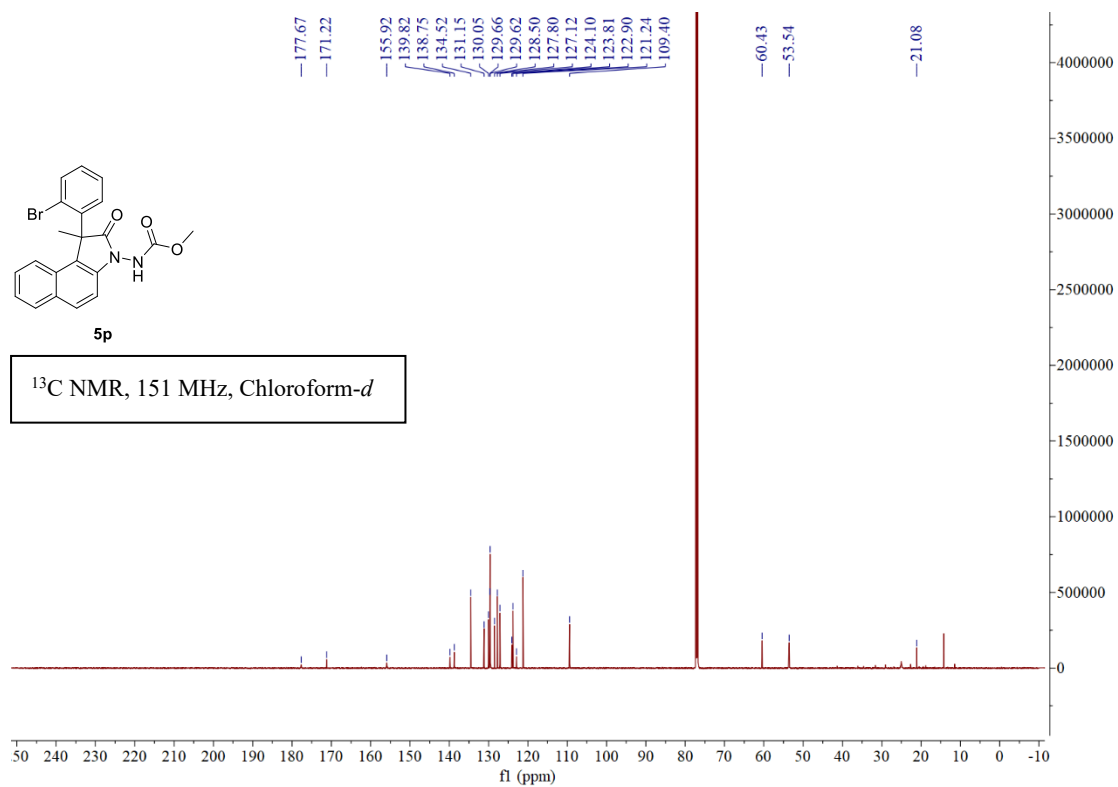

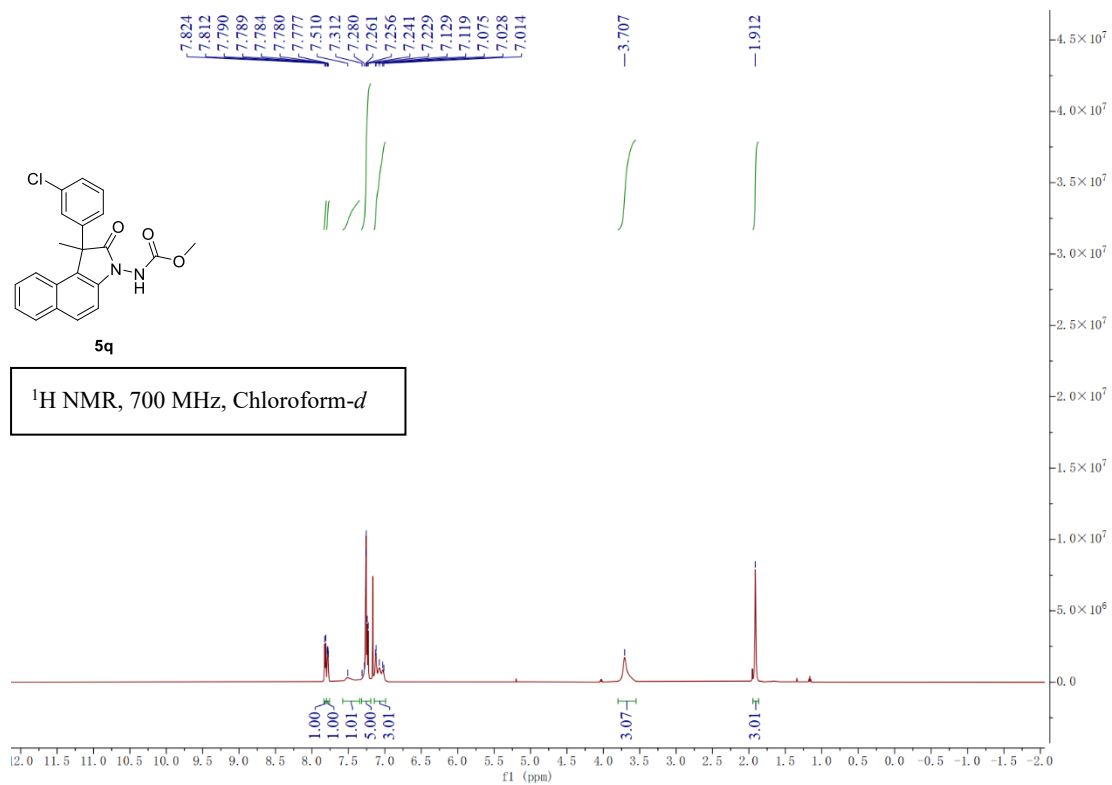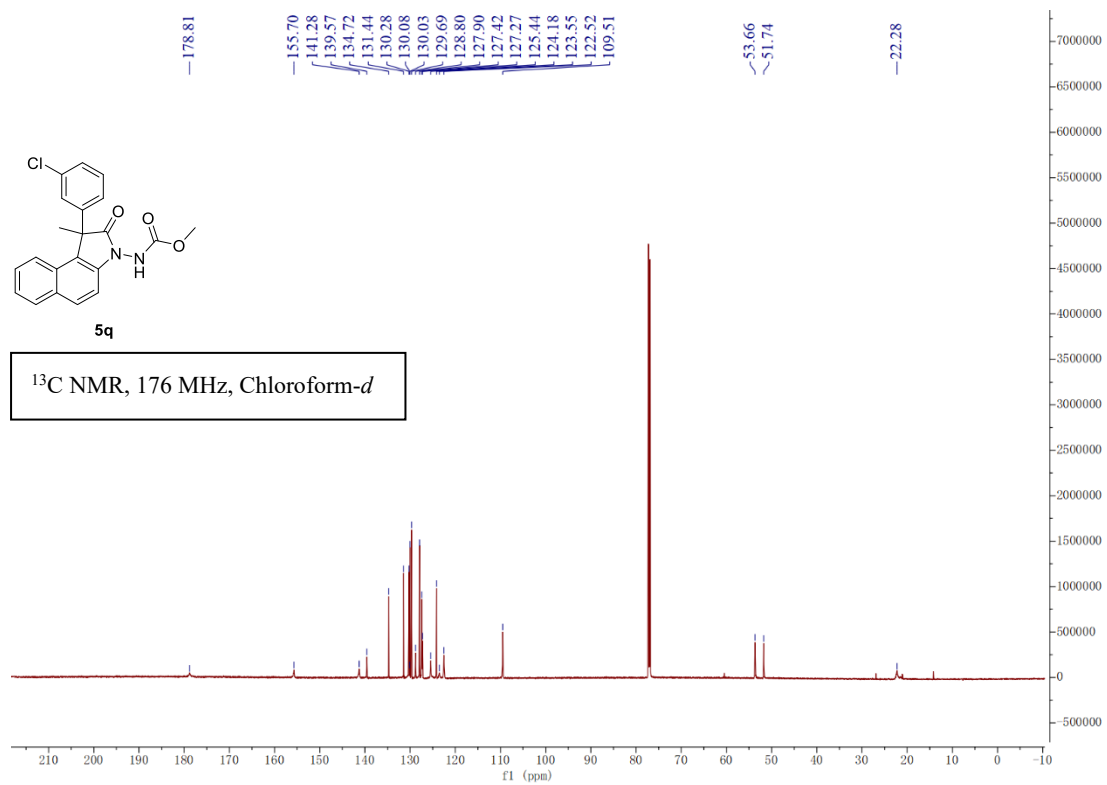

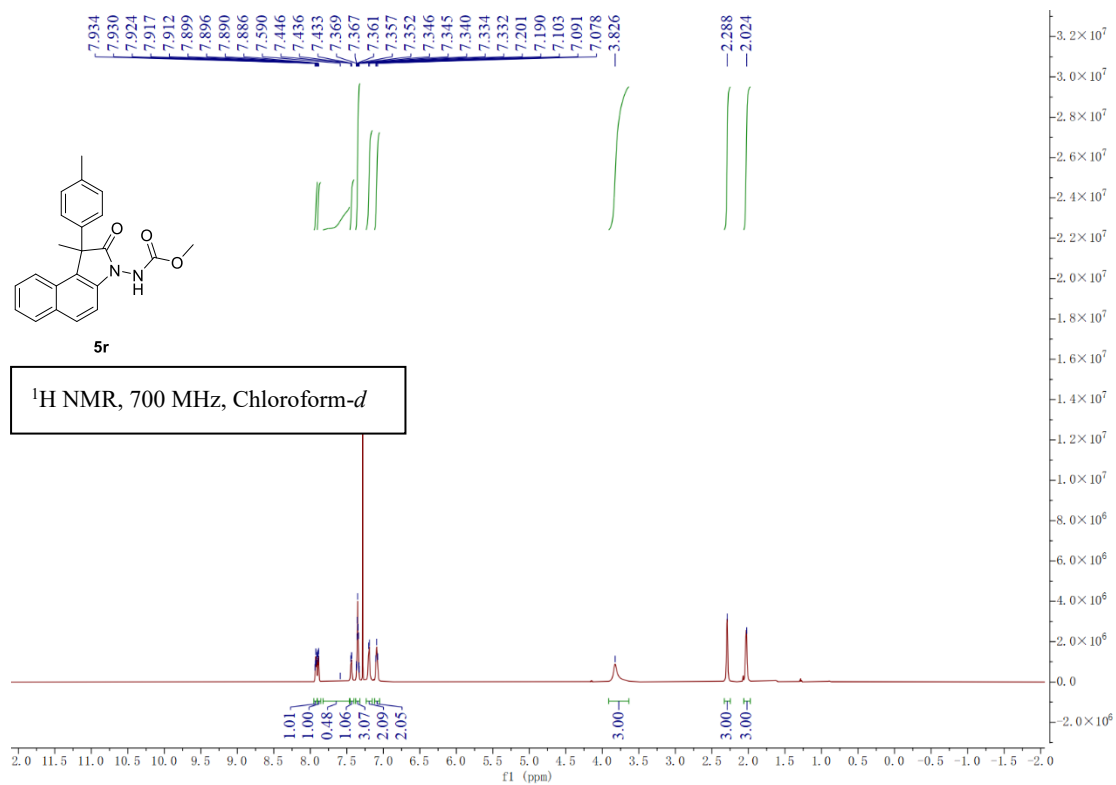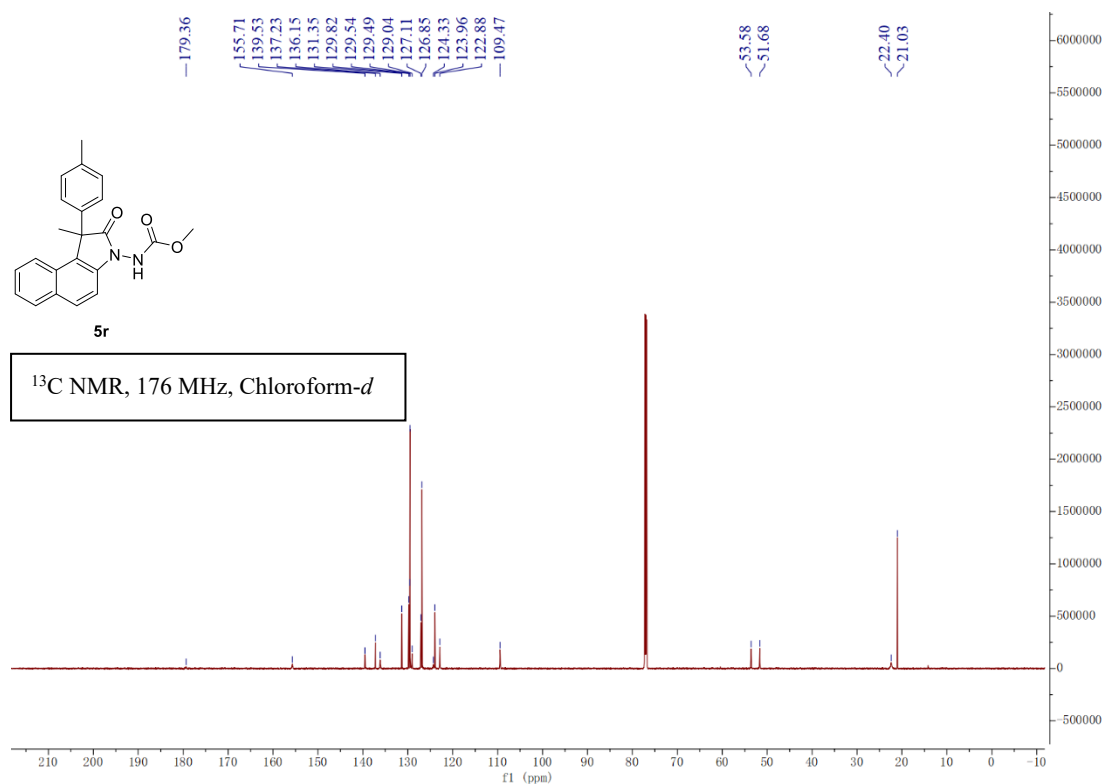

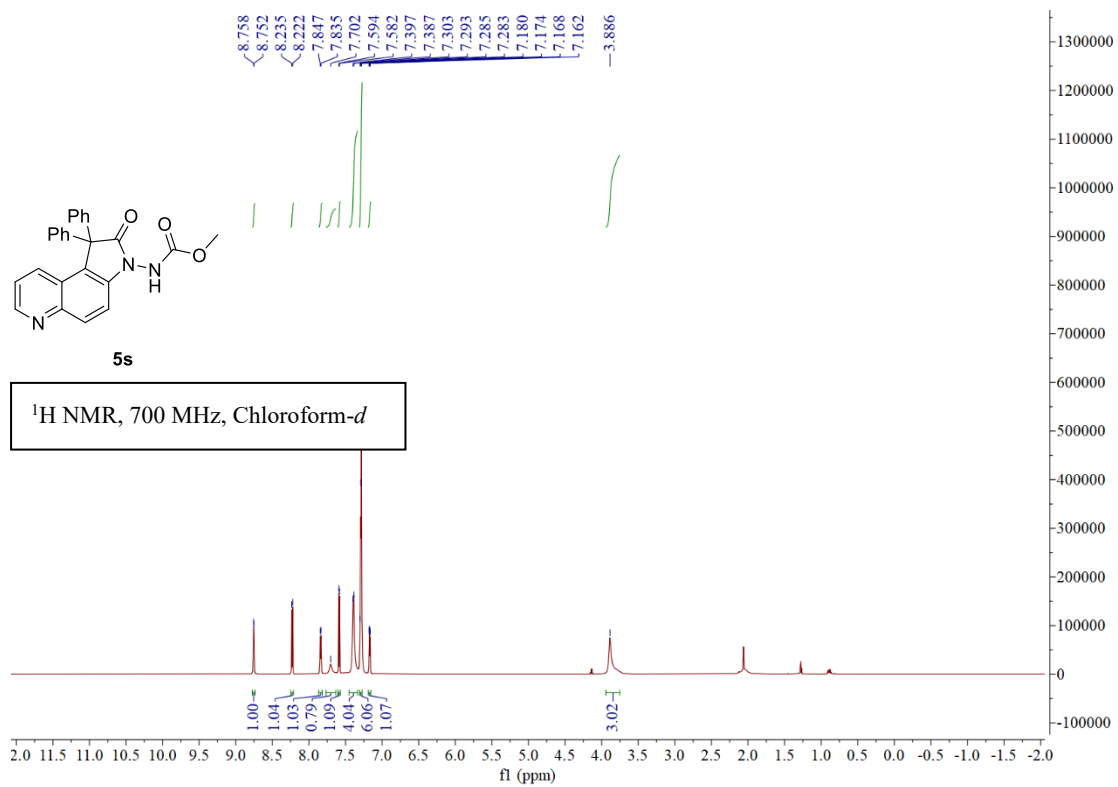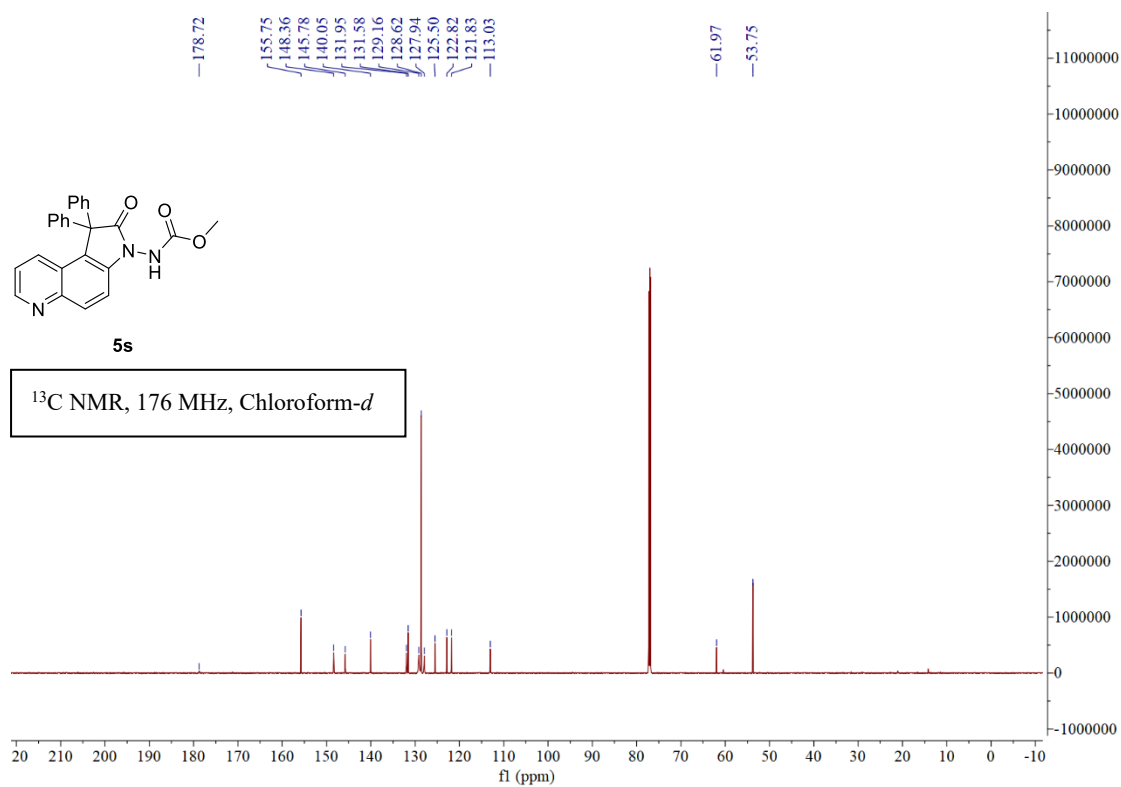

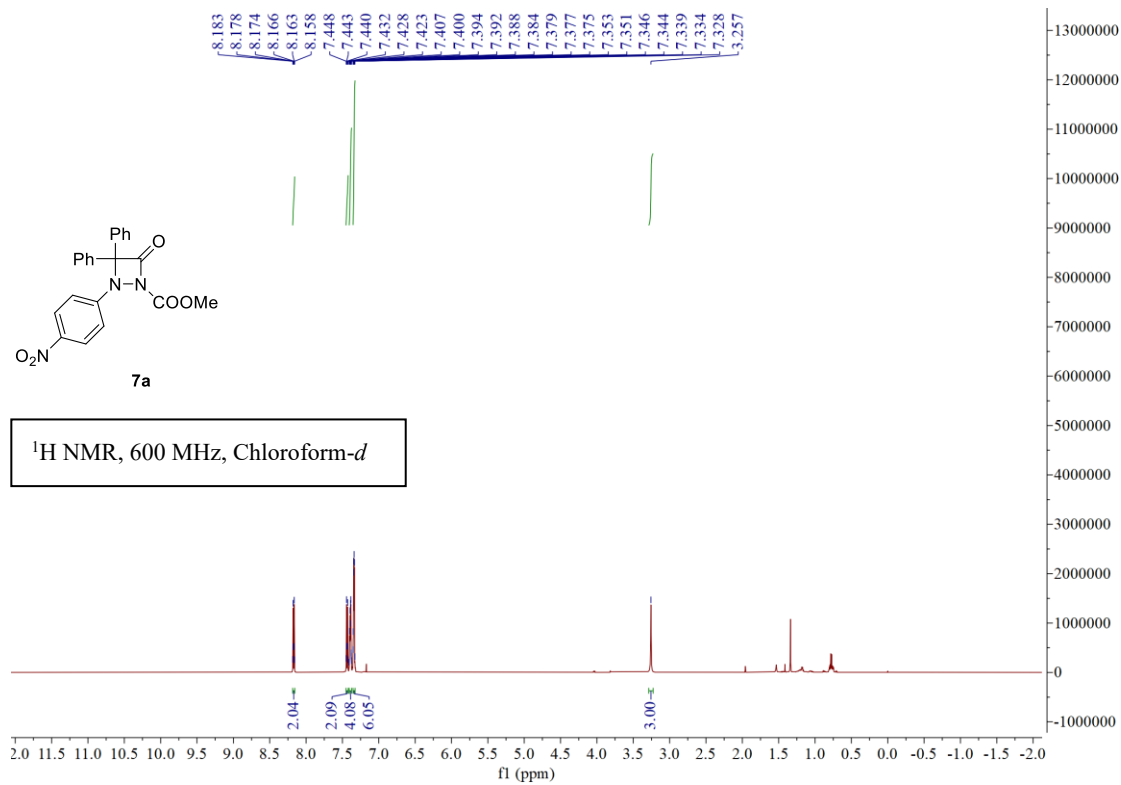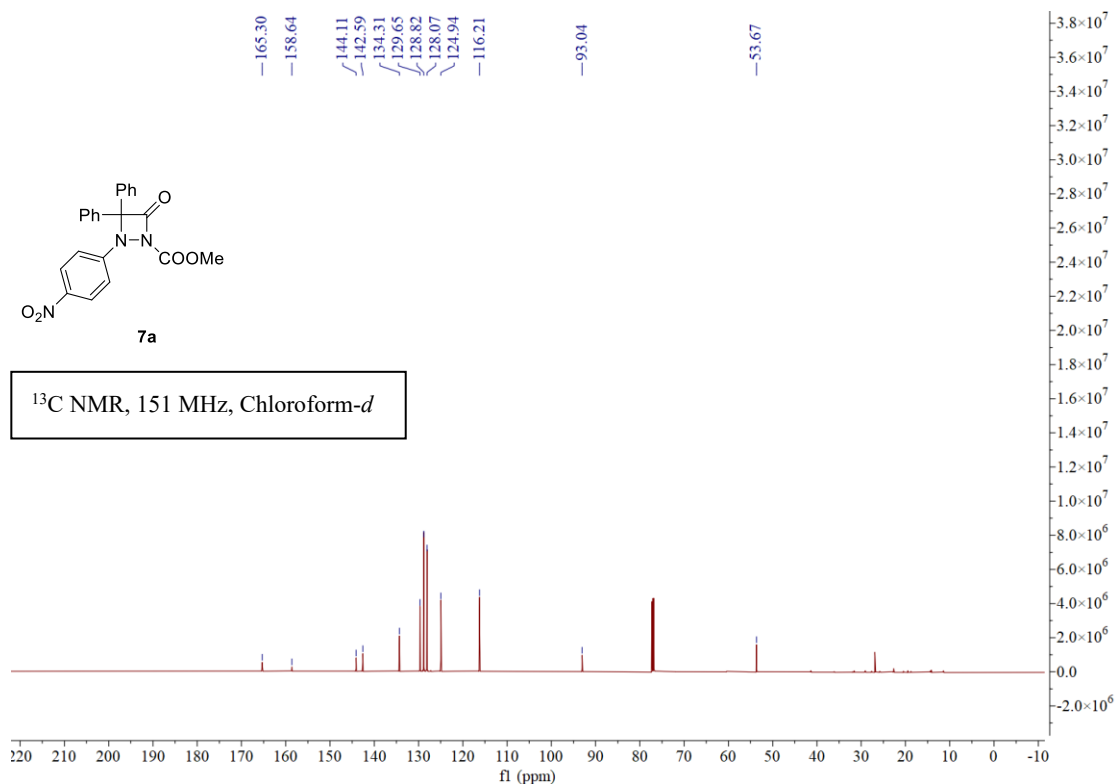

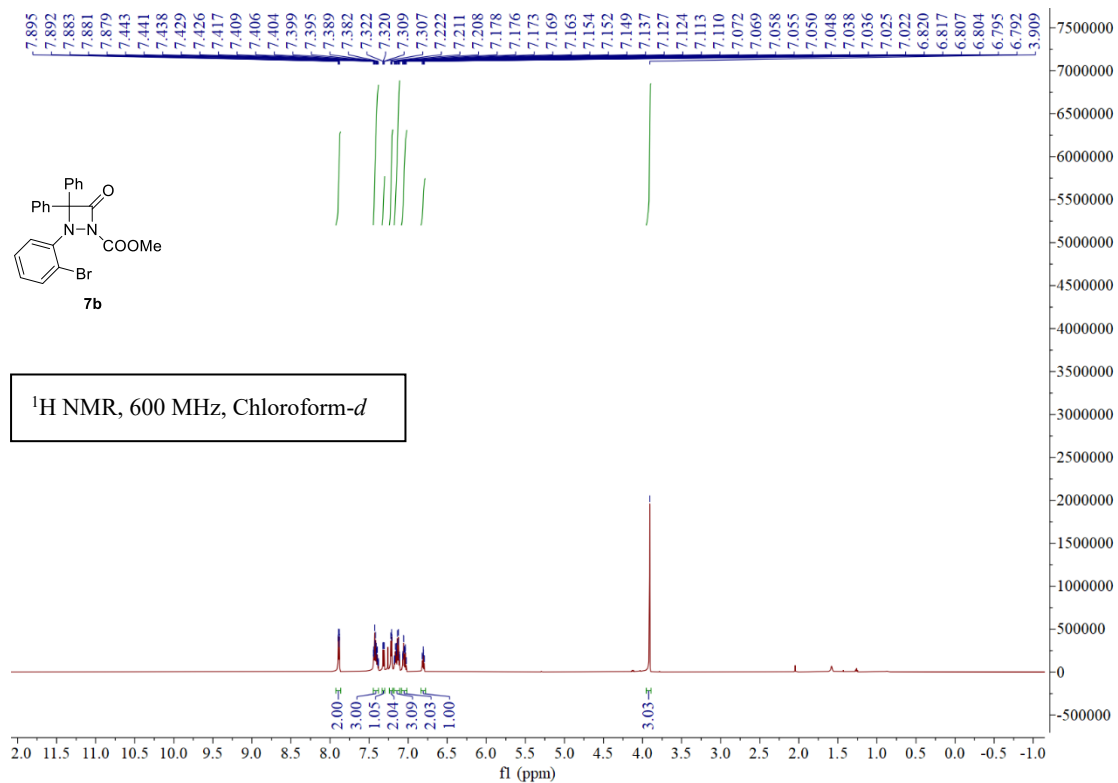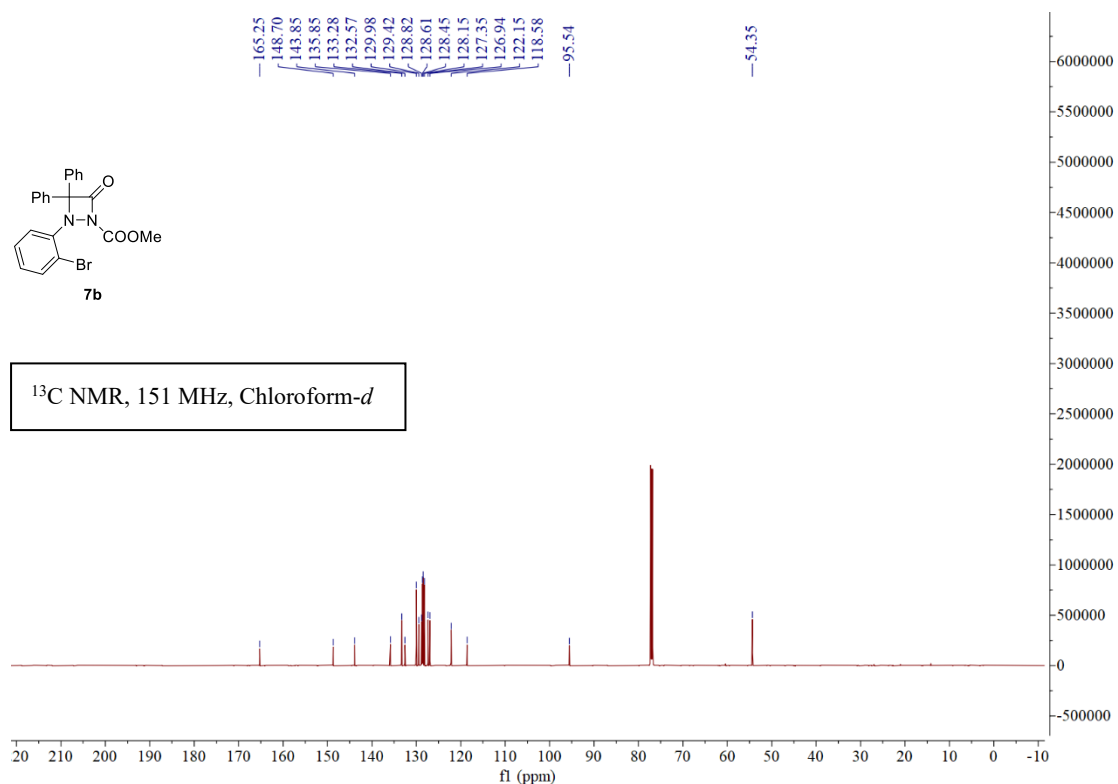

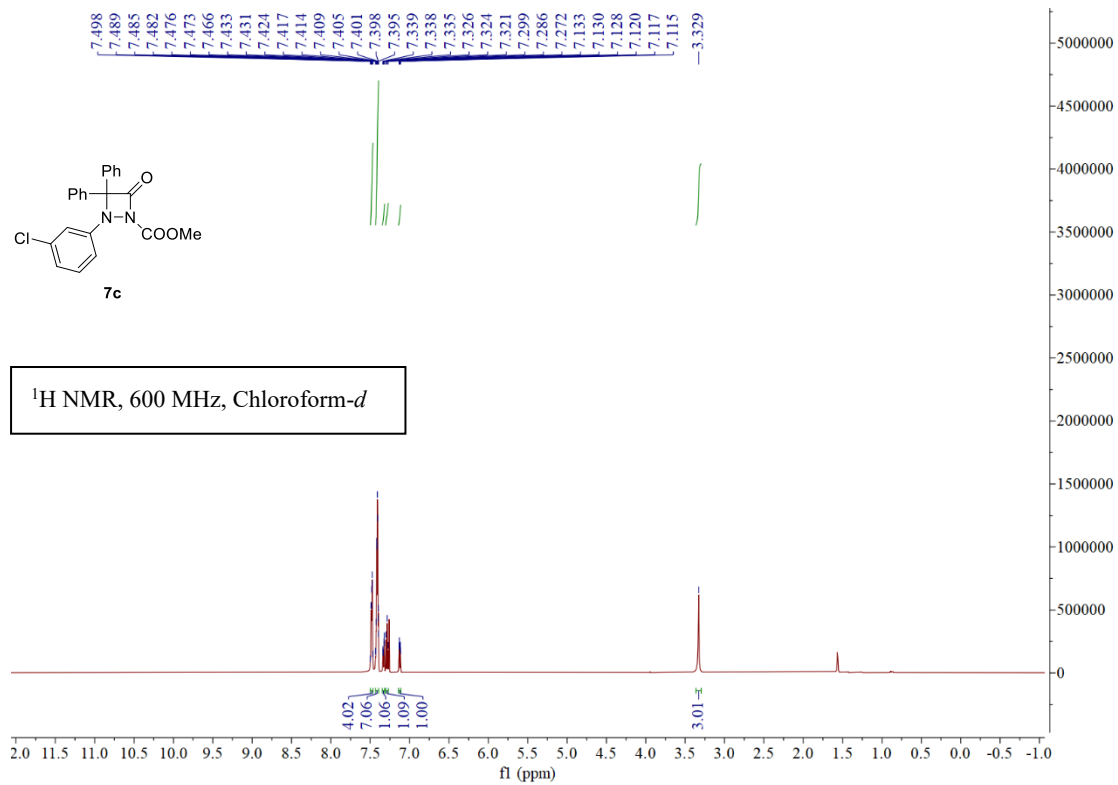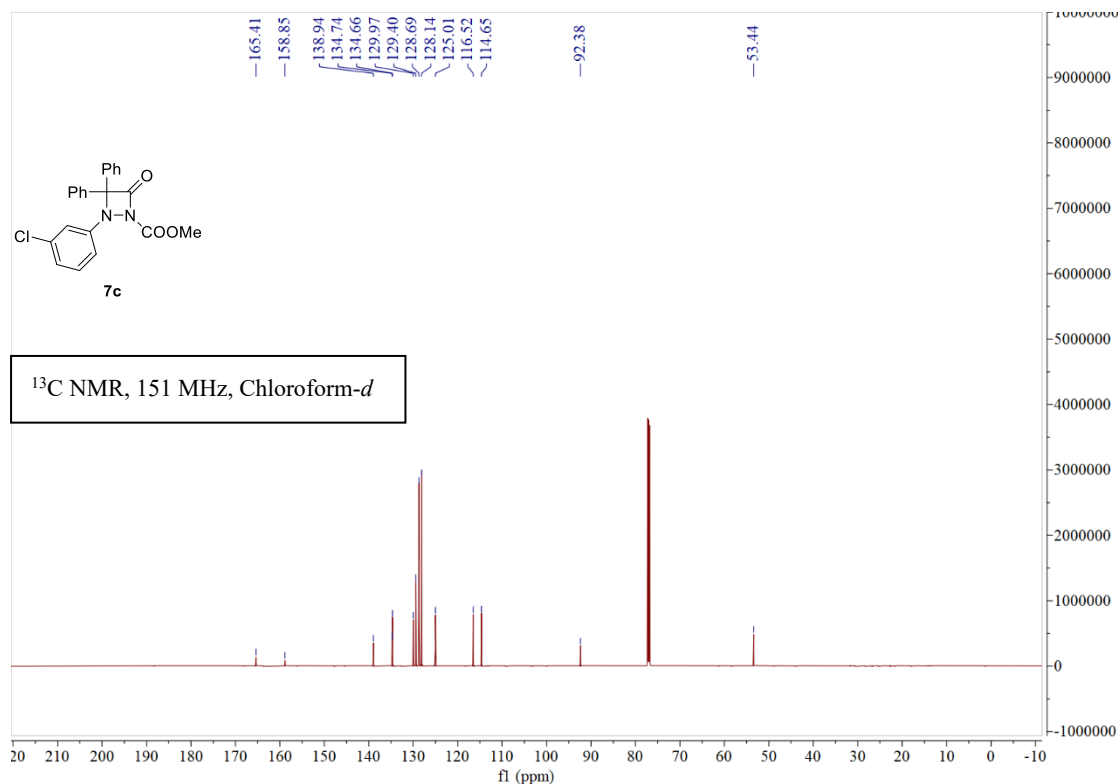

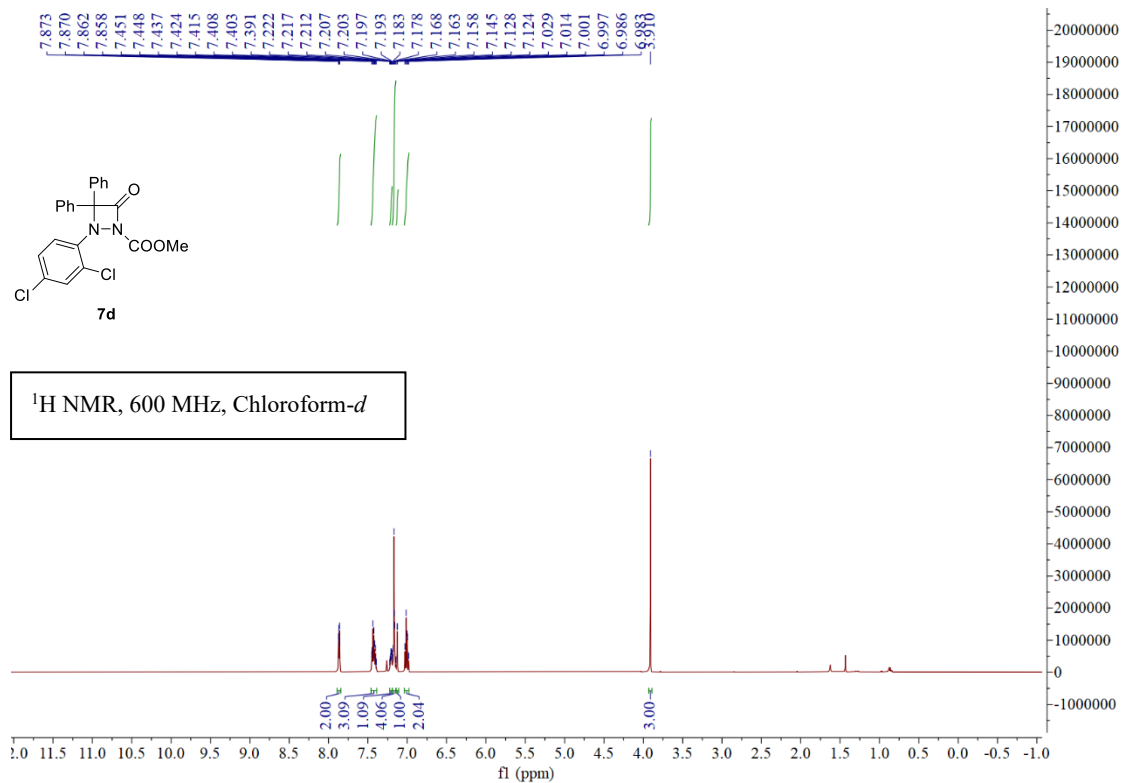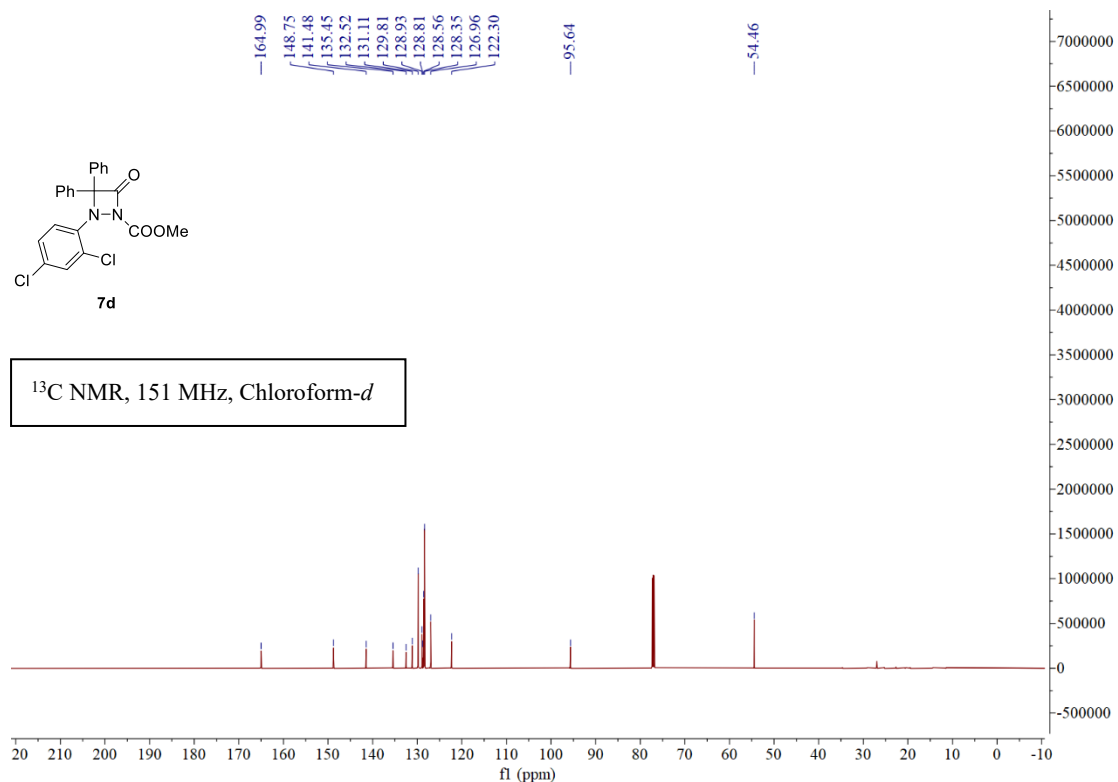



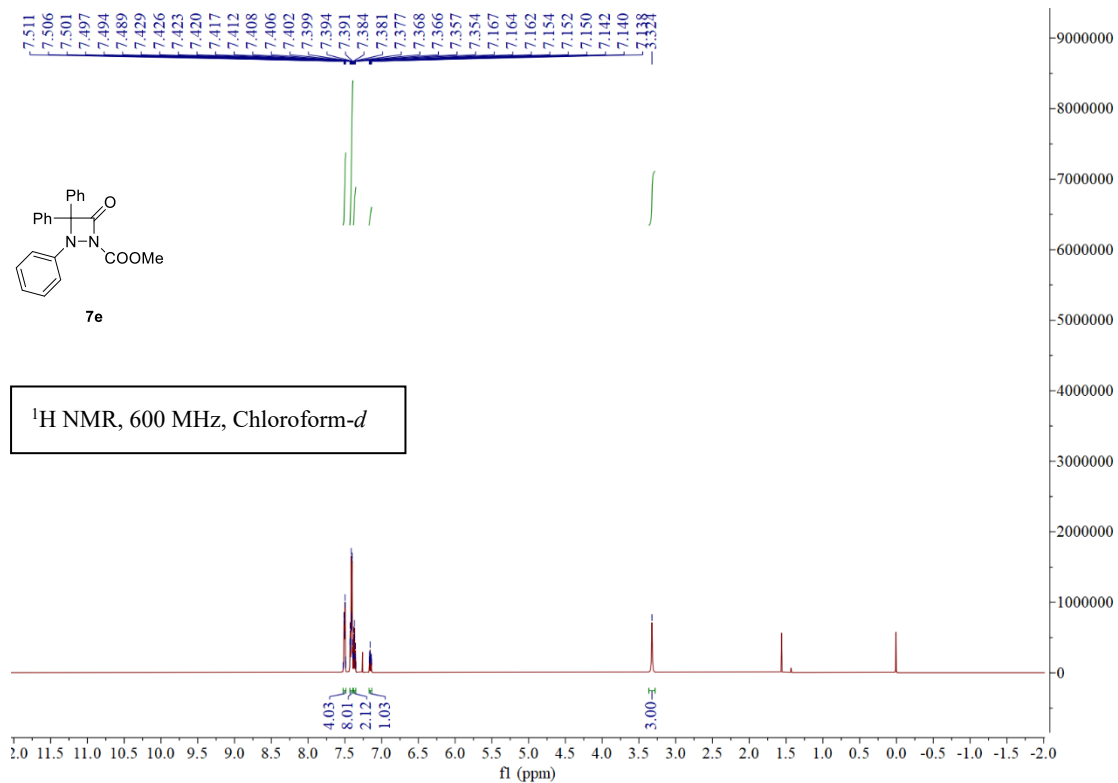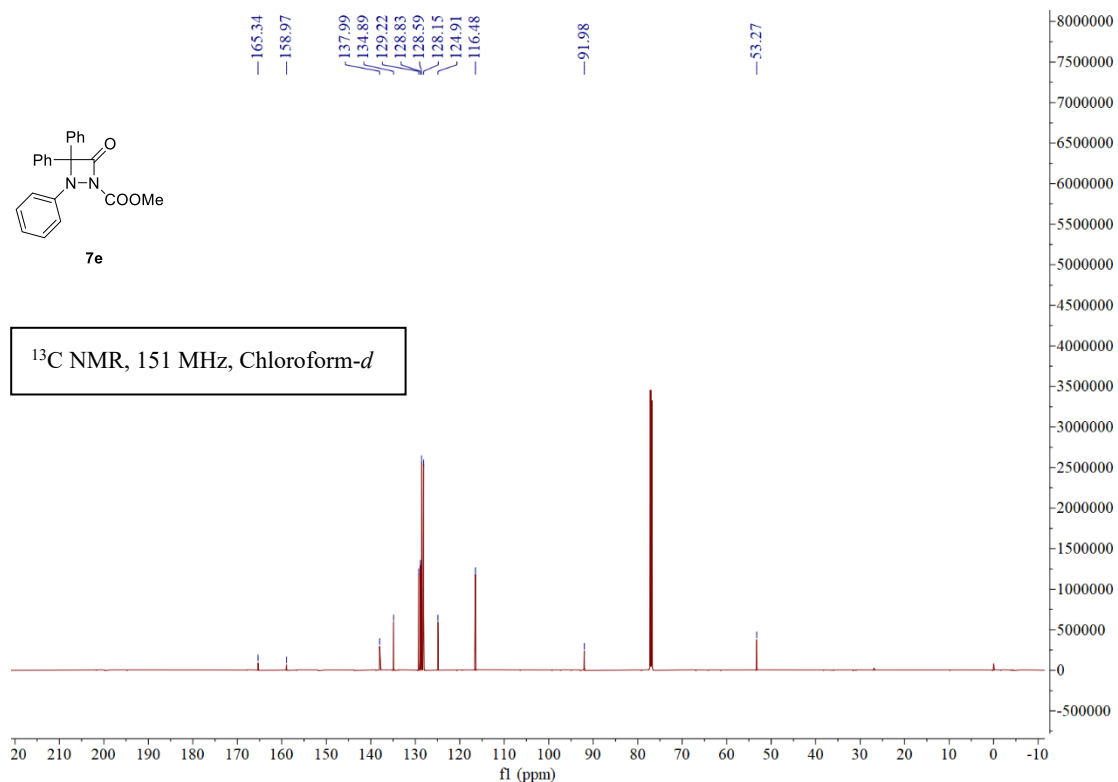

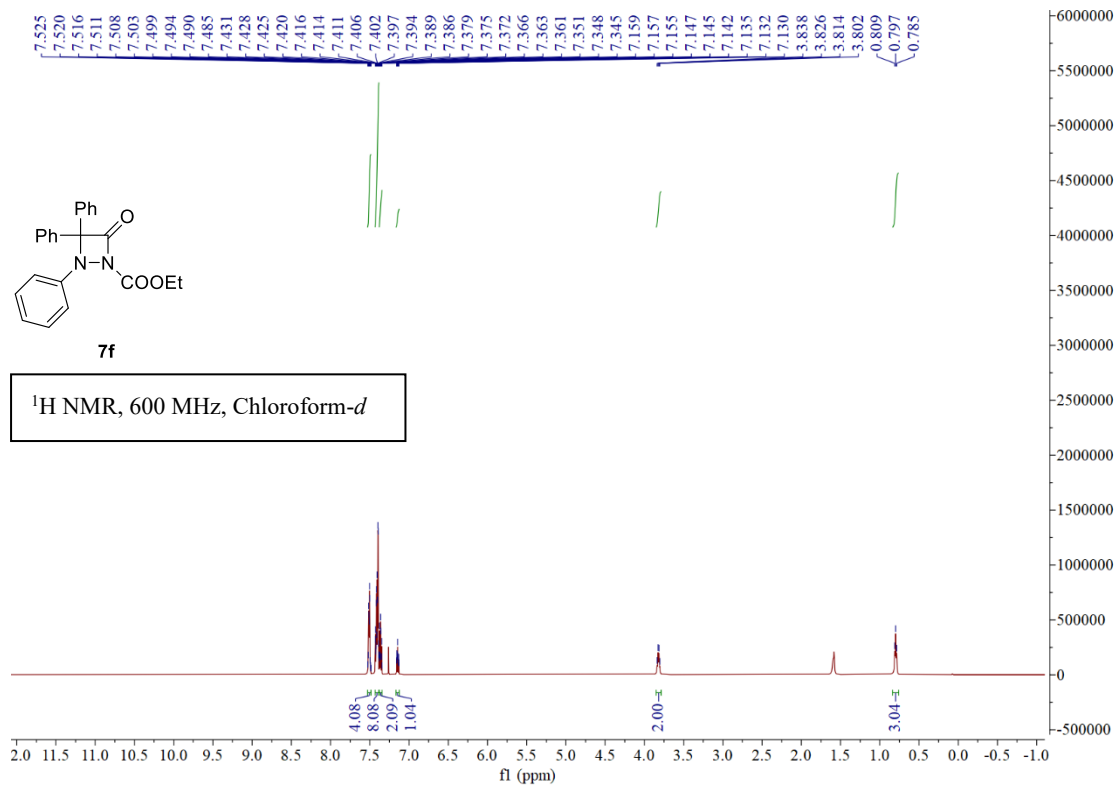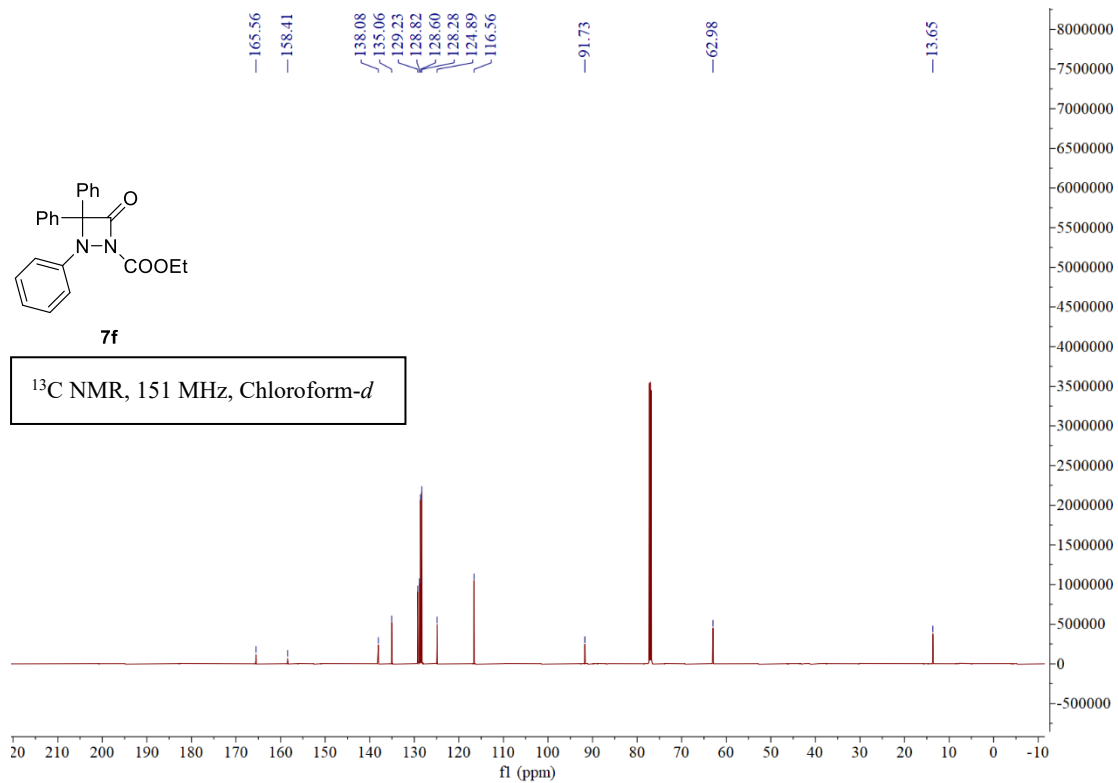

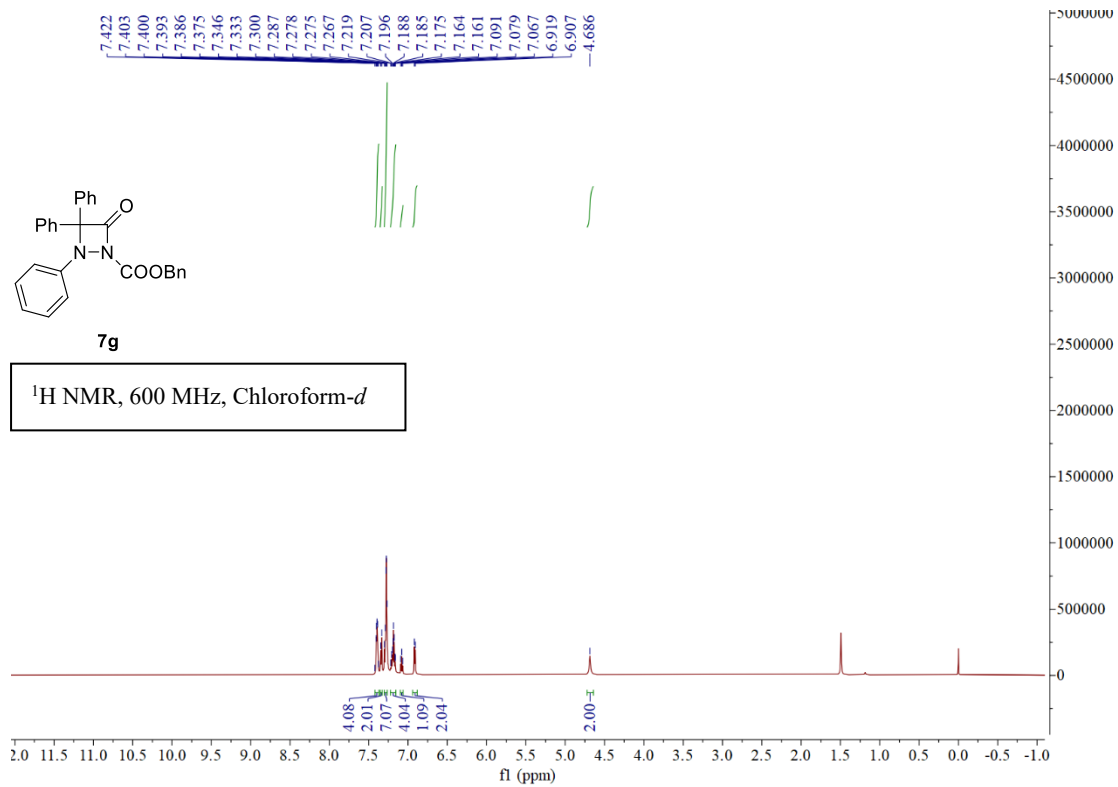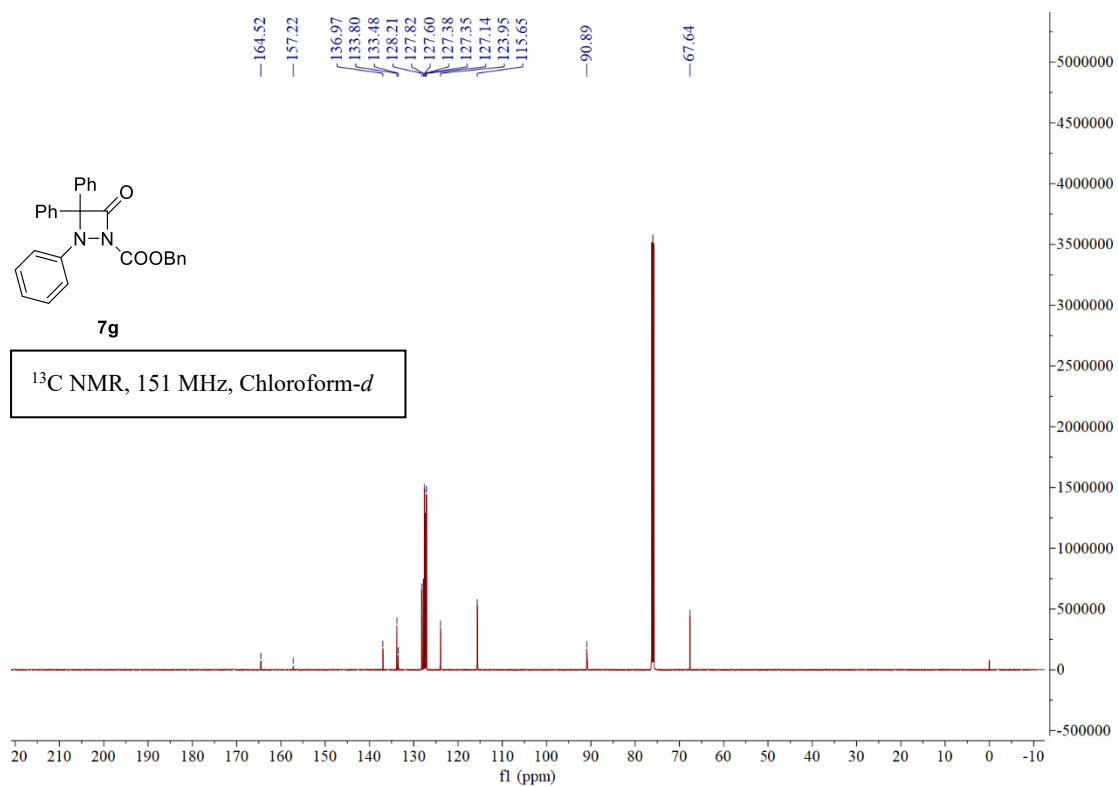

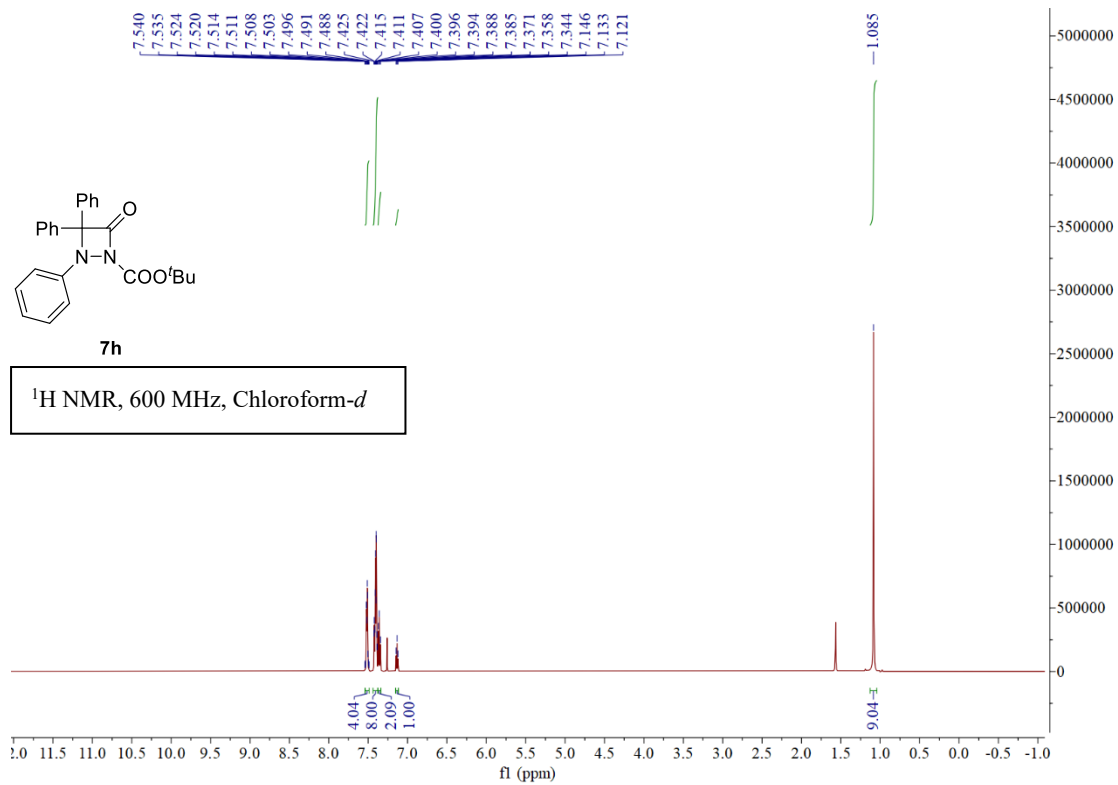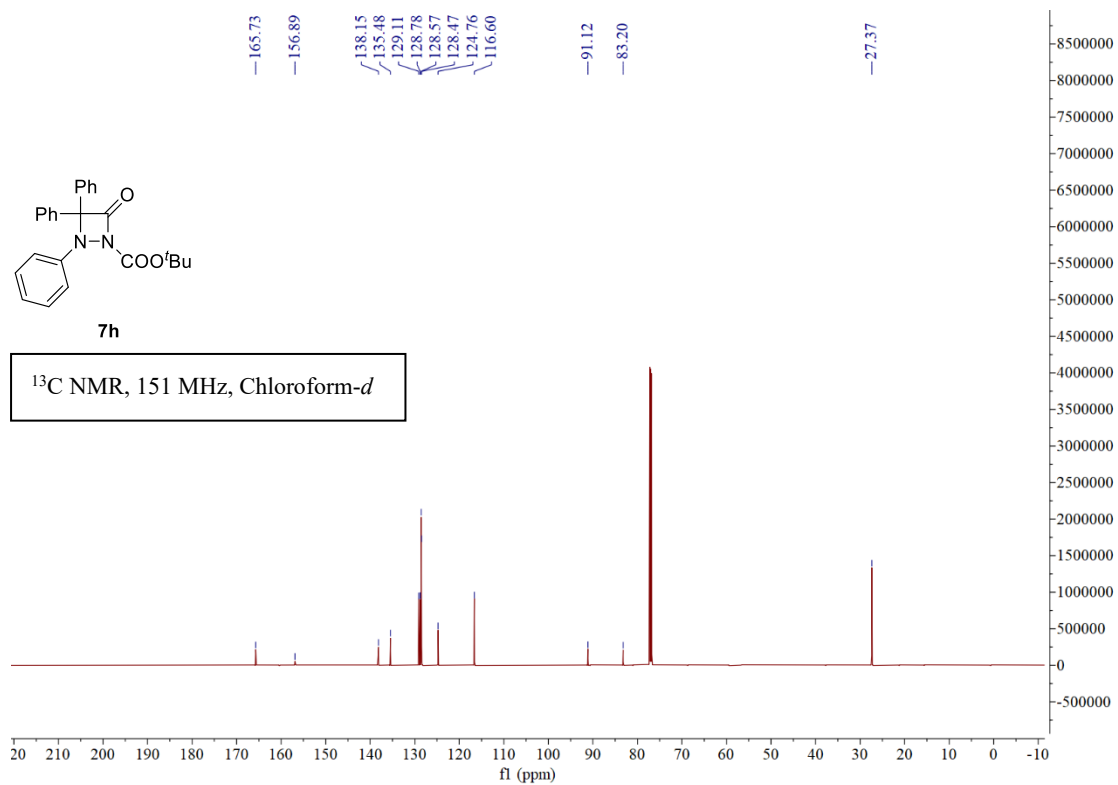

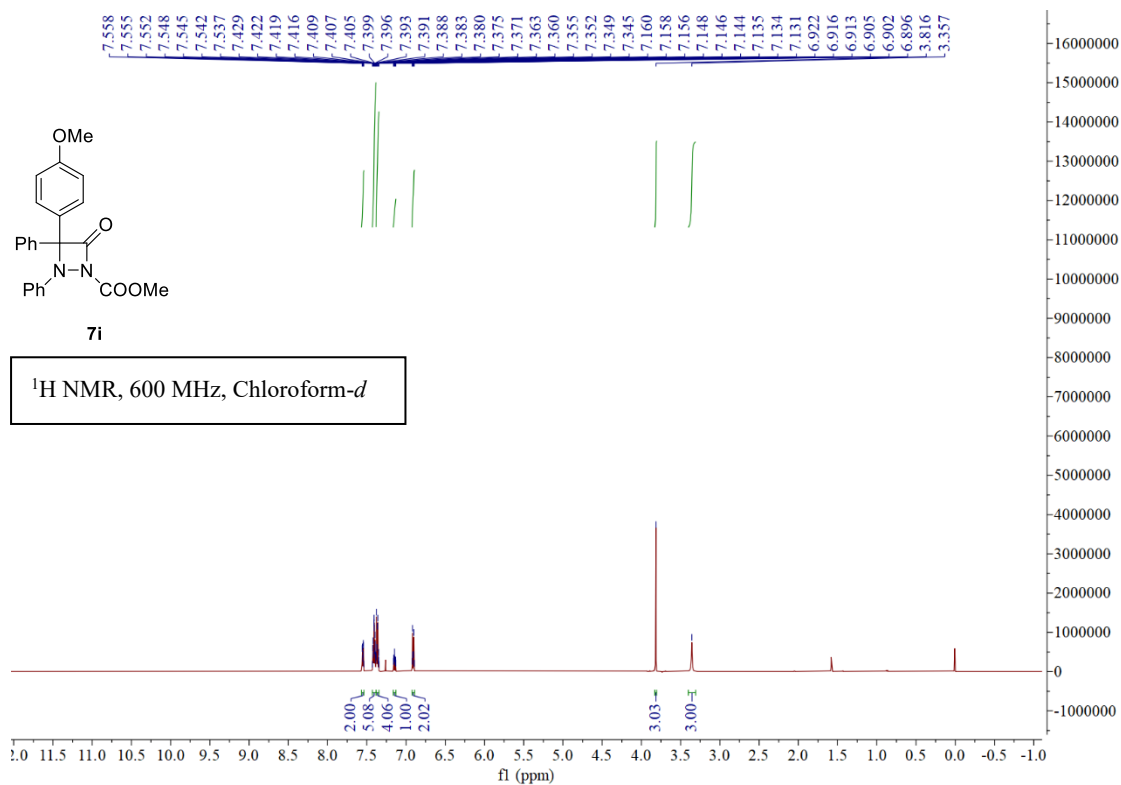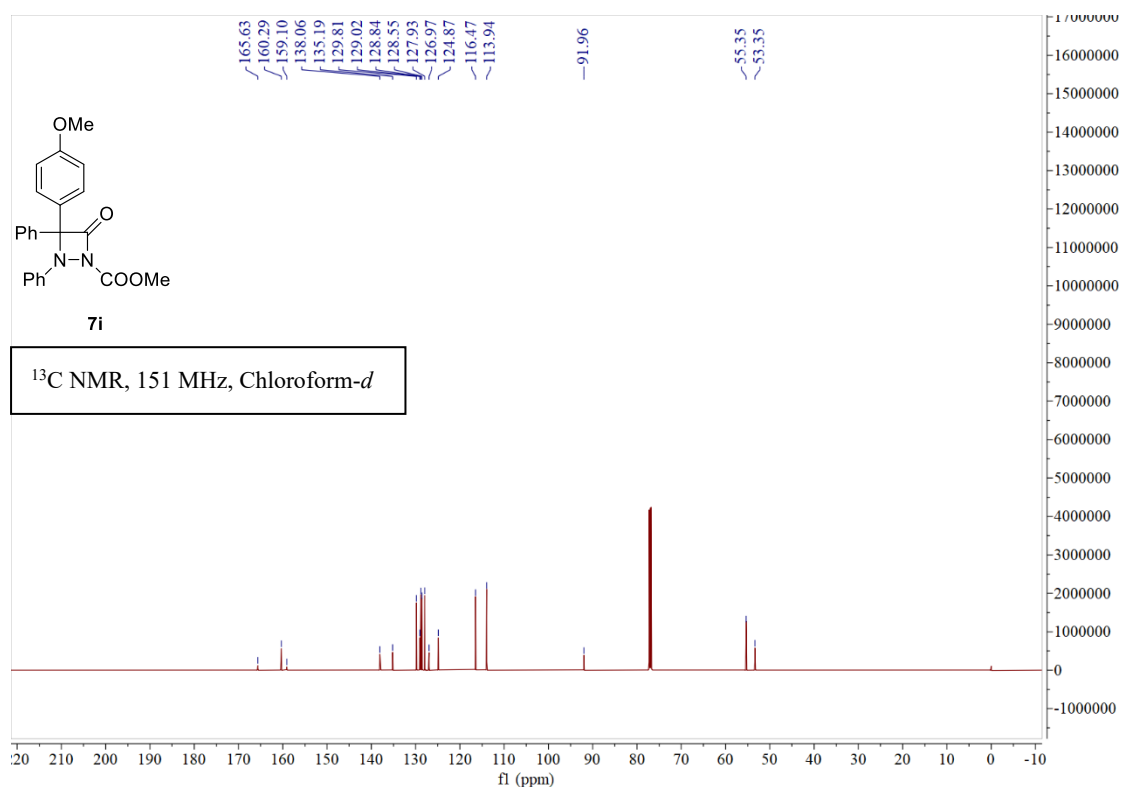

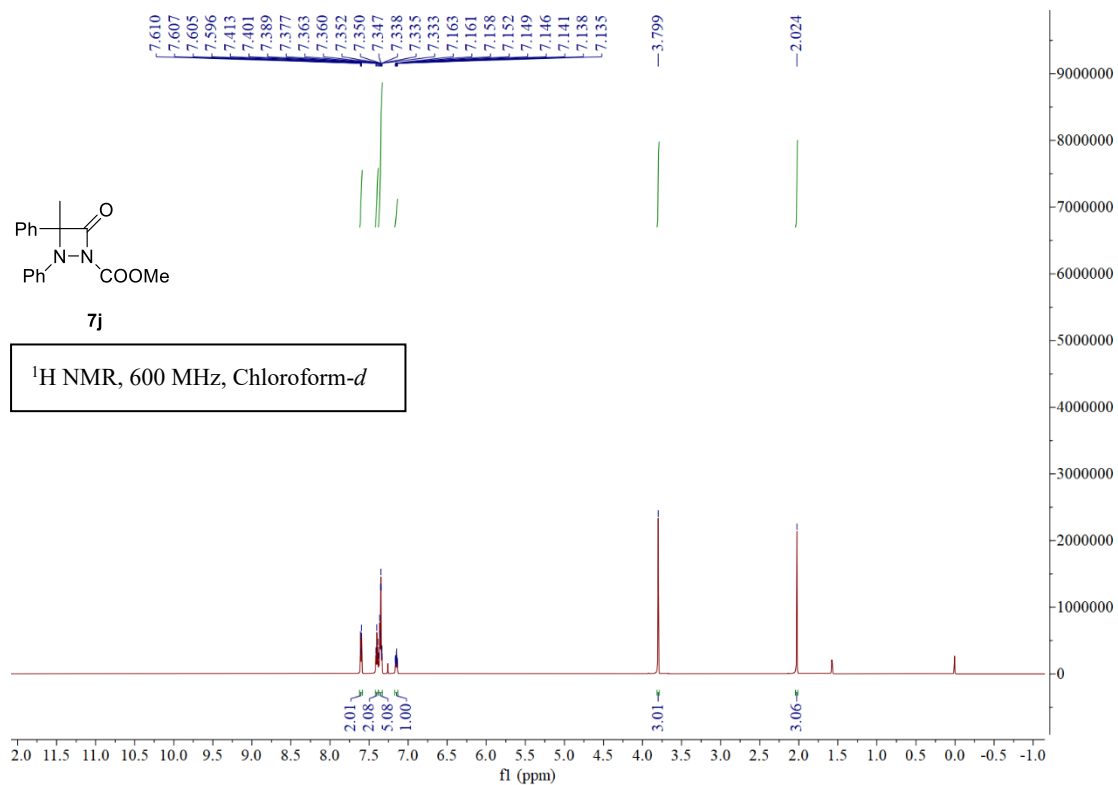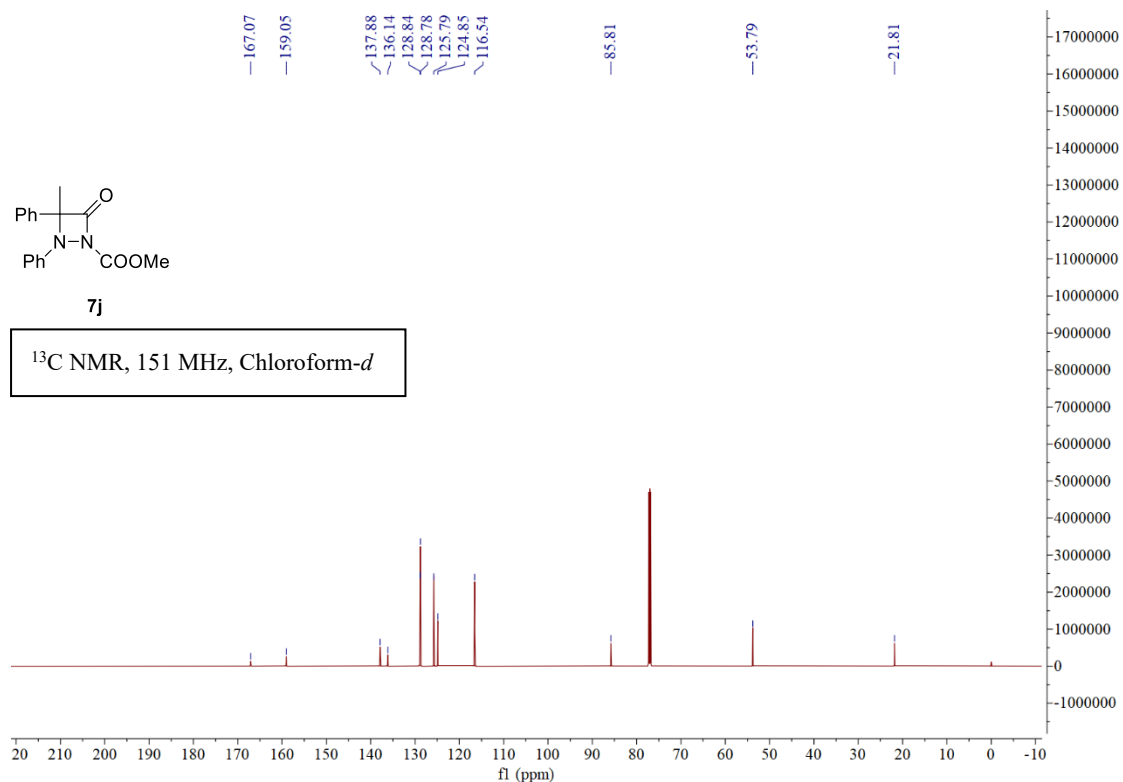

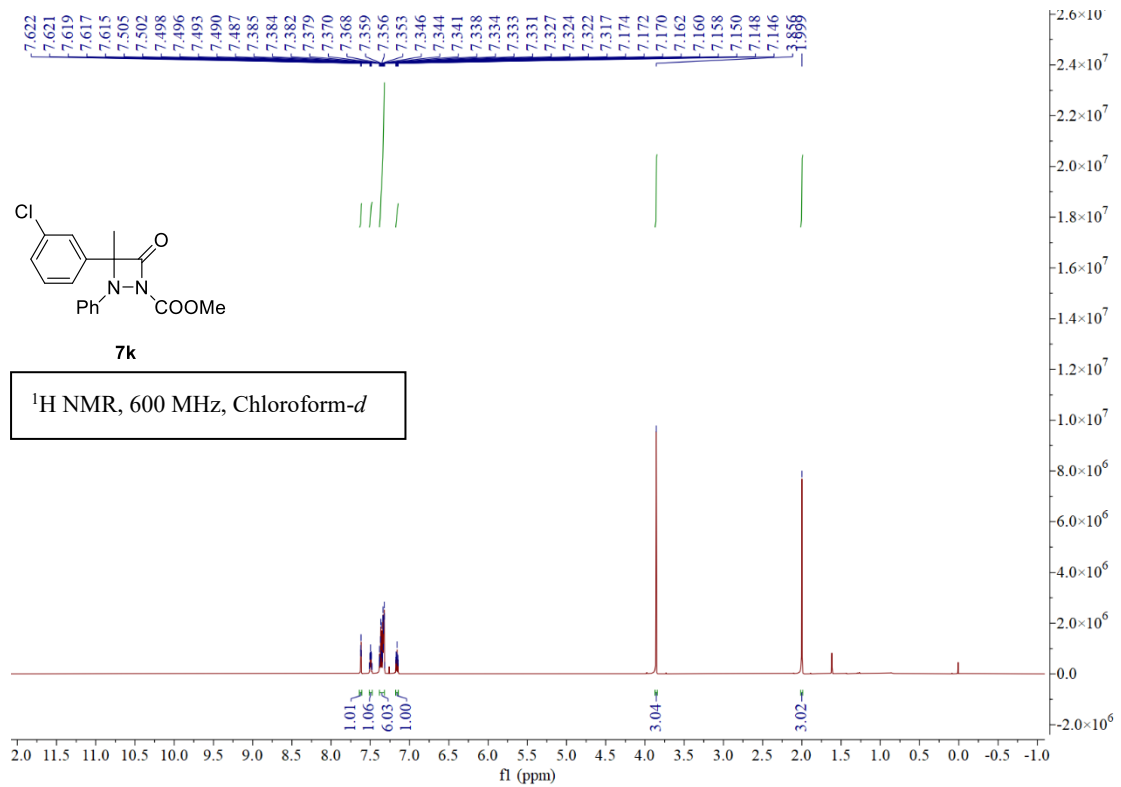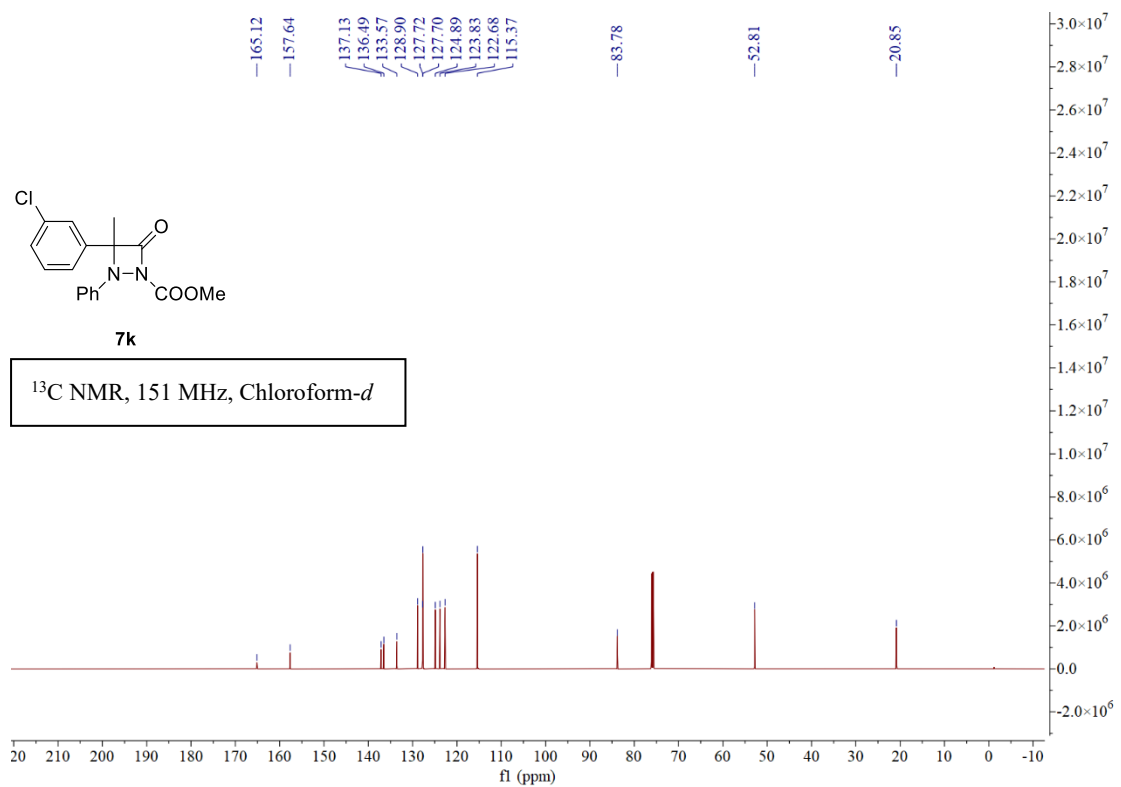

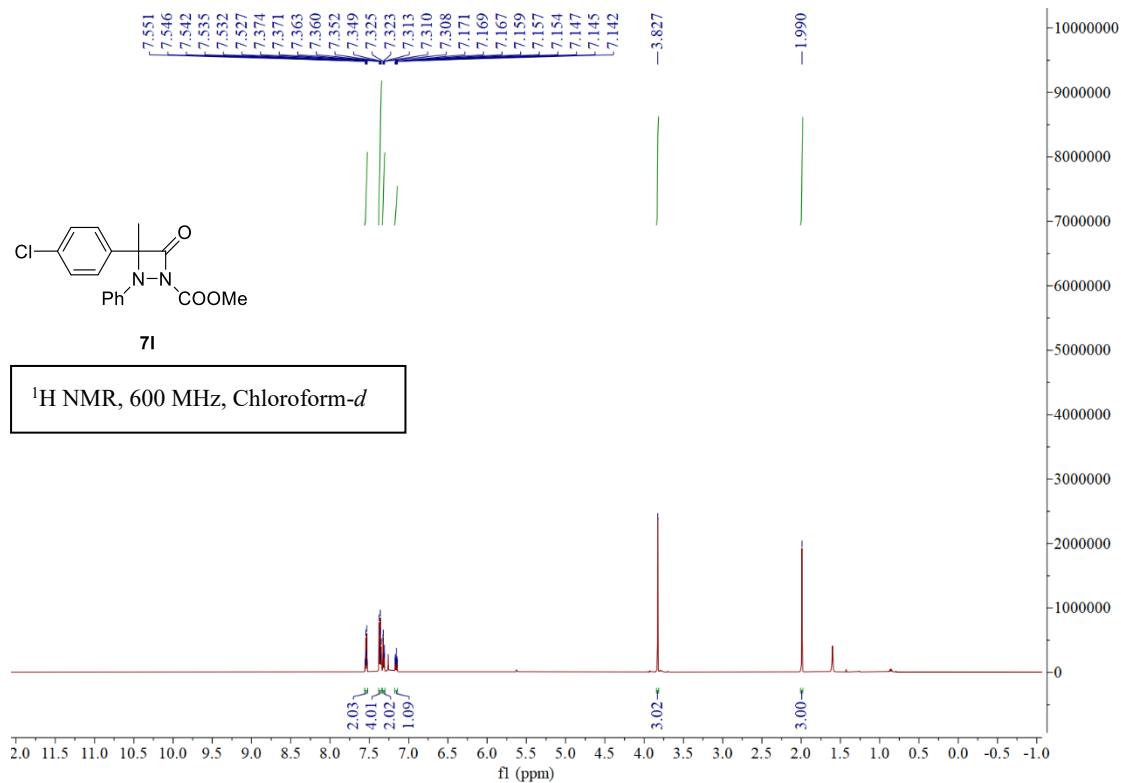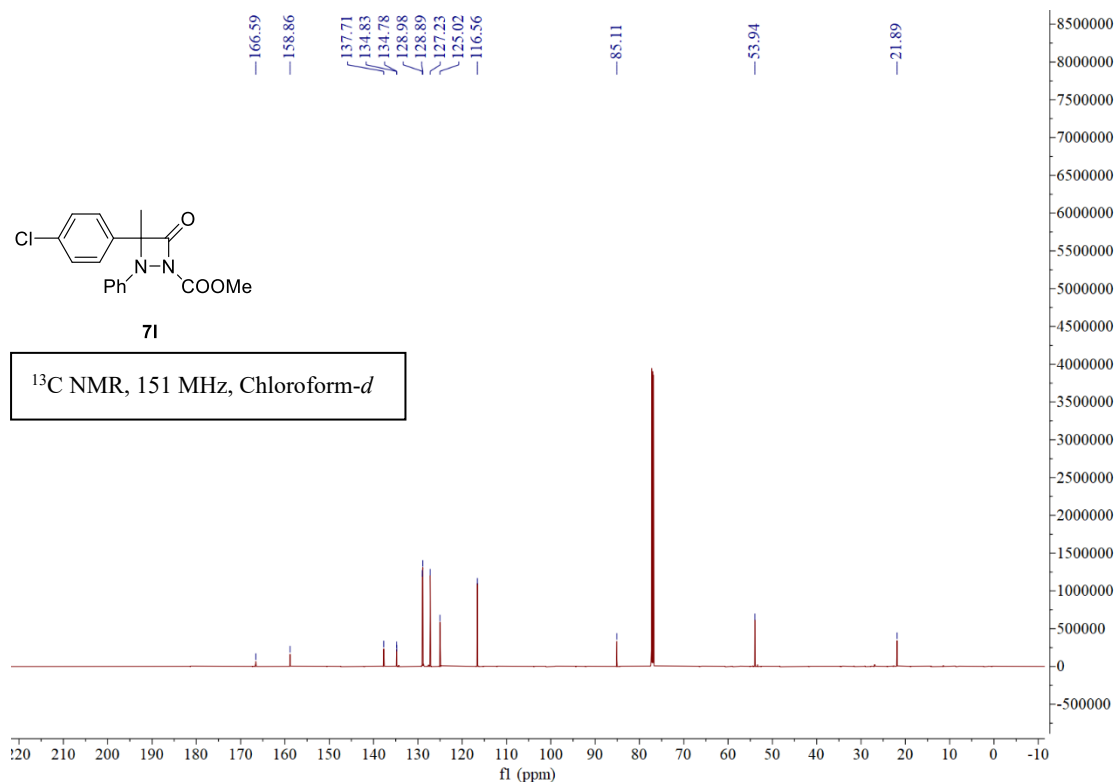



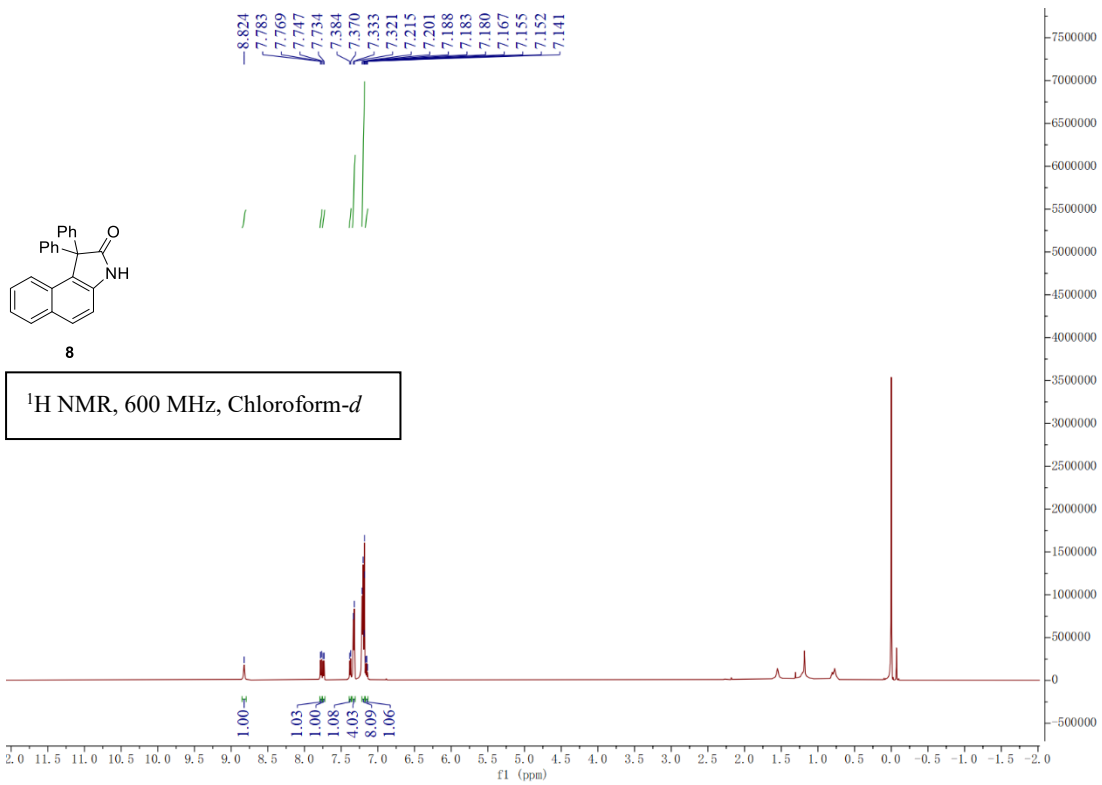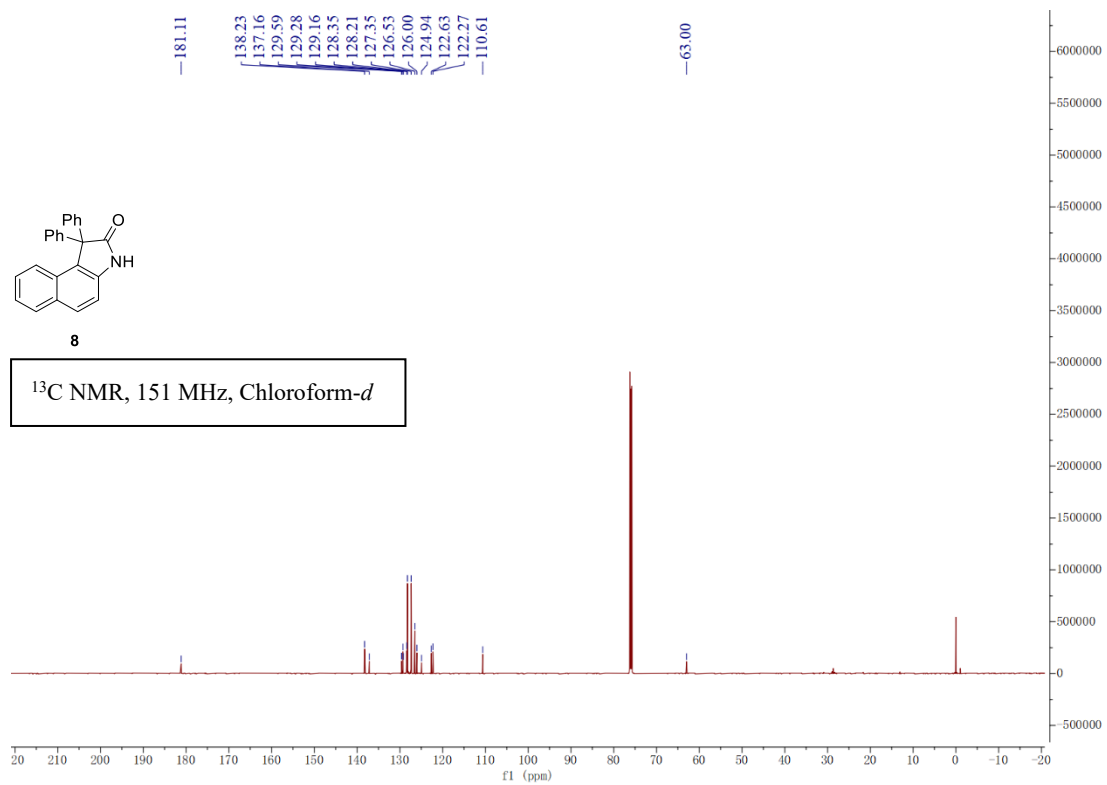

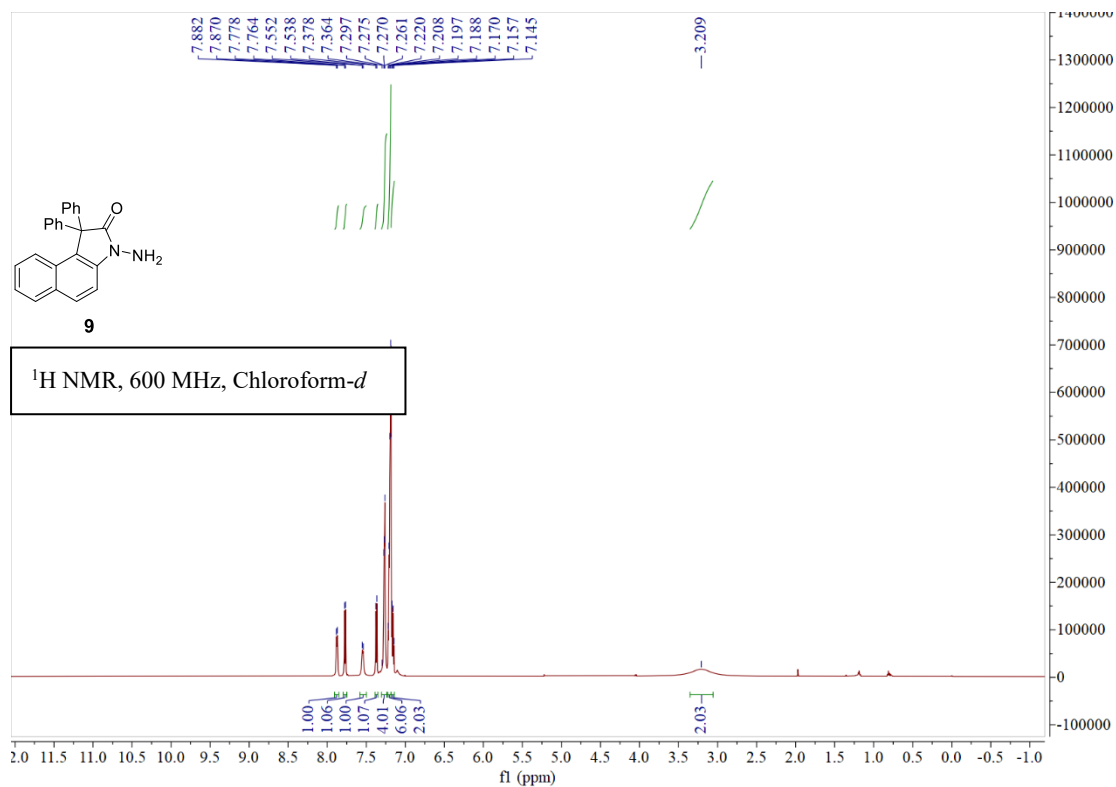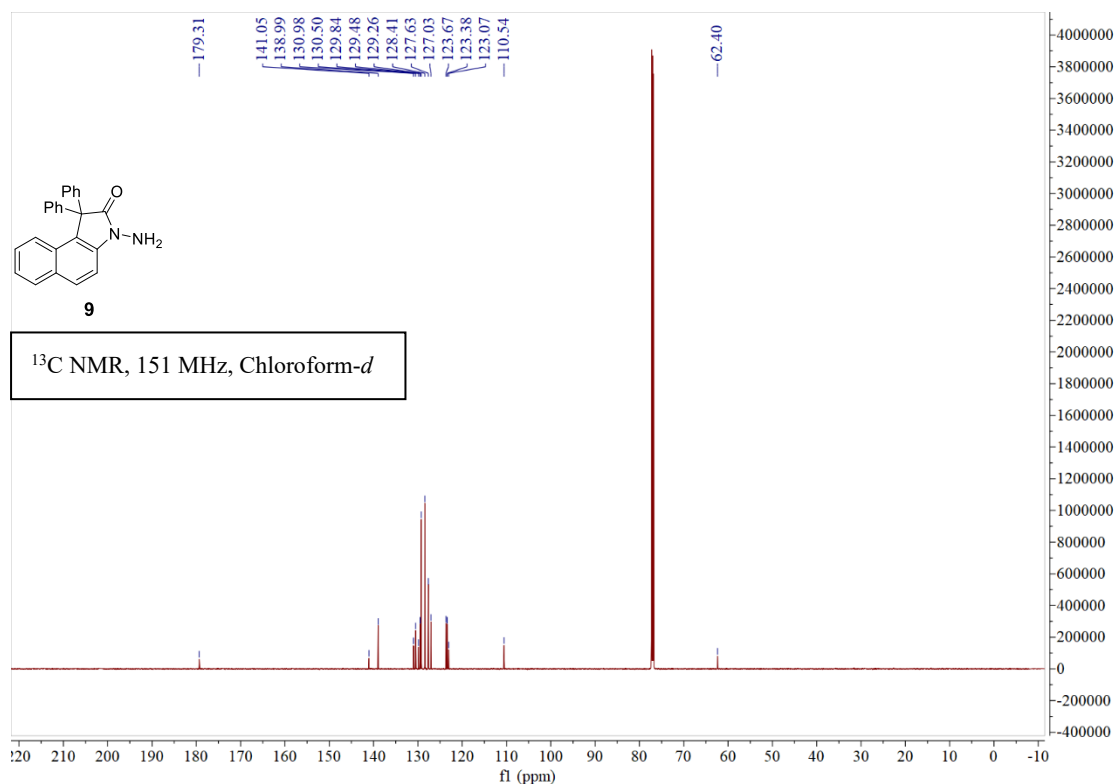

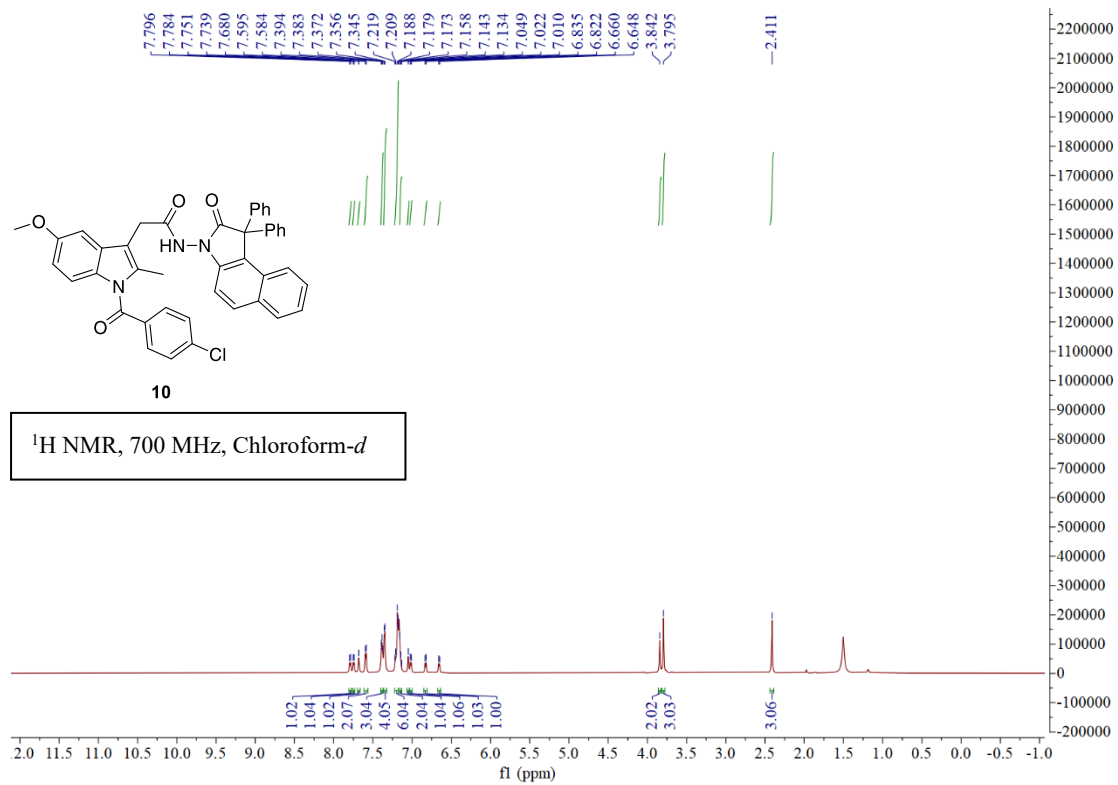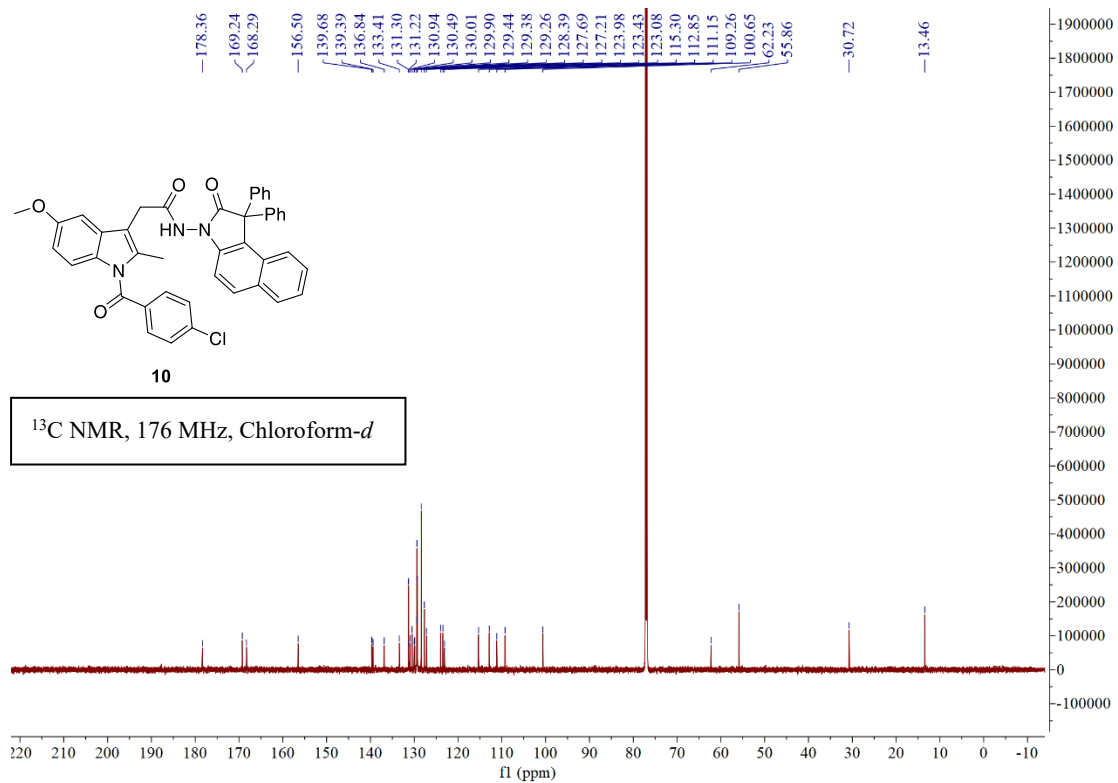

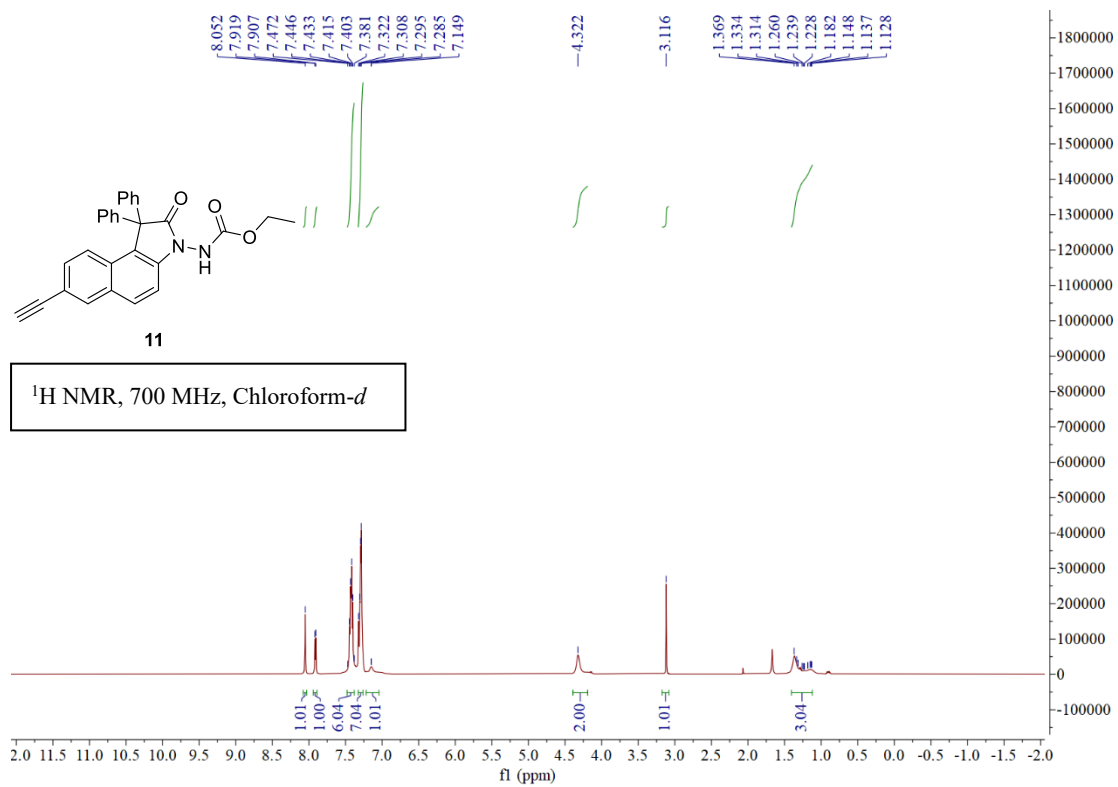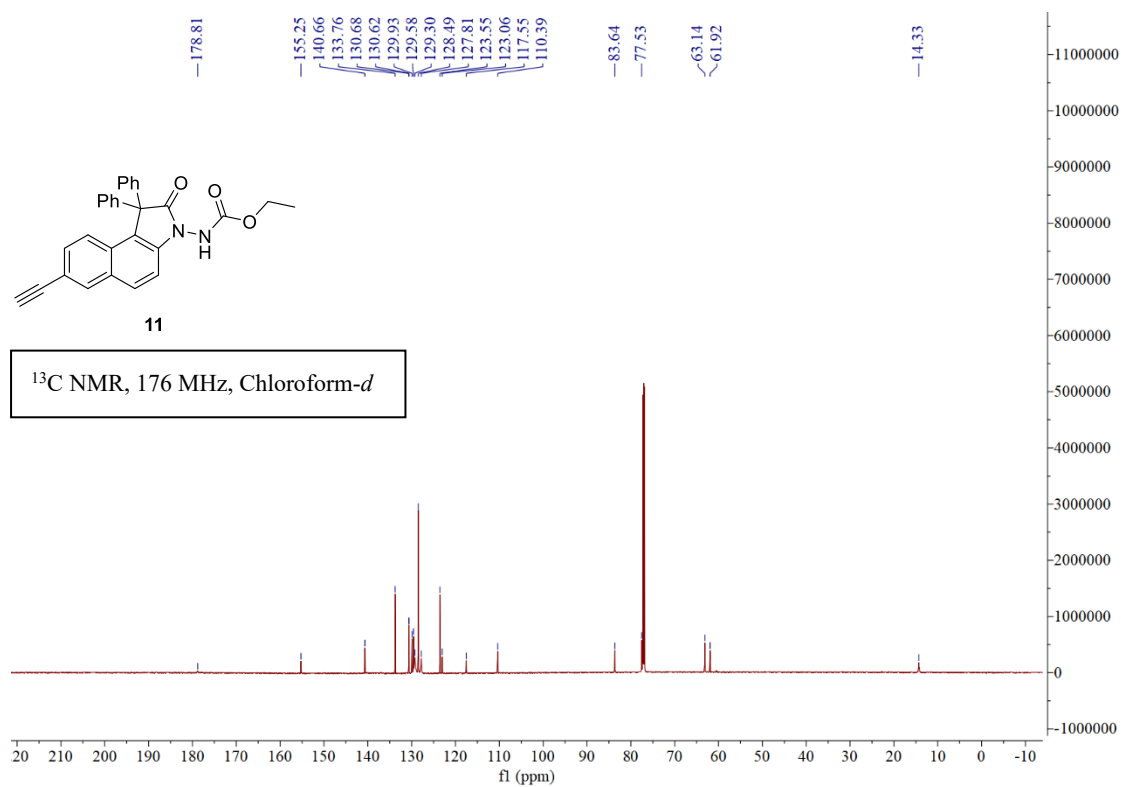

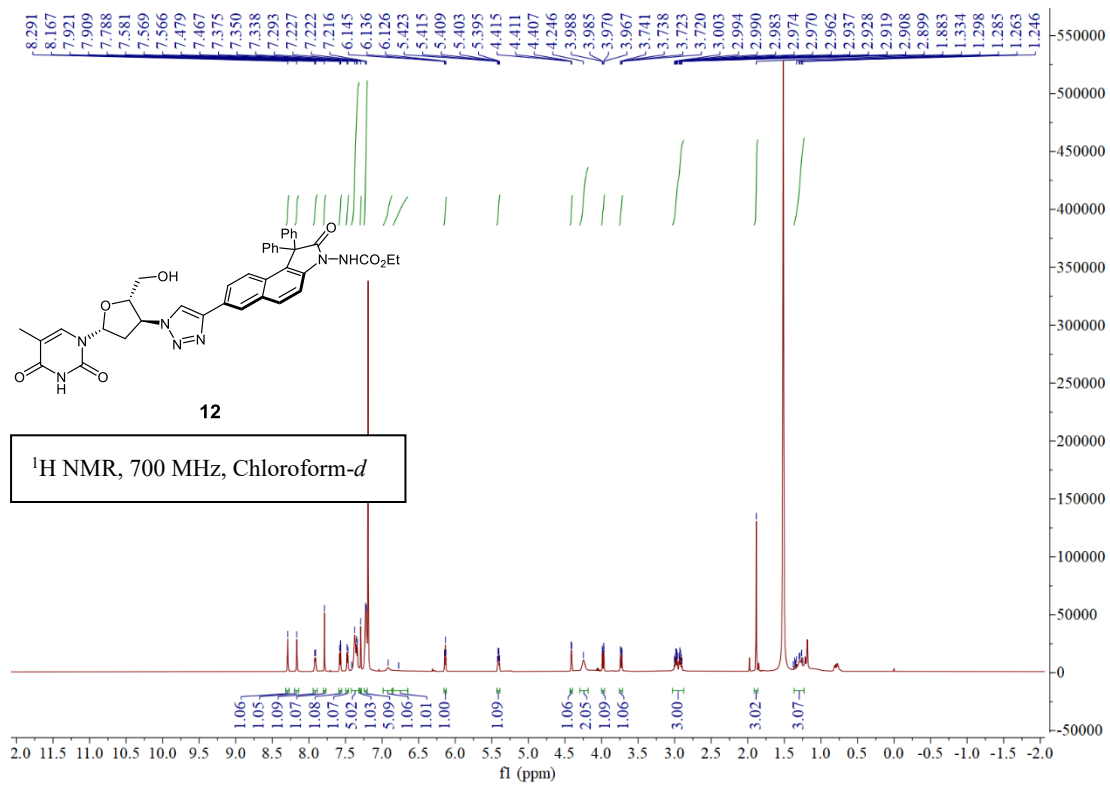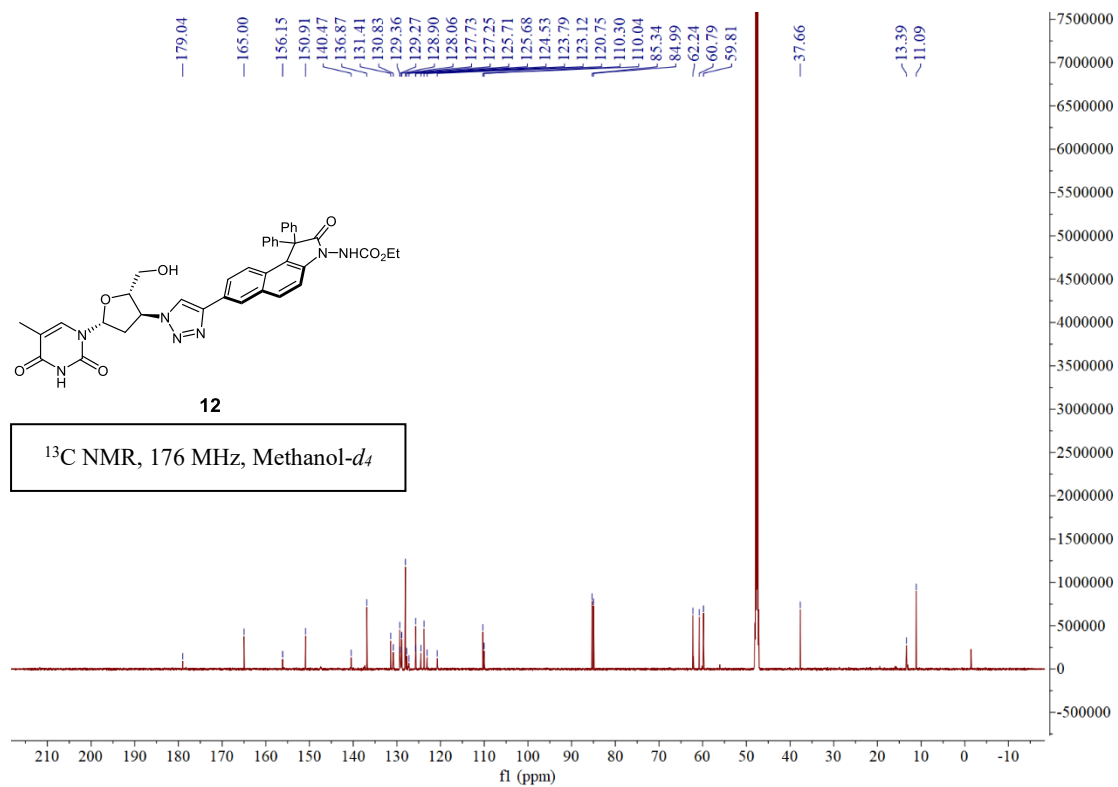

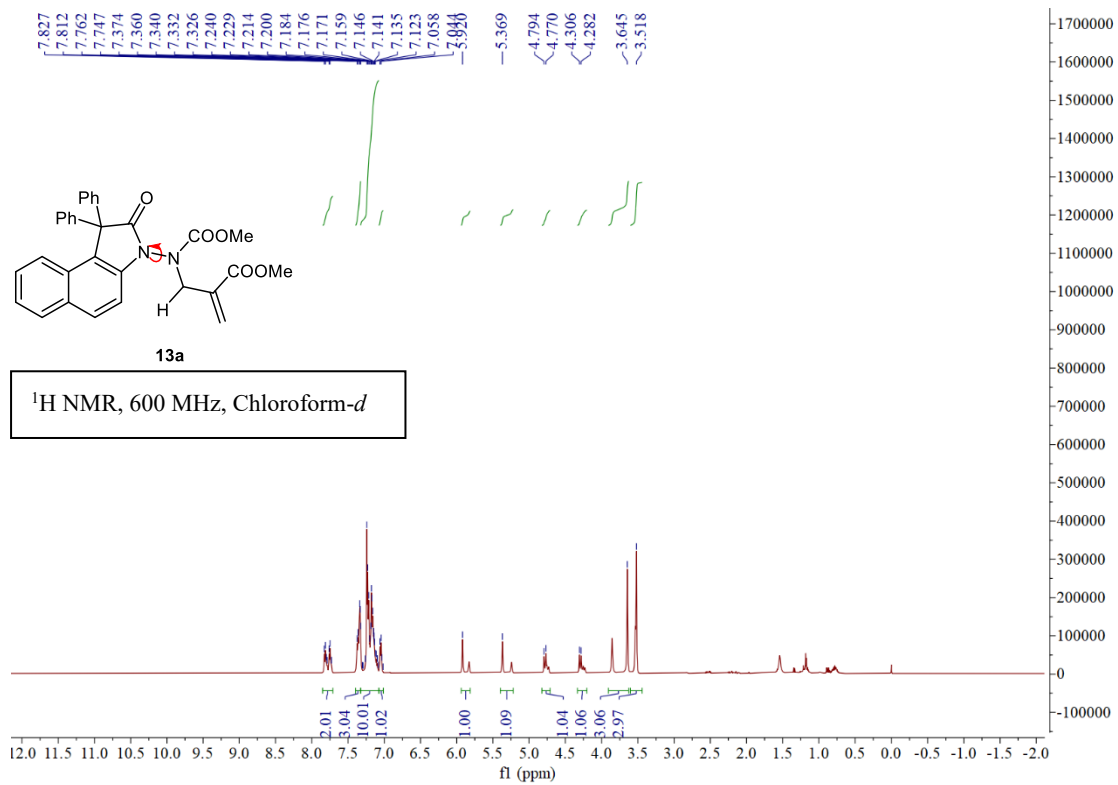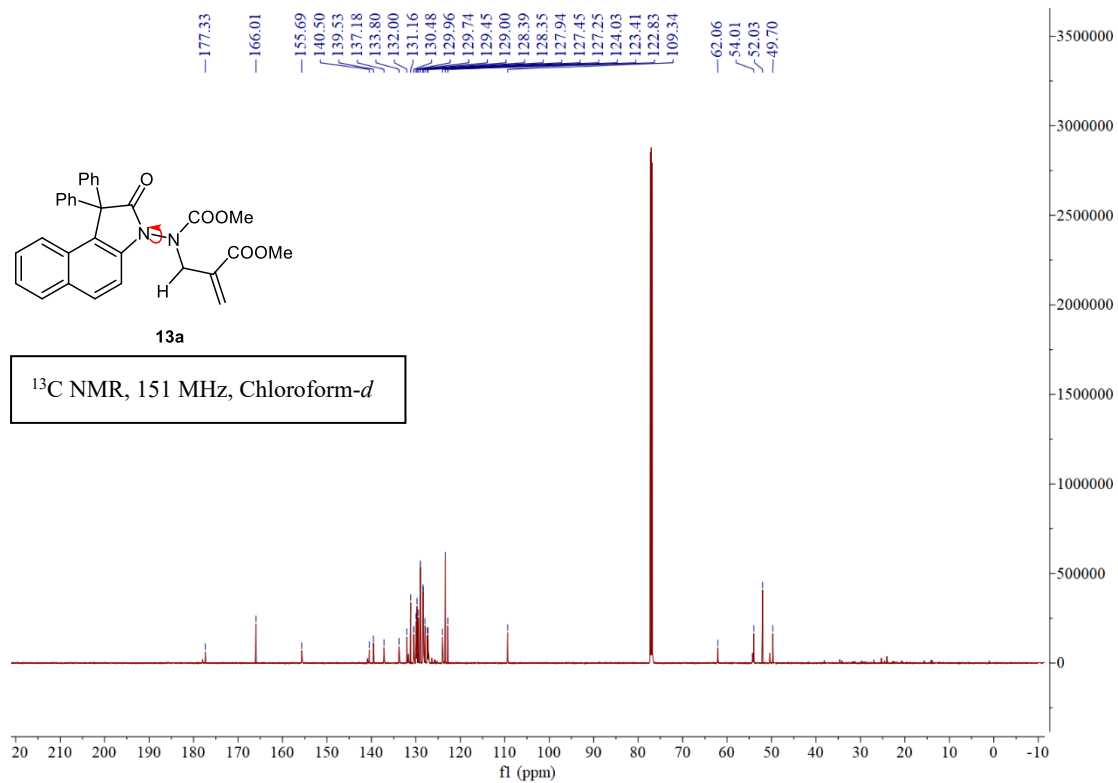

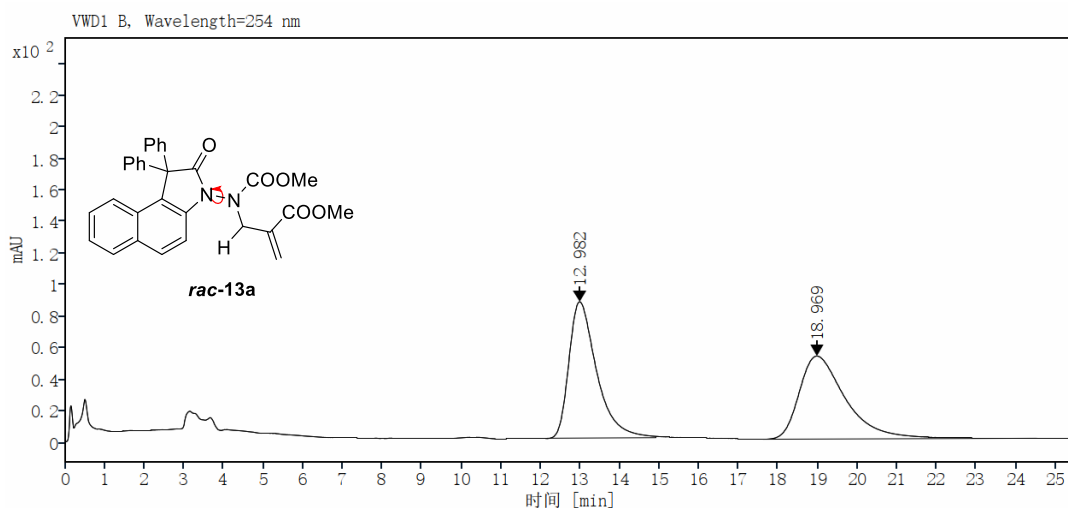

VWD1 B, Wavelength=254 nm

| No.   | RT [min] | Area      | Width [min] | Area %  |
|-------|----------|-----------|-------------|---------|
| 1     | 12.982   | 4197.8672 | 0.720       | 49.4699 |
| 2     | 18.969   | 4287.8369 | 1.193       | 50.5301 |
| Total |          | 8485.7041 |             |         |

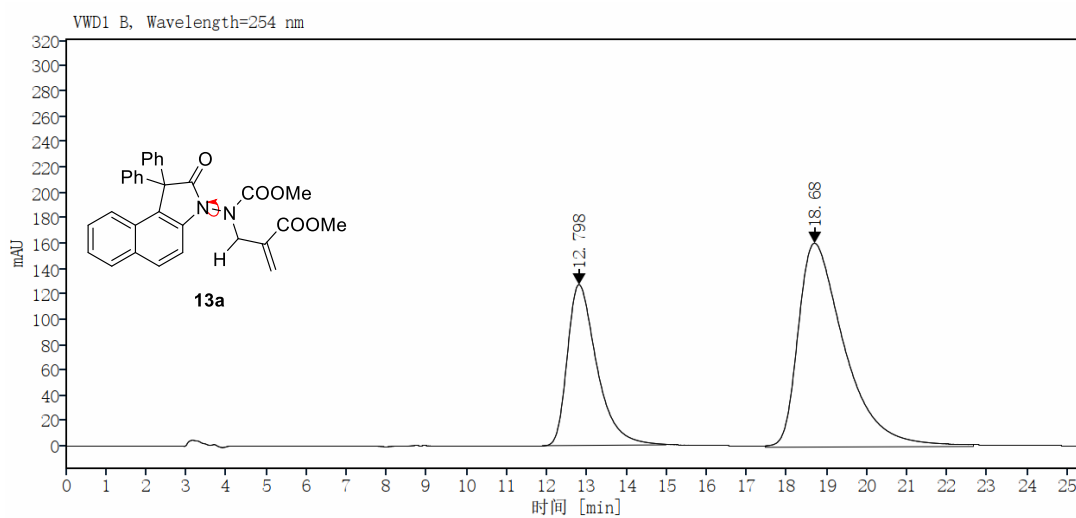

VWD1 B, Wavelength=254 nm

| No.   | RT [min] | Area       | Width [min] | Area %  |
|-------|----------|------------|-------------|---------|
| 1     | 12.798   | 6492.1860  | 0.766       | 33.2986 |
| 2     | 18.680   | 13004.6670 | 1.177       | 66.7014 |
| Total |          | 19496.8530 |             |         |

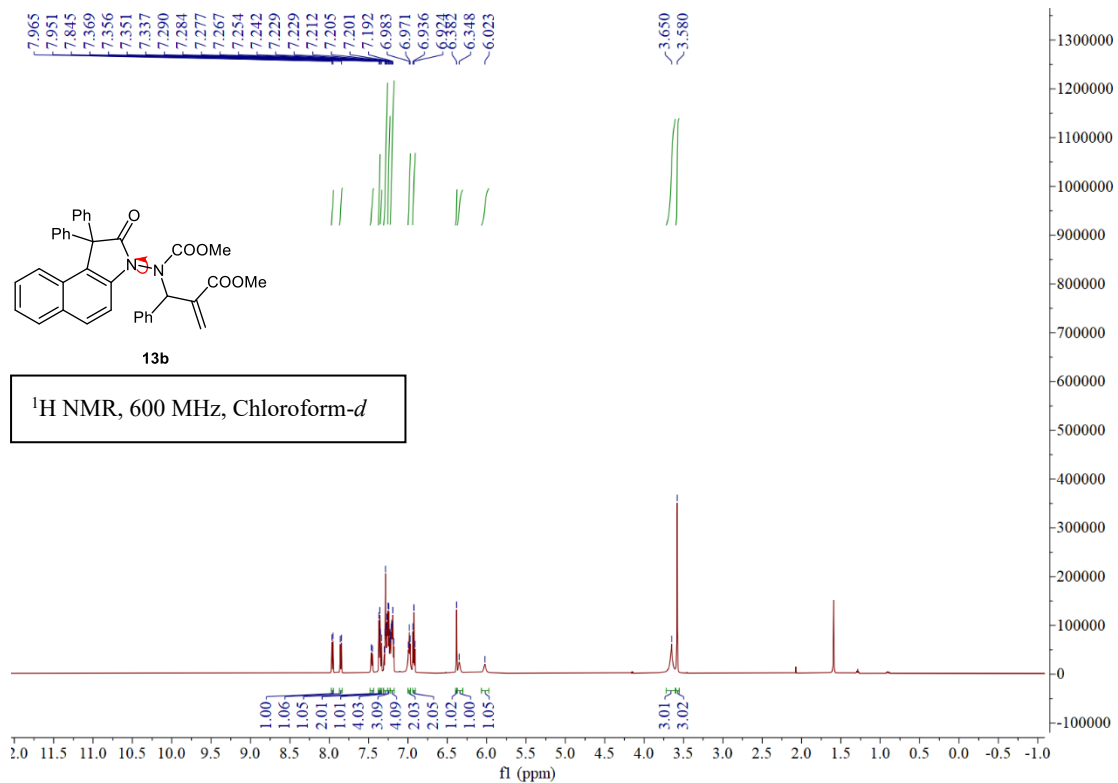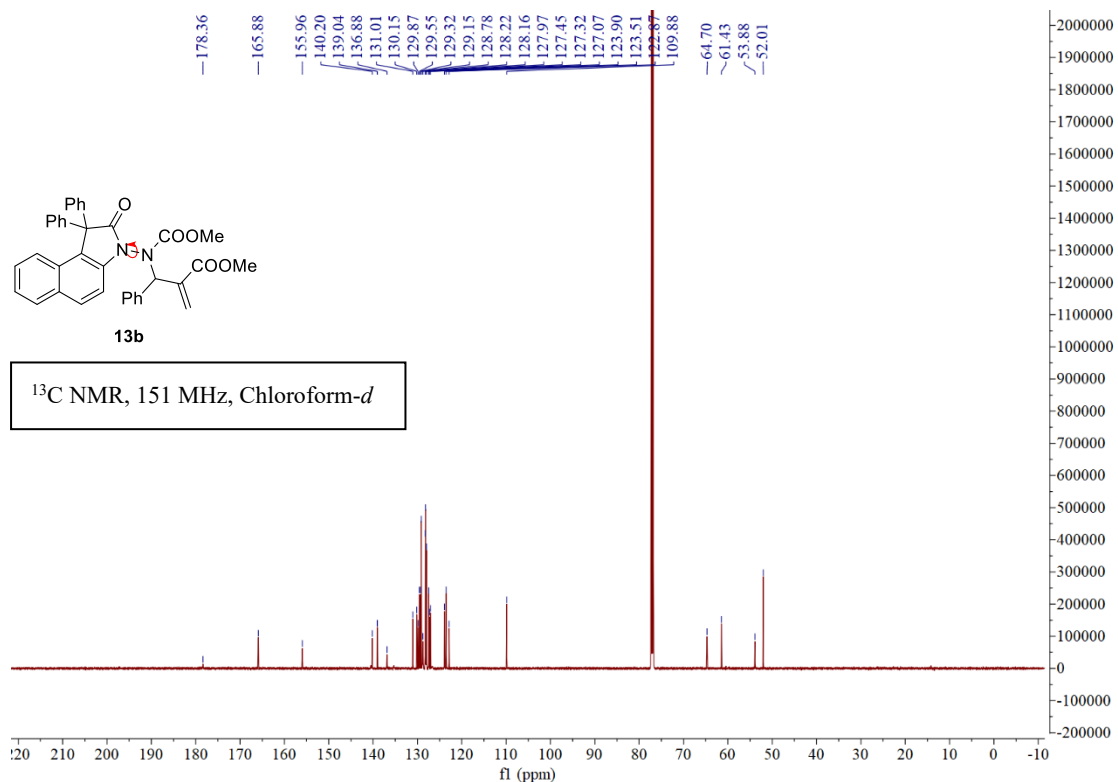



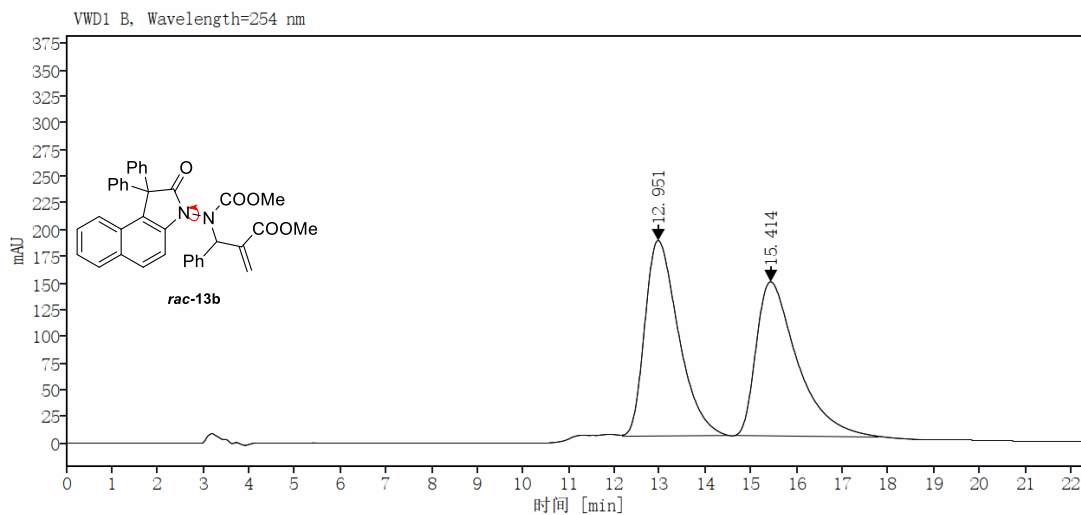

VWD1 B, Wavelength=254 nm

| No.   | RT [min] | Area       | Width [min] | Area %  |
|-------|----------|------------|-------------|---------|
| 1     | 12.951   | 9412.3945  | 0.793       | 50.8764 |
| 2     | 15.414   | 9088.0996  | 0.933       | 49.1236 |
| Total |          | 18500.4941 |             |         |

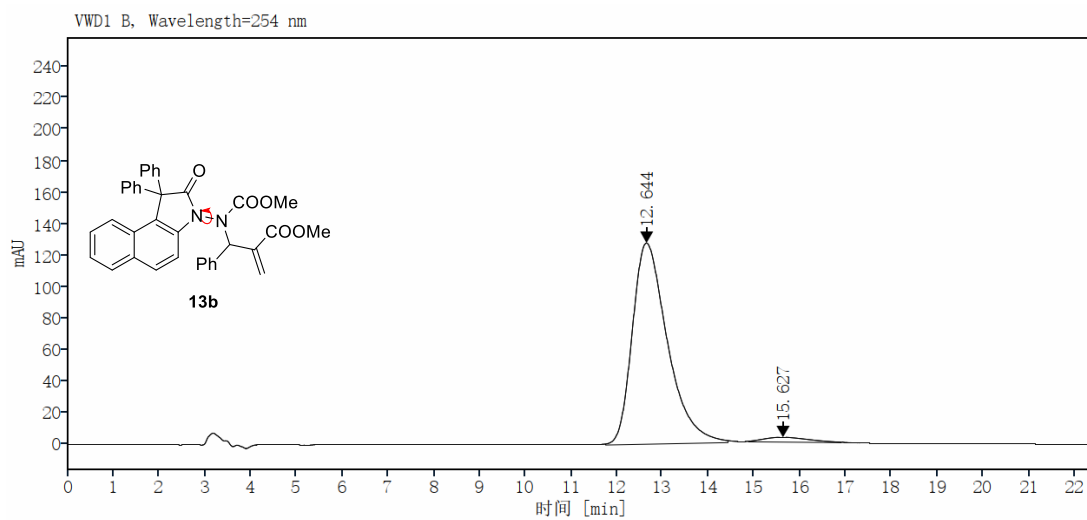

VWD1 B, Wavelength=254 nm

| No.   | RT [min] | Area      | Width [min] | Area %  |
|-------|----------|-----------|-------------|---------|
| 1     | 12.644   | 6829.2905 | 0.802       | 97.0019 |
| 2     | 15.627   | 211.0752  | 1.087       | 2.9981  |
| Total |          | 7040.3658 |             |         |
